# Supplementary material
Source: PubMed Central journal article supplement (PMC6737842)
Supplement: jo9b01428_si_001.pdf [file jo9b01428_si_001.pdf]

## SUPPORTING INFORMATION

### Sodium Diisopropylamide-Mediated Dehydrohalogenations: Influence of Primary- and Secondary-Shell Solvation

Yun Ma, Russell F. Algera, Ryan A. Woltornist, and David B. Collum\*

Department of Chemistry and Chemical Biology

Baker Laboratory, Cornell University

Ithaca, New York 14853–1301

E-mail: [dbc6@cornell.edu](mailto:dbc6@cornell.edu)

#### I. NMR Spectroscopic studies

|                    |                                                                                                                                                                                               |      |
|--------------------|-----------------------------------------------------------------------------------------------------------------------------------------------------------------------------------------------|------|
| <b>Figure S-1</b>  | $^1\text{H}$ NMR spectrum of 1-bromooctane-1,1- $d_2$ (1,1- <b>1-<math>d_2</math></b> ) in $\text{CDCl}_3$ .                                                                                  | S-9  |
| <b>Figure S-2</b>  | $^{13}\text{C}$ NMR spectrum of 1-bromooctane-1,1- $d_2$ (1,1- <b>1-<math>d_2</math></b> ) in $\text{CDCl}_3$ .                                                                               | S-9  |
| <b>Figure S-3</b>  | $^1\text{H}$ NMR spectra of NaDA with 1-bromooctane ( <b>1</b> ) and 1-bromooctane-1,1- $d_2$ (1,1- <b>1-<math>d_2</math></b> ).                                                              | S-10 |
| <b>Figure S-4</b>  | $^1\text{H}$ NMR spectrum of 1-bromooctane-2,2- $d_2$ (2,2- <b>1-<math>d_2</math></b> ) in $\text{CDCl}_3$ .                                                                                  | S-11 |
| <b>Figure S-5</b>  | $^1\text{H}$ NMR spectrum of 1-bromooctane-2,2- $d_2$ (2,2- <b>1-<math>d_2</math></b> ) in $\text{CDCl}_3$ .                                                                                  | S-11 |
| <b>Figure S-6</b>  | $^1\text{H}$ NMR spectra of NaDA with 1-bromooctane ( <b>1</b> ), 1-bromooctane-1,1- $d_2$ (1,1- <b>1-<math>d_2</math></b> ), and 1-bromooctane-2,2- $d_2$ (2,2- <b>1-<math>d_2</math></b> ). | S-12 |
| <b>Figure S-7</b>  | $^1\text{H}$ NMR spectrum of 2-bromooctane ( <b>A</b> ) in $\text{CDCl}_3$ .                                                                                                                  | S-13 |
| <b>Figure S-8</b>  | $^1\text{H}$ NMR spectrum of 1-octene ( <b>2</b> ) in $\text{THF-}d_8$ .                                                                                                                      | S-14 |
| <b>Figure S-9</b>  | Partial $^1\text{H}$ NMR spectrum of 1-octene ( <b>2</b> ) in $\text{THF-}d_8$ .                                                                                                              | S-14 |
| <b>Figure S-10</b> | $^1\text{H}$ NMR spectrum of 1-chlorooctane ( <b>5</b> ) in $\text{CDCl}_3$ .                                                                                                                 | S-15 |
| <b>Figure S-11</b> | $^{13}\text{C}$ NMR spectrum of 1-chlorooctane ( <b>5</b> ) in $\text{CDCl}_3$ .                                                                                                              | S-15 |
| <b>Figure S-12</b> | $^1\text{H}$ NMR spectrum of 1-chlorooctane-1,1- $d_2$ (1,1- <b>5-<math>d_2</math></b> ) in $\text{CDCl}_3$ .                                                                                 | S-16 |
| <b>Figure S-13</b> | $^{13}\text{C}$ NMR spectrum of 1-chlorooctane-1,1- $d_2$ (1,1- <b>5-<math>d_2</math></b> ) in $\text{CDCl}_3$ .                                                                              | S-16 |
| <b>Figure S-14</b> | $^1\text{H}$ NMR spectra of NaDA in $\text{THF/hexane}$ with 1-chlorooctane ( <b>5</b> ) and 1-                                                                                               | S-17 |

|                    |                                                                                                                                                                                                                                                                                                                                                                                                                                                                        |      |
|--------------------|------------------------------------------------------------------------------------------------------------------------------------------------------------------------------------------------------------------------------------------------------------------------------------------------------------------------------------------------------------------------------------------------------------------------------------------------------------------------|------|
|                    | chlorooctane-1,1- $d_2$ (1,1- <b>5-<math>d_2</math></b> ).                                                                                                                                                                                                                                                                                                                                                                                                             |      |
| <b>Figure S-15</b> | $^{13}\text{C}$ NMR spectra of NaDA with 1-chlorooctane ( <b>5</b> ) and 1-chlorooctane-1,1- $d_2$ (1,1- <b>5-<math>d_2</math></b> ) in THF/hexane.                                                                                                                                                                                                                                                                                                                    | S-18 |
| <b>Figure S-16</b> | $^1\text{H}$ NMR spectrum of <i>n</i> -octyl benzenesulfonate ( <b>12</b> ) in $\text{CDCl}_3$ .                                                                                                                                                                                                                                                                                                                                                                       | S-19 |
| <b>Figure S-17</b> | $^{13}\text{C}$ NMR spectrum of <i>n</i> -octyl benzenesulfonate ( <b>12</b> ) in $\text{CDCl}_3$ .                                                                                                                                                                                                                                                                                                                                                                    | S-19 |
| <b>Figure S-18</b> | $^1\text{H}$ NMR spectrum of deuterated <i>n</i> -octyl benzenesulfonate ( <b>D</b> ) in $\text{CDCl}_3$ .                                                                                                                                                                                                                                                                                                                                                             | S-20 |
| <b>Figure S-19</b> | $^{13}\text{C}$ NMR spectrum of deuterated <i>n</i> -octylbenzenesulfonate ( <b>D</b> ) in $\text{CDCl}_3$ .                                                                                                                                                                                                                                                                                                                                                           | S-20 |
| <b>Figure S-20</b> | $^1\text{H}$ NMR spectrum of <i>n</i> -octyl trifluoromethanesulfonate ( <b>13</b> ) in $\text{CDCl}_3$ .                                                                                                                                                                                                                                                                                                                                                              | S-21 |
| <b>Figure S-21</b> | $^{13}\text{C}$ NMR spectrum of <i>n</i> -octyl trifluoromethanesulfonate ( <b>13</b> ) in $\text{CDCl}_3$ .                                                                                                                                                                                                                                                                                                                                                           | S-21 |
| <b>Figure S-22</b> | $^{19}\text{F}$ NMR spectrum of <i>n</i> -octyl trifluoromethanesulfonate ( <b>13</b> ) in $\text{CDCl}_3$ .                                                                                                                                                                                                                                                                                                                                                           | S-21 |
| <b>Figure S-23</b> | $^1\text{H}$ NMR spectrum of <i>cis</i> -1-bromo-1-deuterio-4- <i>tert</i> -butylcyclohexane ( <i>cis</i> - <b>17-<math>d_1</math></b> ) in $\text{CDCl}_3$ .                                                                                                                                                                                                                                                                                                          | S-22 |
| <b>Figure S-24</b> | $^1\text{H}$ NMR spectra of NaDA with <i>cis</i> -1-bromo-4-( <i>tert</i> -butyl)cyclohexane-1- $d_1$ ( <i>cis</i> - <b>17-<math>d_1</math></b> ) and <i>trans</i> -1-bromo-4-( <i>tert</i> -butyl)cyclohexane-1- $d_1$ ( <i>trans</i> - <b>17-<math>d_1</math></b> ) at $-50\text{ }^\circ\text{C}$ in THF/hexane: (A) 4-( <i>tert</i> -butyl)-1-deuterio-cyclohex-1-ene ( <b>18-<math>d_1</math></b> ), and (B) 4-( <i>tert</i> -butyl)cyclohex-1-ene ( <b>18</b> ). | S-23 |
| <b>Figure S-25</b> | $^{13}\text{C}$ NMR spectra of NaDA with <i>cis</i> -1-bromo-4-( <i>tert</i> -butyl)cyclohexane-1- $d_1$ ( <i>cis</i> - <b>17-<math>d_1</math></b> ) at $-50\text{ }^\circ\text{C}$ in THF/hexane: 4-( <i>tert</i> -butyl)-1-deuteriocyclohex-1-ene ( <b>18-<math>d_1</math></b> ).                                                                                                                                                                                    | S-24 |
| <b>Figure S-26</b> | $^1\text{H}$ NMR spectrum of <i>trans</i> -1-bromo-4- <i>tert</i> -butylcyclohexane ( <i>trans</i> - <b>17</b> ) in $\text{CDCl}_3$ .                                                                                                                                                                                                                                                                                                                                  | S-25 |
| <b>Figure S-27</b> | $^{13}\text{C}$ NMR spectrum of <i>trans</i> -1-bromo-4- <i>tert</i> -butylcyclohexane ( <i>trans</i> - <b>17</b> ) in $\text{CDCl}_3$ .                                                                                                                                                                                                                                                                                                                               | S-25 |
| <b>Figure S-28</b> | $^1\text{H}$ NMR spectrum of <i>trans</i> -1-bromo-4-( <i>tert</i> -butyl)cyclohexane-2,2,6,6- $d_4$ ( <i>trans</i> - <b>17-<math>d_4</math></b> ) in $\text{CDCl}_3$ .                                                                                                                                                                                                                                                                                                | S-26 |
| <b>Figure S-29</b> | $^{13}\text{C}$ NMR spectrum of <i>trans</i> -1-bromo-4-( <i>tert</i> -butyl)cyclohexane-2,2,6,6- $d_4$ ( <i>trans</i> - <b>17-<math>d_4</math></b> ) in $\text{CDCl}_3$ .                                                                                                                                                                                                                                                                                             | S-26 |
| <b>Figure S-30</b> | $^{13}\text{C}$ NMR spectrum of NaDA with <i>trans</i> -1-bromo-4- <i>tert</i> -butylcyclohexane ( <i>trans</i> - <b>17</b> ) at $-35\text{ }^\circ\text{C}$ in THF/hexane.                                                                                                                                                                                                                                                                                            | S-27 |
| <b>Figure S-31</b> | $^{13}\text{C}$ NMR spectrum of NaDA with 1-bromo-4- <i>tert</i> -butylcyclohexane ( <i>trans</i> - <b>17-<math>d_4</math></b> ) at $-35\text{ }^\circ\text{C}$ in THF/hexane.                                                                                                                                                                                                                                                                                         | S-27 |

|                    |                                                                                                                                                                                               |      |
|--------------------|-----------------------------------------------------------------------------------------------------------------------------------------------------------------------------------------------|------|
| <b>Figure S-32</b> | $^1\text{H}$ NMR spectrum at $-110\text{ }^\circ\text{C}$ in $\text{THF-}d_8$ of cycloocta-1,2-diene ( <b>28</b> ), cyclooctyne ( <b>27</b> ) and diisopropylamine.                           | S-28 |
| <b>Figure S-33</b> | $^{13}\text{C}$ NMR spectrum at $-110\text{ }^\circ\text{C}$ in $\text{THF-}d_8$ of cycloocta-1,2-diene ( <b>28</b> ), cyclooctyne ( <b>27</b> ) and diisopropylamine.                        | S-29 |
| <b>Figure S-34</b> | 2D $^1\text{H}/^{13}\text{C}$ HSQC spectrum at $-110\text{ }^\circ\text{C}$ in $\text{THF-}d_8$ of cycloocta-1,2-diene ( <b>28</b> ), cyclooctyne ( <b>27</b> ) and diisopropylamine.         | S-30 |
| <b>Figure S-35</b> | 2D $^1\text{H}/^{13}\text{C}$ HSQC spectrum at $-110\text{ }^\circ\text{C}$ in $\text{THF-}d_8$ of cycloocta-1,2-diene ( <b>28</b> ), cyclooctyne ( <b>27</b> ) and diisopropylamine.         | S-31 |
| <b>Figure S-36</b> | Partial 2D $^1\text{H}/^{13}\text{C}$ HMBC spectrum at $-110\text{ }^\circ\text{C}$ in $\text{THF-}d_8$ of cycloocta-1,2-diene ( <b>28</b> ), cyclooctyne ( <b>27</b> ) and diisopropylamine. | S-32 |
| <b>Figure S-37</b> | Partial 2D $^1\text{H}/^{13}\text{C}$ HMBC spectrum at $-110\text{ }^\circ\text{C}$ in $\text{THF-}d_8$ of cycloocta-1,2-diene ( <b>28</b> ), cyclooctyne ( <b>27</b> ) and diisopropylamine. | S-33 |
| <b>Figure S-38</b> | 2D $^1\text{H}$ ROESY spectrum at $-100\text{ }^\circ\text{C}$ in $\text{THF-}d_8$ of cycloocta-1,2-diene ( <b>28</b> ), cyclooctyne ( <b>27</b> ) and diisopropylamine.                      | S-34 |
| <b>Figure S-39</b> | $^1\text{H}$ NMR spectrum of <i>trans</i> -1-bromo-2-methoxycyclohexane ( <b>31</b> ) in $\text{CDCl}_3$ .                                                                                    | S-35 |
| <b>Figure S-40</b> | $^{13}\text{C}$ NMR spectrum of <i>trans</i> -1-bromo-2-methoxycyclohexane ( <b>31</b> ) in $\text{CDCl}_3$ .                                                                                 | S-35 |
| <b>Figure S-41</b> | $^1\text{H}$ NMR spectra of 1-bromo-2-methoxycyclohexane ( <b>31</b> ) in $\text{THF/hexane}$ , recorded at different temperatures.                                                           | S-36 |
| <b>Figure S-42</b> | $^1\text{H}$ NMR spectrum of 3-methoxycyclohex-1-ene ( <b>33</b> ) in $\text{THF-}d_8$ .                                                                                                      | S-37 |
| <b>Figure S-43</b> | $^{13}\text{C}$ NMR spectrum of 3-methoxycyclohex-1-ene ( <b>33</b> ) in $\text{THF-}d_8$ .                                                                                                   | S-37 |
| <b>Figure S-44</b> | $^1\text{H}$ NMR spectrum of 1-methoxycyclohex-1-ene ( <b>32</b> ) in $\text{THF-}d_8$ .                                                                                                      | S-38 |
| <b>Figure S-45</b> | $^{13}\text{C}$ NMR spectrum of 1-methoxycyclohex-1-ene ( <b>32</b> ) in $\text{THF-}d_8$ .                                                                                                   | S-38 |
| <b>Figure S-46</b> | $^1\text{H}$ NMR spectrum of 1-methoxycyclohex-1-ene ( <b>32</b> ) and 3-methoxycyclohex-1-ene ( <b>33</b> ) in $\text{THF-}d_8$ .                                                            | S-39 |
| <b>Figure S-47</b> | $^{13}\text{C}$ NMR spectrum of 1-methoxycyclohex-1-ene ( <b>32</b> ) and 3-methoxycyclohex-1-ene ( <b>33</b> ) in $\text{THF-}d_8$ .                                                         | S-39 |
| <b>Figure S-48</b> | $^1\text{H}$ NMR spectrum of 1-bromo-4-methoxycyclooctane ( <b>E</b> ) in $\text{THF-}d_8$ .                                                                                                  | S-40 |
| <b>Figure S-49</b> | $^{13}\text{C}$ NMR spectrum of 1-bromo-4-methoxycyclooctane ( <b>E</b> ) in $\text{THF-}d_8$ .                                                                                               | S-40 |

|                    |                                                                                                                    |      |
|--------------------|--------------------------------------------------------------------------------------------------------------------|------|
|                    | THF- <i>d</i> <sub>8</sub> .                                                                                       |      |
| <b>Figure S-50</b> | <sup>1</sup> H NMR spectrum of <i>trans</i> -1-bromo-2-methoxycyclooctane ( <b>35</b> ) in CDCl <sub>3</sub> .     | S-41 |
| <b>Figure S-51</b> | <sup>13</sup> C NMR spectrum of <i>trans</i> -1-bromo-2-methoxycyclooctane ( <b>35</b> ) in CDCl <sub>3</sub> .    | S-41 |
| <b>Figure S-52</b> | <sup>1</sup> H NMR spectrum of ( <i>Z</i> )-3-methoxycyclooct-1-ene ( <b>36</b> ) in THF- <i>d</i> <sub>8</sub> .  | S-42 |
| <b>Figure S-53</b> | <sup>13</sup> C NMR spectrum of ( <i>Z</i> )-3-methoxycyclooct-1-ene ( <b>36</b> ) in THF- <i>d</i> <sub>8</sub> . | S-42 |
| <b>Figure S-54</b> | <sup>1</sup> H NMR spectrum of (2-bromo-1-methoxyethyl)benzene ( <b>37</b> ) in CDCl <sub>3</sub> .                | S-43 |
| <b>Figure S-55</b> | <sup>13</sup> C NMR spectrum of (2-bromo-1-methoxyethyl)benzene ( <b>37</b> ) in CDCl <sub>3</sub> .               | S-43 |

---

## II. Rate studies

|                    |                                                                                                                                                                                                                 |      |
|--------------------|-----------------------------------------------------------------------------------------------------------------------------------------------------------------------------------------------------------------|------|
| <b>Figure S-56</b> | Plot of initial rate versus [THF] for the dehydrobromination of 1-bromooctane ( <b>1</b> ) with NaDA at –78 °C in hexane or 2,5-Me <sub>2</sub> THF.                                                            | S-44 |
| <b>Figure S-57</b> | Plot of initial rate versus [NaDA] in THF for the dehydrobromination of 1-bromooctane ( <b>1</b> ) at –78 °C.                                                                                                   | S-46 |
| <b>Figure S-58</b> | Plot of initial rate versus [THF] for the dehydrochlorination of 1-chlorooctane ( <b>5</b> ) with NaDA at –20 °C in hexane or 2,5-THF.                                                                          | S-47 |
| <b>Figure S-59</b> | Plot of initial rate versus [NaDA] in THF/hexane for the dehydrochlorination of 1-chlorooctane ( <b>5</b> ) at –20 °C.                                                                                          | S-49 |
| <b>Figure S-60</b> | Plot of [ <i>n</i> -C <sub>8</sub> H <sub>17</sub> N( <i>i</i> -Pr) <sub>2</sub> ]/[1-octene] versus THF concentration in hexane for the reaction of triflate ( <b>13</b> ) with NaDA at –78 °C.                | S-50 |
| <b>Figure S-61</b> | Plot of initial rate versus [THF] for the dehydrobromination of <i>cis</i> -1-bromo-4- <i>tert</i> -butylcyclohexane ( <i>cis</i> - <b>17</b> ) with NaDA at –50 °C in hexane or 2,5-Me <sub>2</sub> THF.       | S-51 |
| <b>Figure S-62</b> | Plot of initial rate versus [NaDA] in THF for the dehydrobromination of <i>cis</i> -1-bromo-4- <i>tert</i> -butylcyclohexane ( <i>cis</i> - <b>17</b> ) at –50 °C.                                              | S-53 |
| <b>Figure S-63</b> | Plot of initial rate versus [THF] for the dehydrobromination of <i>trans</i> -1-bromo-4-( <i>tert</i> -butyl)cyclohexane ( <i>trans</i> - <b>17</b> ) with NaDA at –25 °C in hexane or 2,5-Me <sub>2</sub> THF. | S-54 |
| <b>Figure S-64</b> | Plot of initial rate versus [NaDA] in THF for the dehydrobromination of                                                                                                                                         | S-56 |

|                     |                                                                                                                                                                                    |      |
|---------------------|------------------------------------------------------------------------------------------------------------------------------------------------------------------------------------|------|
|                     | <i>trans</i> -1-bromo-4- <i>tert</i> -butylcyclohexane ( <i>trans</i> - <b>17</b> ) at $-25\text{ }^{\circ}\text{C}$ .                                                             |      |
| <b>Figure S-65</b>  | Plot of initial rate versus [THF] in hexane for the dehydrobromination of <i>exo</i> -2-bromonorbornane ( <b>22</b> ) with NaDA at $-40\text{ }^{\circ}\text{C}$ .                 | S-57 |
| <b>Figure S-66</b>  | Plot of initial rate versus [NaDA] in THF THF for the dehydrobromination of <i>exo</i> -2-bromonorbornane ( <b>22</b> ) at $-40\text{ }^{\circ}\text{C}$ .                         | S-58 |
| <b>Figure S-67.</b> | Plot of initial rate versus [THF] in hexane for the dehydrochlorination of <i>exo</i> -2-chloronorbornane ( <b>23</b> ) with NaDA at $-20\text{ }^{\circ}\text{C}$ .               | S-59 |
| <b>Figure S-68</b>  | Plot of initial rate versus [NaDA] in THF for the dehydrochlorination of <i>exo</i> -2-chloronorbornane ( <b>23</b> ) at $-20\text{ }^{\circ}\text{C}$ .                           | S-60 |
| <b>Figure S-69</b>  | Plot of initial rate versus [THF] for the dehydrobromination of 1-bromocyclooctene ( <b>26</b> ) with NaDA at $-50\text{ }^{\circ}\text{C}$ in hexane and 2,5-Me <sub>2</sub> THF. | S-61 |
| <b>Figure S-70</b>  | Plot of initial rate versus [NaDA] in THF for the dehydrobromination of 1-bromocyclooctene ( <b>26</b> ) at $-55\text{ }^{\circ}\text{C}$ .                                        | S-63 |

---

### III. Calculations

|                  |                                                                                                                                         |      |
|------------------|-----------------------------------------------------------------------------------------------------------------------------------------|------|
| <b>Table S-1</b> | Geometric coordinates and thermally corrected MP2 energies for 1-bromooctane ( <b>1</b> ).                                              | S-64 |
| <b>Table S-2</b> | Geometric coordinates and thermally corrected MP2 energies for 1-chlorooctane ( <b>5</b> ).                                             | S-65 |
| <b>Table S-3</b> | Geometric coordinates and thermally corrected MP2 energies for octyl trifluoromethanesulfonate ( <b>13</b> ).                           | S-66 |
| <b>Table S-4</b> | Geometric coordinates and thermally corrected MP2 energies for 1-bromo-4-( <i>tert</i> -butyl)cyclohexane ( <i>trans</i> - <b>17</b> ). | S-67 |
| <b>Table S-5</b> | Geometric coordinates and thermally corrected MP2 energies for 1-bromo-4-( <i>tert</i> -butyl)cyclohexane ( <i>cis</i> - <b>17</b> ).   | S-68 |
| <b>Table S-6</b> | Geometric coordinates and thermally corrected MP2 energies for <i>exo</i> -2-bromonorbornane ( <b>22</b> ).                             | S-69 |
| <b>Table S-7</b> | Geometric coordinates and thermally corrected MP2 energies for <i>exo</i> -2-chloronorbornane ( <b>23</b> ).                            | S-70 |

|                   |                                                                                                                                                                                            |      |
|-------------------|--------------------------------------------------------------------------------------------------------------------------------------------------------------------------------------------|------|
| <b>Table S-8</b>  | Geometric coordinates and thermally corrected MP2 energies for ( <i>E</i> )-1-bromocyclooct-1-ene ( <b>26</b> ).                                                                           | S-71 |
| <b>Table S-9</b>  | Geometric coordinates and thermally corrected MP2 energies for symmetric cycloocta-1,2-diene ( <b>28a</b> ).                                                                               | S-72 |
| <b>Table S-10</b> | Geometric coordinates and thermally corrected MP2 energies for asymmetric cycloocta-1,2-diene ( <b>28b</b> ).                                                                              | S-73 |
| <b>Table S-11</b> | Geometric coordinates and thermally corrected MP2 energies for ring flip of symmetric cycloocta-1,2-diene ( <b>28a</b> ) to asymmetric cycloocta-1,2-diene ( <b>28b</b> ).                 | S-74 |
| <b>Table S-12</b> | Geometric coordinates and thermally corrected MP2 energies for THF.                                                                                                                        | S-75 |
| <b>Table S-13</b> | Geometric coordinates and thermally corrected MP2 energies for NaDA ground-state A <sub>2</sub> (THF) <sub>4</sub> .                                                                       | S-76 |
| <b>Table S-14</b> | Geometric coordinates and thermally corrected MP2 energies for the A(THF) <sub>3</sub> mediated anti elimination of 1-bromooctane ( <b>1</b> ).                                            | S-78 |
| <b>Table S-15</b> | Geometric coordinates and thermally corrected MP2 energies for the A(THF) <sub>3</sub> mediated <i>syn</i> elimination of 1-bromooctane ( <b>1</b> ).                                      | S-80 |
| <b>Table S-16</b> | Geometric coordinates and thermally corrected MP2 energies for the A(THF) <sub>2</sub> mediated <i>syn</i> elimination of 1-chlorooctane ( <b>5</b> ).                                     | S-82 |
| <b>Table S-17</b> | Geometric coordinates and thermally corrected MP2 energies for the A(THF) <sub>2</sub> mediated carbene generation of 1-chlorooctane ( <b>5</b> ).                                         | S-84 |
| <b>Table S-18</b> | Geometric coordinates and thermally corrected MP2 energies for the A(THF) <sub>2</sub> mediated carbene generation from octyl trifluoromethanesulfonate ( <b>13</b> ).                     | S-86 |
| <b>Table S-19</b> | Geometric coordinates and thermally corrected MP2 energies for the A(THF) <sub>2</sub> mediated substitution of octyl trifluoromethanesulfonate ( <b>13</b> ).                             | S-88 |
| <b>Table S-20</b> | Geometric coordinates and thermally corrected MP2 energies for the A(THF) <sub>3</sub> mediated substitution of octyl trifluoromethanesulfonate ( <b>13</b> ).                             | S-90 |
| <b>Table S-21</b> | Geometric coordinates and thermally corrected MP2 energies for the A(THF) <sub>3</sub> mediated anti elimination of 1-bromo-4-( <i>tert</i> -butyl)cyclohexane ( <i>cis</i> - <b>17</b> ). | S-92 |

|                   |                                                                                                                                                                                                |       |
|-------------------|------------------------------------------------------------------------------------------------------------------------------------------------------------------------------------------------|-------|
| <b>Table S-22</b> | Geometric coordinates and thermally corrected MP2 energies for the A(THF) <sub>3</sub> mediated carbene generation of 1-bromo-4-( <i>tert</i> -butyl)cyclohexane ( <i>trans</i> - <b>17</b> ). | S-94  |
| <b>Table S-23</b> | Geometric coordinates and thermally corrected MP2 energies for the A(THF) <sub>3</sub> mediated carbene generation of 1-bromo-4-( <i>tert</i> -butyl)cyclohexane ( <i>cis</i> - <b>17</b> ).   | S-96  |
| <b>Table S-24</b> | Geometric coordinates and thermally corrected MP2 energies for the A(THF) <sub>2</sub> mediated <i>syn</i> elimination of <i>exo</i> -2-bromonorbornane ( <b>22</b> ).                         | S-98  |
| <b>Table S-25</b> | Geometric coordinates and thermally corrected MP2 energies for the A(THF) <sub>2</sub> mediated <i>syn</i> elimination of <i>exo</i> -2-chloronorbornane ( <b>23</b> ).                        | S-100 |
| <b>Table S-26</b> | Geometric coordinates and thermally corrected MP2 energies for the A(THF) <sub>3</sub> mediated <i>syn</i> elimination of ( <i>E</i> )-1-bromocyclooct-1-ene ( <b>26</b> ).                    | S-102 |

# Chart I

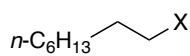

1 = Br  
3 = N(*i*-Pr)<sub>2</sub>  
5 = Cl  
6 = I  
7 = F

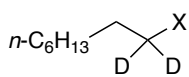

1,1-1-*d*<sub>2</sub> = Br  
1,1-5-*d*<sub>2</sub> = Cl

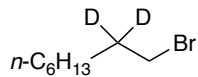

2,2-1-*d*<sub>2</sub>

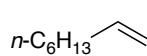

2

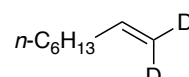

1,1-2-*d*<sub>2</sub>

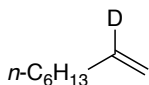

2-2-*d*<sub>1</sub>

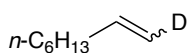

2-*d*<sub>1</sub>

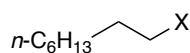

12 = OSO<sub>2</sub>Ph  
13 = OSO<sub>2</sub>CF<sub>3</sub>

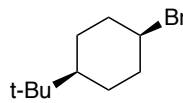

*cis*-17

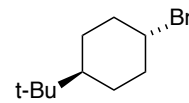

*trans*-17

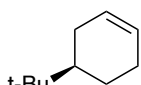

18

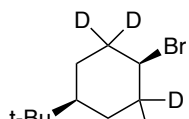

*cis*-17-*d*<sub>4</sub>

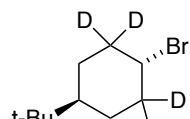

*trans*-17-*d*<sub>4</sub>

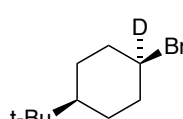

*cis*-17-*d*<sub>1</sub>

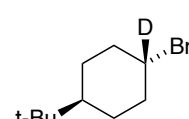

*trans*-17-*d*<sub>1</sub>

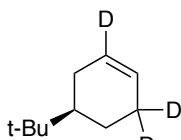

18-*d*<sub>3</sub>

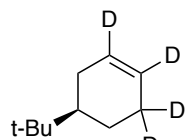

18-*d*<sub>4</sub>

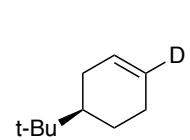

18-*d*<sub>1</sub>

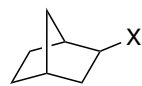

22 = Br  
23 = Cl

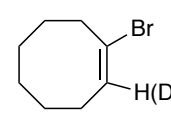

26 (26-*d*<sub>1</sub>)

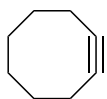

27

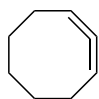

28

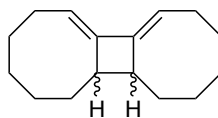

29

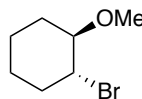

31

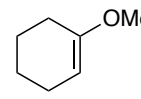

32

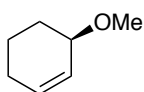

33

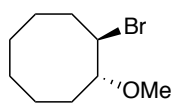

35

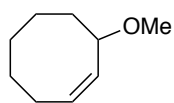

36

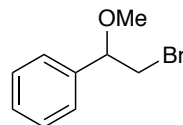

37

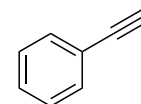

38

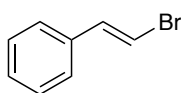

39

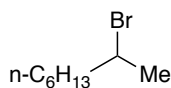

A

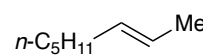

B

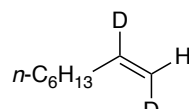

*cis*-1,2-C-*d*<sub>2</sub>

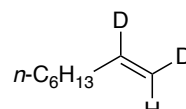

*trans*-1,2-C-*d*<sub>2</sub>

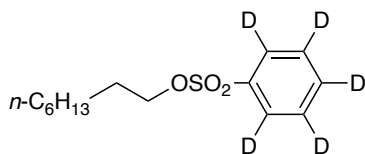

D

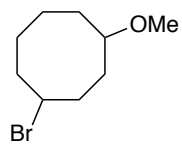

E



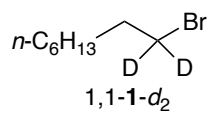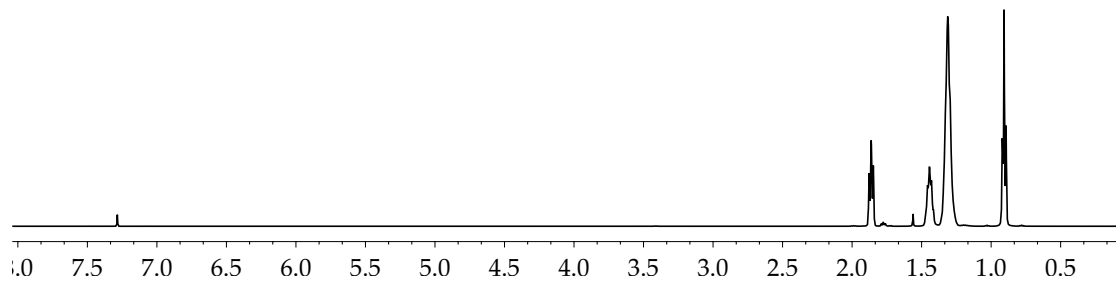

**Figure S-1.**  $^1\text{H}$  NMR (500 MHz,  $\text{CDCl}_3$ ) of 1-bromo-1,1- $d_2$  (1,1- $1\text{-}d_2$ ):  $\delta$  1.86 (2H, t,  $J = 7.61$  Hz), 1.44 (2H, m); 1.31 (8H, m), 0.91 (3H, t,  $J = 7.60$  Hz).

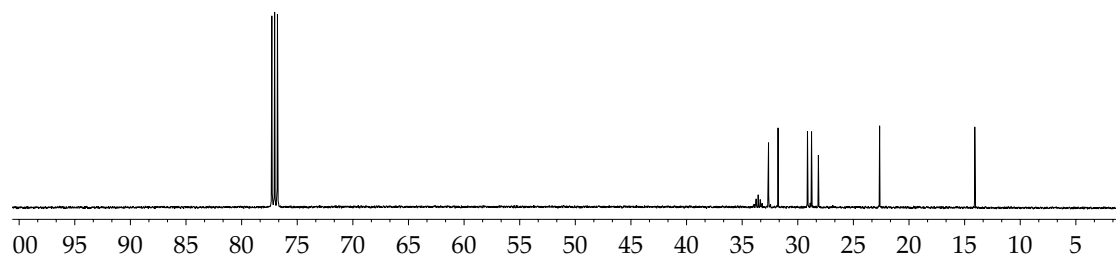

**Figure S-2.**  $^{13}\text{C}$  NMR (126 MHz,  $\text{CDCl}_3$ ) of 1-bromo-1,1- $d_2$  (1,1- $1\text{-}d_2$ ):  $\delta$  33.6 (q,  $J_{\text{C-D}} = 7.6$  Hz), 32.6, 31.7, 29.1, 28.7, 28.1, 22.6, 14.1.

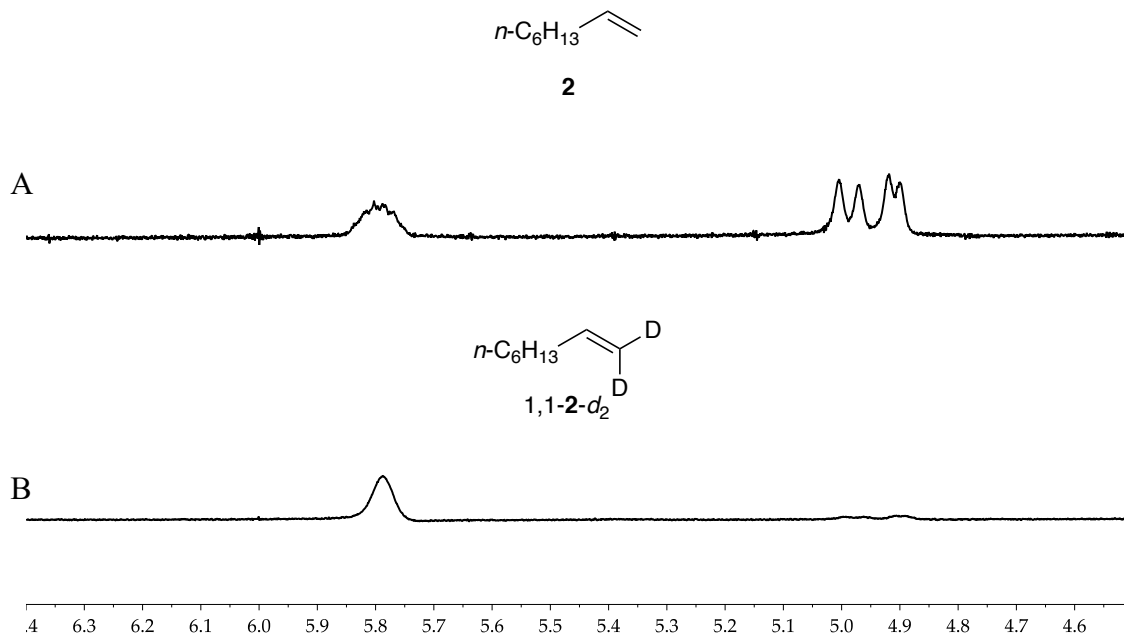

**Figure S-3.**  $^1\text{H}$  NMR (500 MHz) of NaDA (0.12 M) with the following substrates (0.10 M) in THF/hexane: (A) 1-bromooctane (**1**) **Figure S-9**. Expanded  $^1\text{H}$  NMR spectrum of 1-octene (**2**) in THF.  $k_{\text{H}}/k_{\text{D}} = 1.25$ .

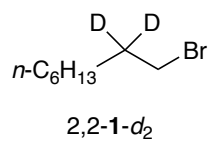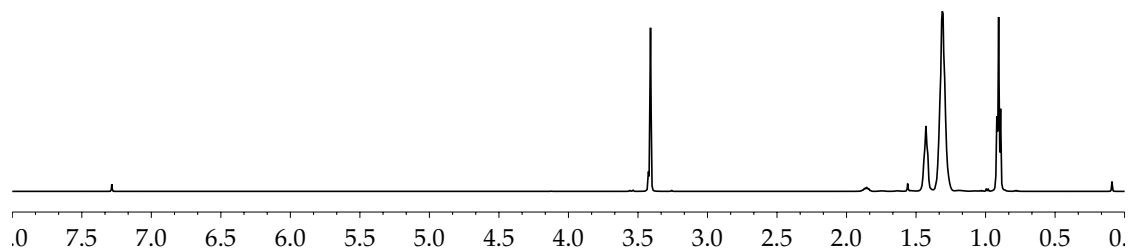

**Figure S-4.**  $^1\text{H}$  NMR (500 MHz,  $\text{CDCl}_3$ ) of 1-bromo-octane-2,2- $d_2$  (2,2-1- $d_2$ ):  $\delta$  3.41 (2H, s), 1.44 (2H, m); 1.31 (8H, m), 0.91 (3H, t,  $J = 7.60$  Hz).

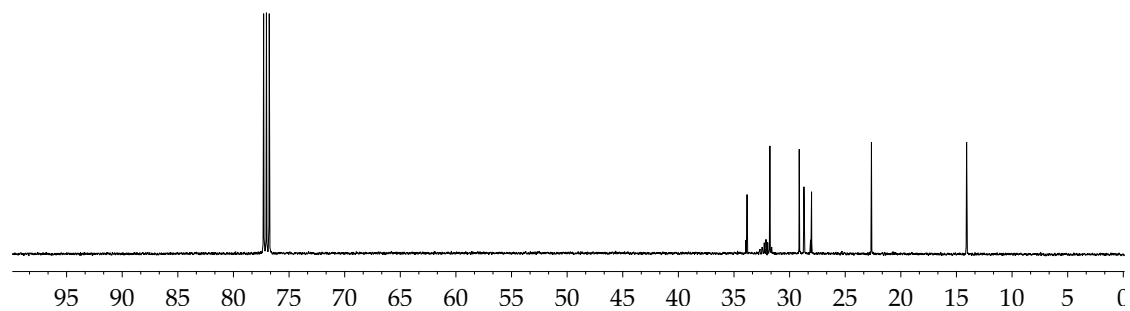

**Figure S-5.**  $^{13}\text{C}$  NMR (126 MHz,  $\text{CDCl}_3$ ) of 1-bromo-octane-2,2- $d_2$  (2,2-1- $d_2$ ):  $\delta$  33.8, 32.6 (q,  $J_{\text{C-D}} = 7.6$  Hz), 31.7, 29.1, 28.7, 28.2, 22.6, 14.1.

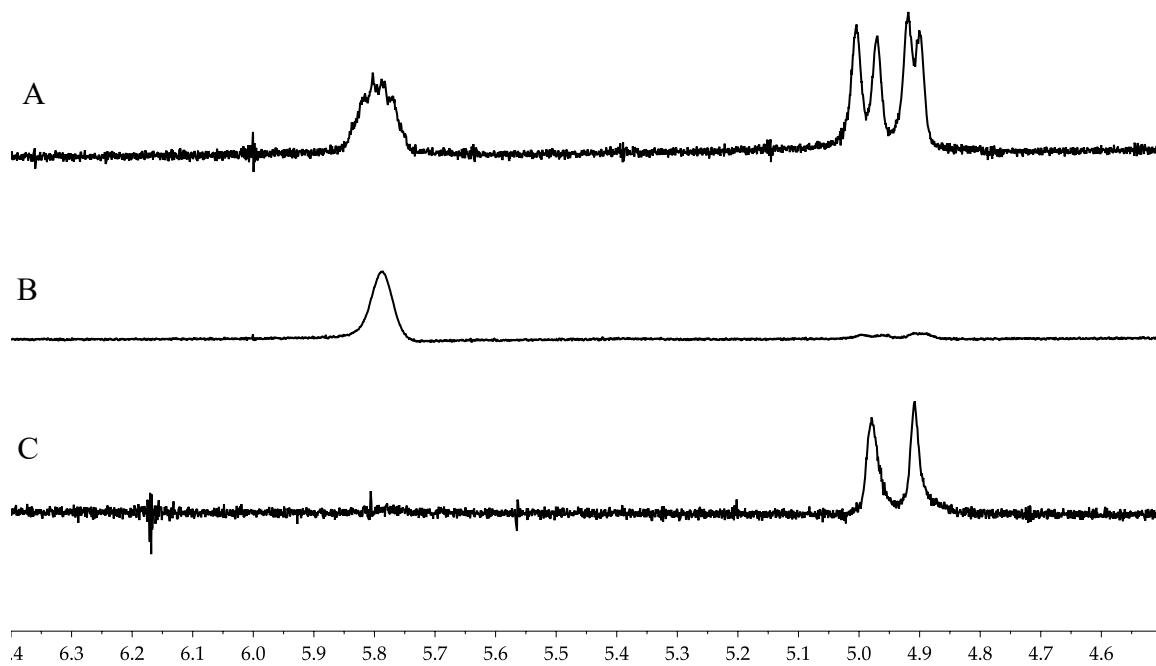

**Figure S-6.**  $^1\text{H}$  NMR (500 MHz, 6.1 M THF/hexane) of NaDA (0.12 M) with the following substrates (0.10 M): (A) 1-bromooctane (**1**), (B) 1-bromooctane-1,1- $d_2$  (1,1- $d_2$ ), and (C) 1-bromooctane-2,2- $d_2$  (2,2- $d_2$ ).

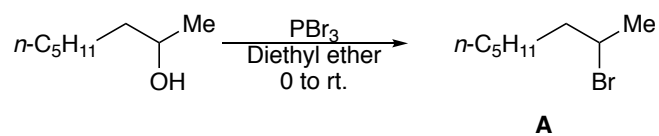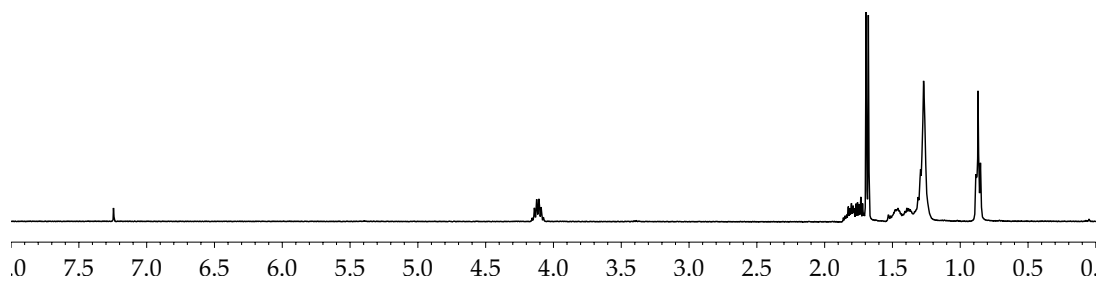

**Figure S-7.**  $^1\text{H}$  NMR (500 MHz,  $\text{CDCl}_3$ ) of 2-bromooctane (**A**):  $\delta$  4.16 (1H, m), 1.84 (2H, m); 1.73 (3H, d,  $J = 6.70$  Hz), 1.48 (2H, m), 1.32 (4H, m), 0.91 (3H, t,  $J = 7.10$  Hz).

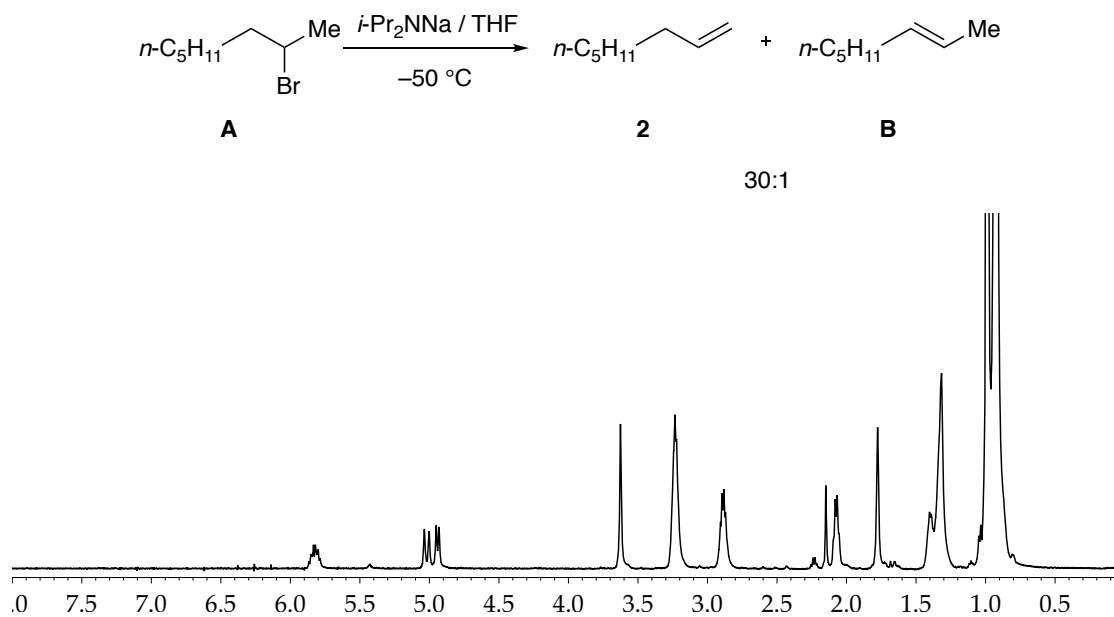

**Figure S-8.**  $^1\text{H}$  NMR (500 MHz,  $\text{THF-}d_8$ ) of 1-octene (**2**):  $\delta$ : 5.83 (1H, m), 5.02 (d,  $J = 16.50$  Hz), 1.48 (2H, m), 1.32 (4H, m), 0.91 (3H, t,  $J = 9.58$  Hz).

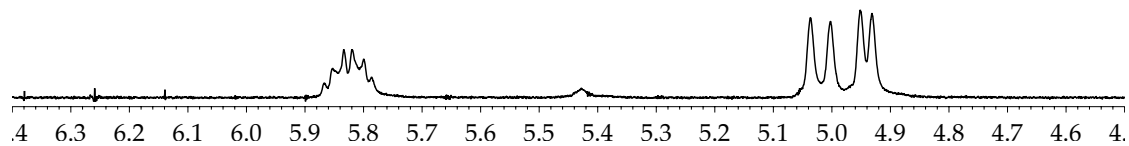

**Figure S-9.** Expanded  $^1\text{H}$  NMR (500 MHz,  $\text{THF-}d_8$ ) of 1-octene (**2**).

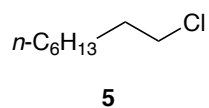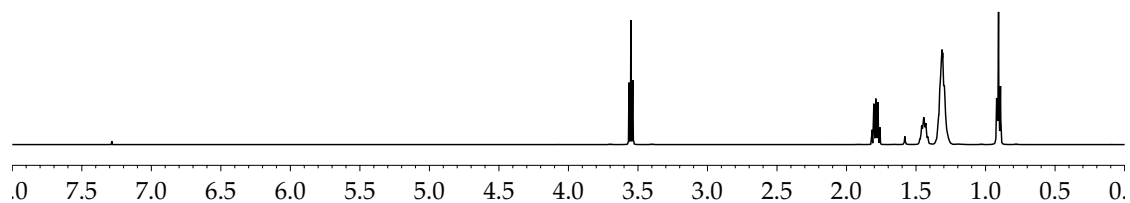

**Figure S-10.** <sup>1</sup>H NMR (500 MHz, CDCl<sub>3</sub>) of 1-chlorooctane (**5**): δ 3.55 (2H, t, *J* = 6.87 Hz) 1.79 (2H, m); 1.44 (2H, m), 1.31 (8H, m), 0.91 (3H, t, *J* = 7.37 Hz).

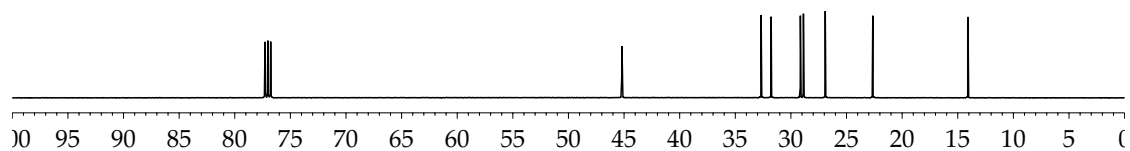

**Figure S-11.** <sup>13</sup>C NMR (126 MHz, CDCl<sub>3</sub>) of 1-chlorooctane (**5**): δ 45.2, 32.7, 31.8, 29.1, 28.8, 26.9, 22.65, 14.1.

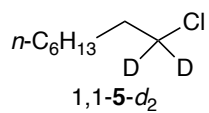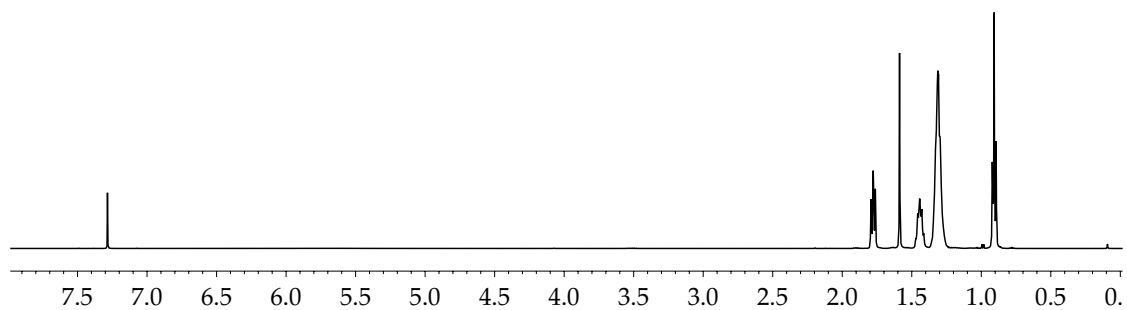

**Figure S-12.**  $^1\text{H}$  NMR (500 MHz,  $\text{CDCl}_3$ ) of 1-chlorooctane-1,1- $d_2$  (1,1-5- $d_2$ ):  $\delta$  1.76 (2H, t,  $J = 7.27$  Hz); 1.44 (2H, m), 1.31 (8H, m), 0.91 (3H, t,  $J = 7.37$  Hz).

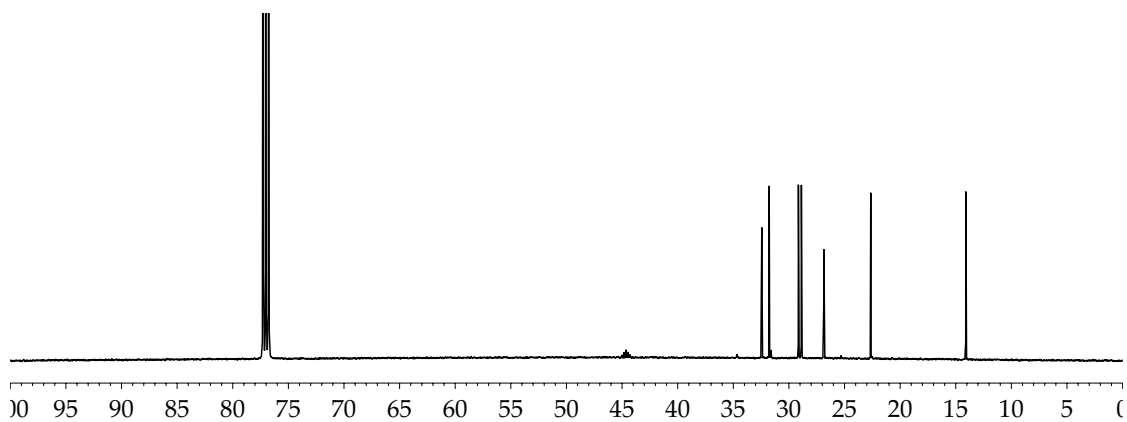

**Figure S-13.**  $^{13}\text{C}$  NMR (126 MHz,  $\text{CDCl}_3$ ) of 1-chlorooctane-1,1- $d_2$  (1,1-5- $d_2$ ):  $\delta$  44.6 (q,  $J_{\text{C-D}} = 22.3$  Hz), 32.4, 31.8, 29.1, 28.9, 26.8, 22.6, 14.1.



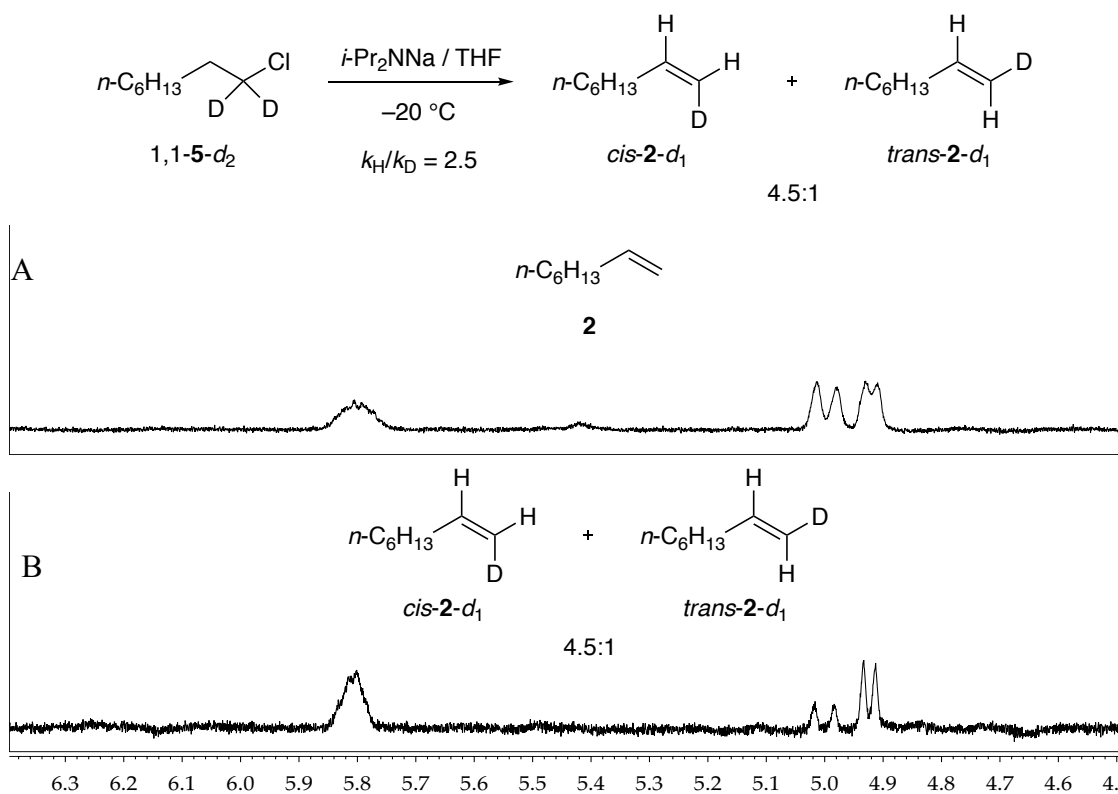

**Figure S-14.**  $^1\text{H}$  NMR (500 MHz, 6.1 M THF/hexane) of NaDA (0.10 M) with the following substrates (0.050 M): (A) 1-octene (**2**) and (B) 1-chlorooctane-1,1- $d_2$  (1,1-**5- $d_2$** ).

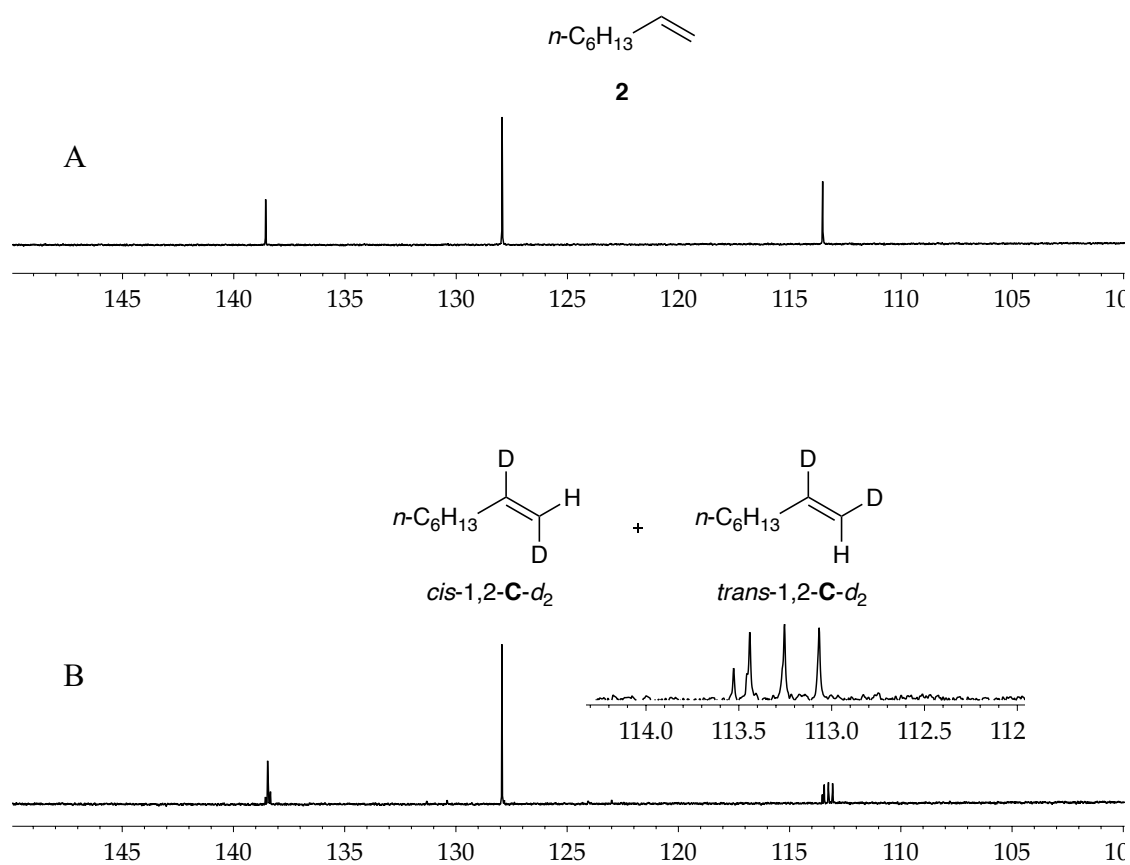

**Figure S-15.**  $^{13}\text{C}$  NMR (126 MHz, 6.1 M THF/hexane) of NaDA (0.10 M) with substrates (0.050 M): (A) 1-octene (**2**):  $\delta$  138.8, 128.0, 114.7; and (B) oct-1-ene-1,2- $d_2$  ( $1,2\text{-C-}d_2$ ):  $\delta$  138.2, 128.1, 113.3(t,  $J_{\text{C-D}} = 12.2$  Hz).

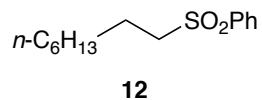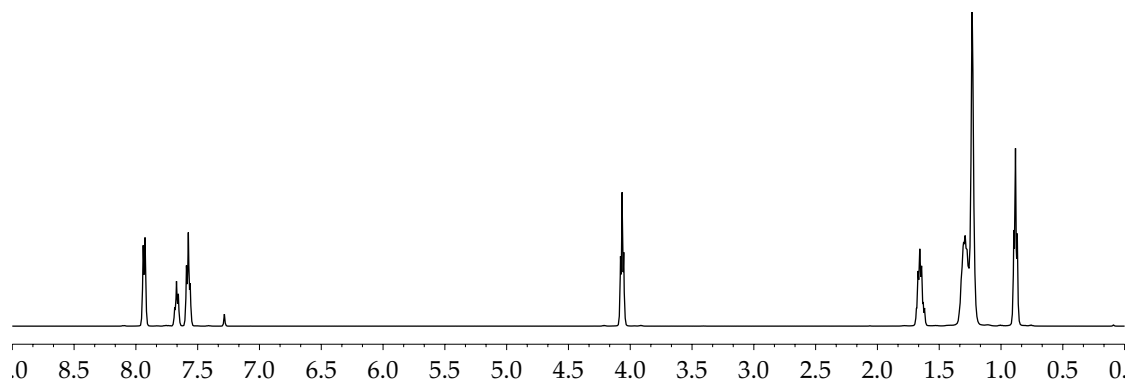

**Figure S-16.**  $^1\text{H}$  NMR (500 MHz,  $\text{CDCl}_3$ ) of *n*-octyl benzenesulfonate (**12**):  $\delta$  7.93 (2H, d,  $J = 8.05$  Hz) 7.67 (2H, t,  $J = 7.02$  Hz), 7.58 (2H, t,  $J = 7.05$  Hz), 4.06 (2H, t,  $J = 6.31$  Hz), 1.66 (2H, m), 1.44 (2H, m), 1.29 (2H, m), 1.23 (4H, m), 0.88 (3H, t,  $J = 7.30$  Hz).

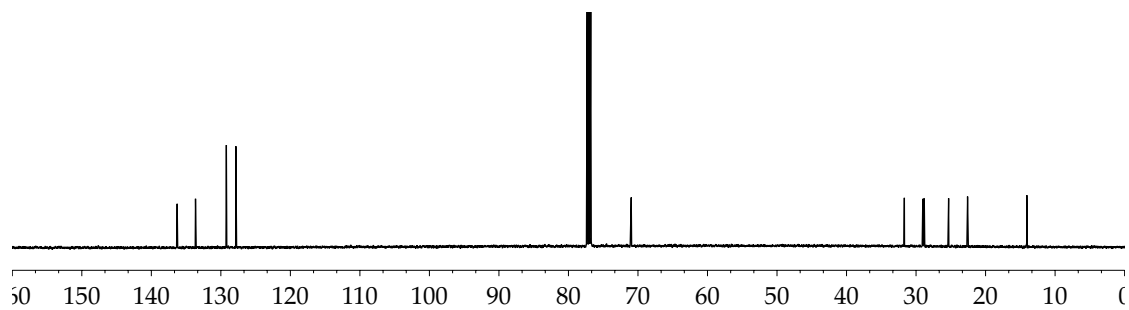

**Figure S-17.**  $^{13}\text{C}$  NMR (126 MHz,  $\text{CDCl}_3$ ) of *n*-octyl benzenesulfonate (**12**):  $\delta$  136.3, 133.6, 129.2, 127.85, 70.9, 31.6, 25.3, 22.6, 14.0.

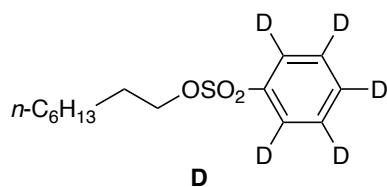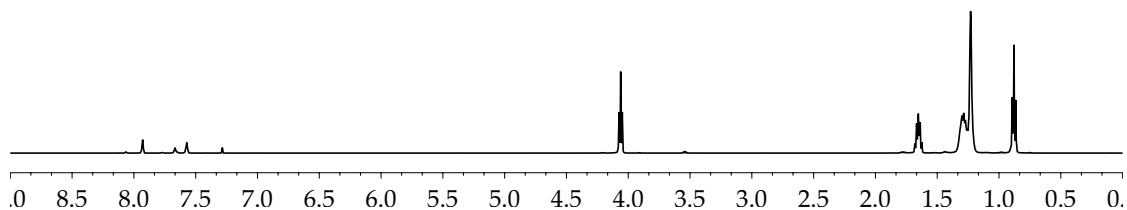

**Figure S-18.**  $^1\text{H}$  NMR (500 MHz,  $\text{CDCl}_3$ ) of deuterated *n*-octyl benzenesulfonate (**D**):  $\delta$  4.06 (2H, t,  $J = 6.31$  Hz), 1.66 (2H, m); 1.44 (2H, m), 1.29 (2H, m), 1.23 (4H, m), 0.88 (3H, t,  $J = 7.30$  Hz).

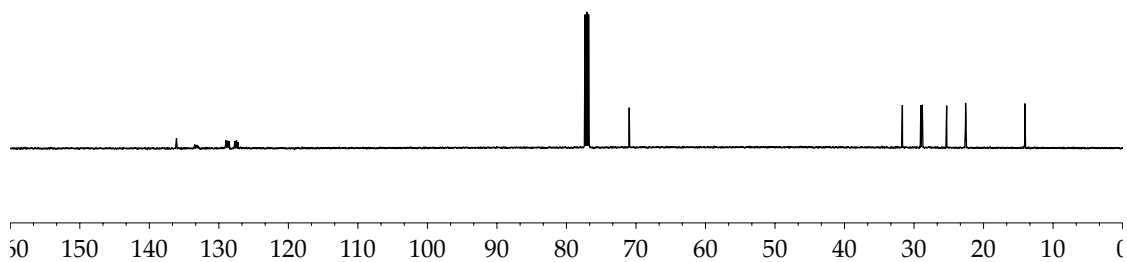

**Figure S-19.**  $^{13}\text{C}$  NMR (126 MHz,  $\text{CDCl}_3$ ) of deuterated *n*-octylbenzenesulfonate (**D**):  $\delta$  135.9, 133.2 (m), 128.8 (m), 127.5 (m), 70.7, 31.6, 25.3, 22.5, 14.0.

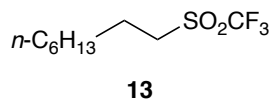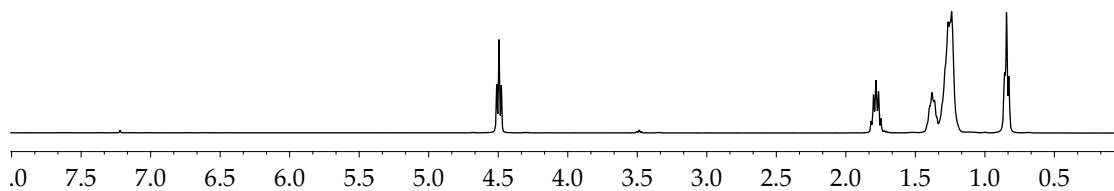

**Figure S-20.**  $^1\text{H}$  NMR (500 MHz,  $\text{CDCl}_3$ ) of *n*-octyl trifluoromethanesulfonate (**13**):  $\delta$  4.56 (2H, t,  $J = 6.71$  Hz); 1.85 (2H, m), 1.45 (2H, m), 1.31 (8H, m), 0.91 (3H, t,  $J = 7.18$  Hz).

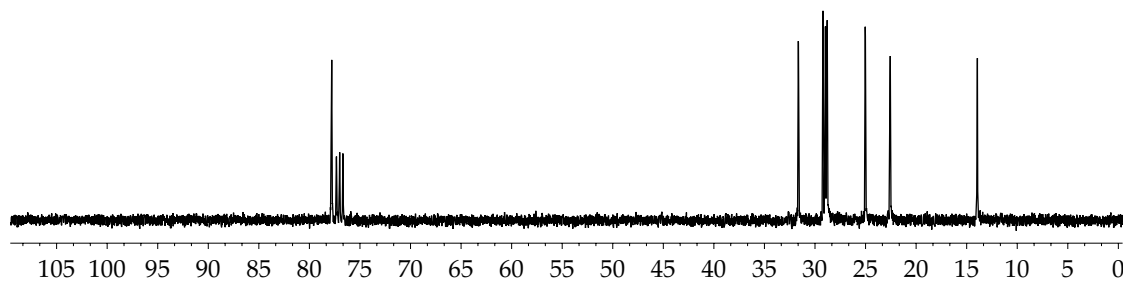

**Figure S-21.**  $^{13}\text{C}$  NMR (126 MHz,  $\text{CDCl}_3$ ) of *n*-octyl trifluoromethanesulfonate (**13**):  $\delta$  118.6 ( $J_{\text{C-D}} = 321.4$ ), 77.6, 29.2, 29.0, 28.7, 25.1, 22.5, 14.0.

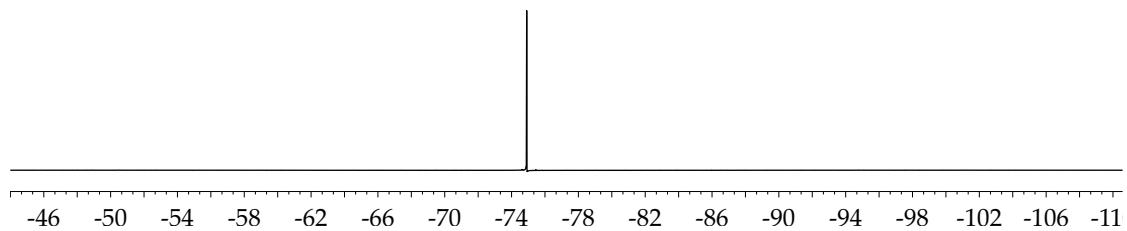

**Figure S-22.**  $^{19}\text{F}$  NMR (470 MHz,  $\text{CDCl}_3$ ) of *n*-octyl trifluoromethanesulfonate (**13**):  $\delta$  -75.3.

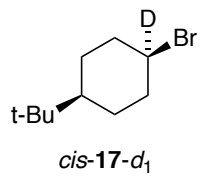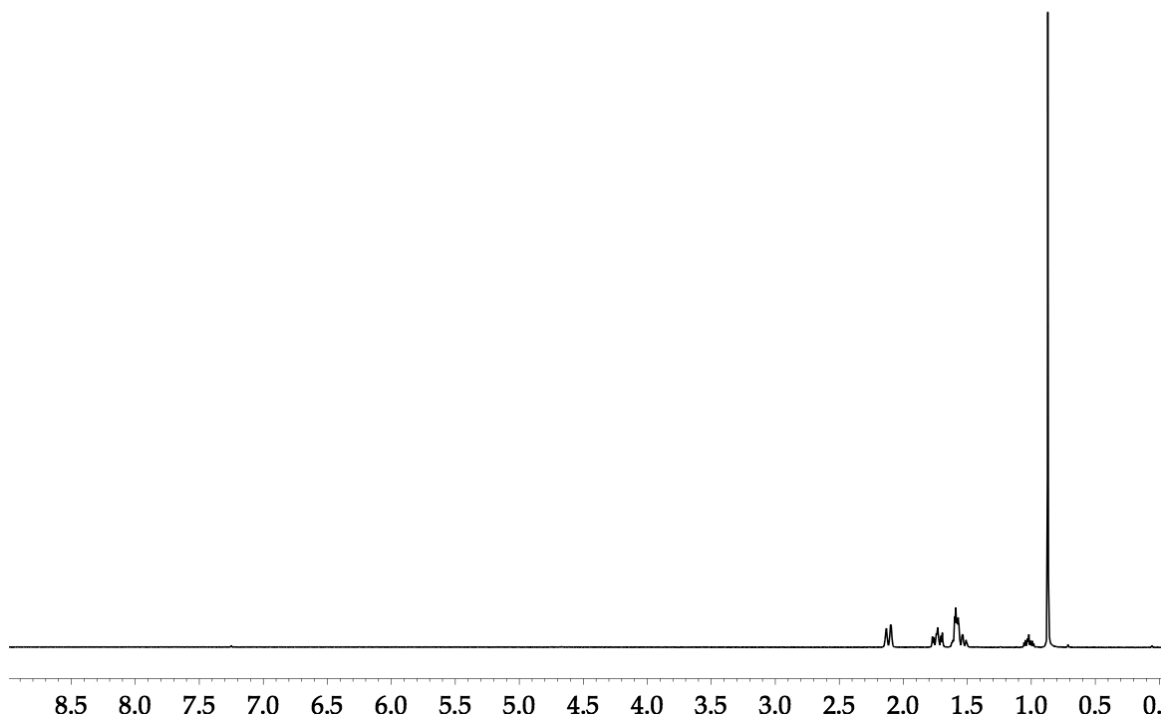

**Figure S-23.**  $^1\text{H}$  NMR (500 MHz,  $\text{CDCl}_3$ ) of *cis*-1-bromo-1-deuterio-4-*tert*-butylcyclohexane (*cis-17-d<sub>1</sub>*):  $\delta$  2.15 (2H, m), 1.75 (2H, m), 1.61 (4H, m), 1.01 (1H, m), 0.89 (9H, s).

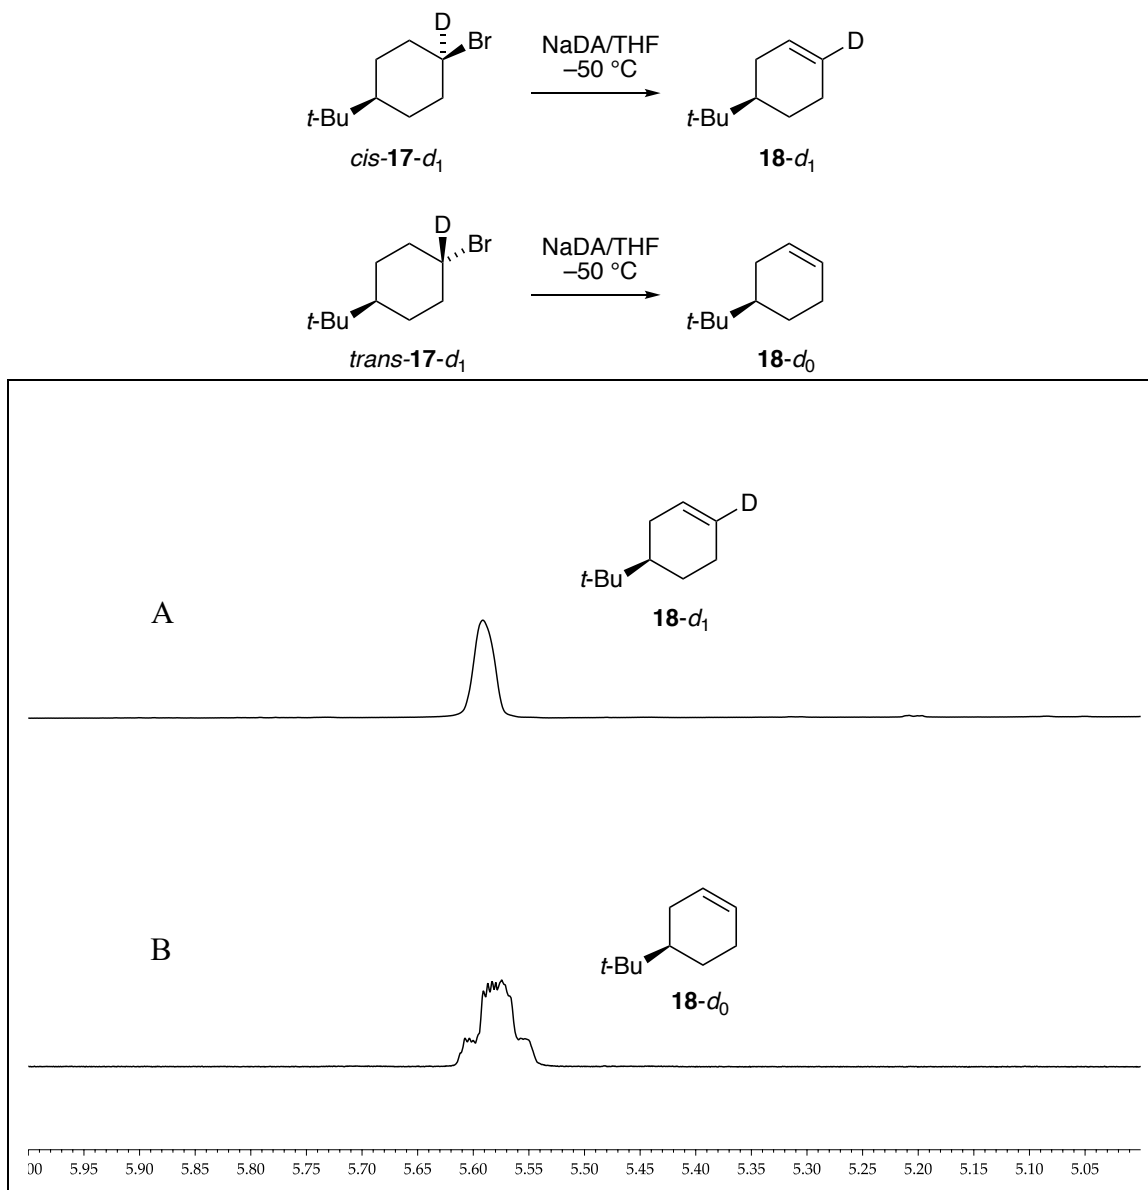

**Figure S-24.** <sup>1</sup>H NMR (500 MHz, 6.1 M THF/hexane) of NaDA (0.12 M) with *cis*-1-bromo-4-(*tert*-butyl)cyclohexane-1-*d*<sub>1</sub> (**cis-17-d<sub>1</sub>**): (A) and *trans*-1-bromo-4-(*tert*-butyl)cyclohexane-1-*d*<sub>1</sub> (**trans-17-d<sub>1</sub>**) (0.10 M) at -50 °C: (A) 4-(*tert*-butyl)-1-deuterio-cyclohex-1-ene (**18-d<sub>1</sub>**), and (B) 4-(*tert*-butyl)cyclohex-1-ene (**18**).

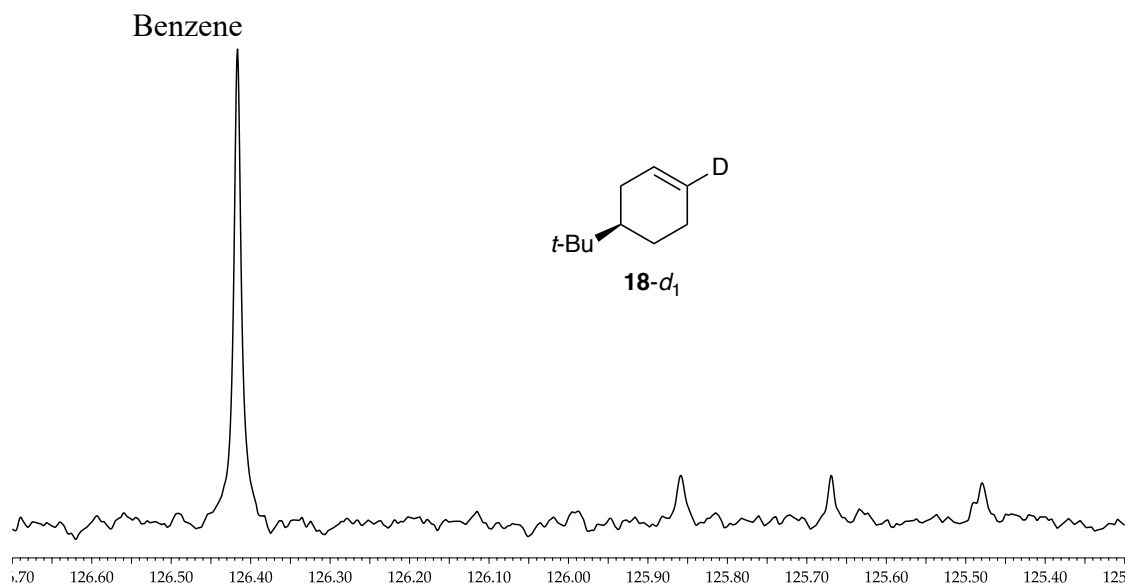

**Figure S-25.**  $^{13}\text{C}$  NMR (126 MHz, 6.1 M THF/hexane) of NaDA (0.12 M) with *cis*- $\mathbf{17-d_1}$  (0.10 M) at  $-50\text{ }^\circ\text{C}$ : 4-(*tert*-butyl)-1-deuteriocyclohex-1-ene ( $\mathbf{18-d_1}$ ).



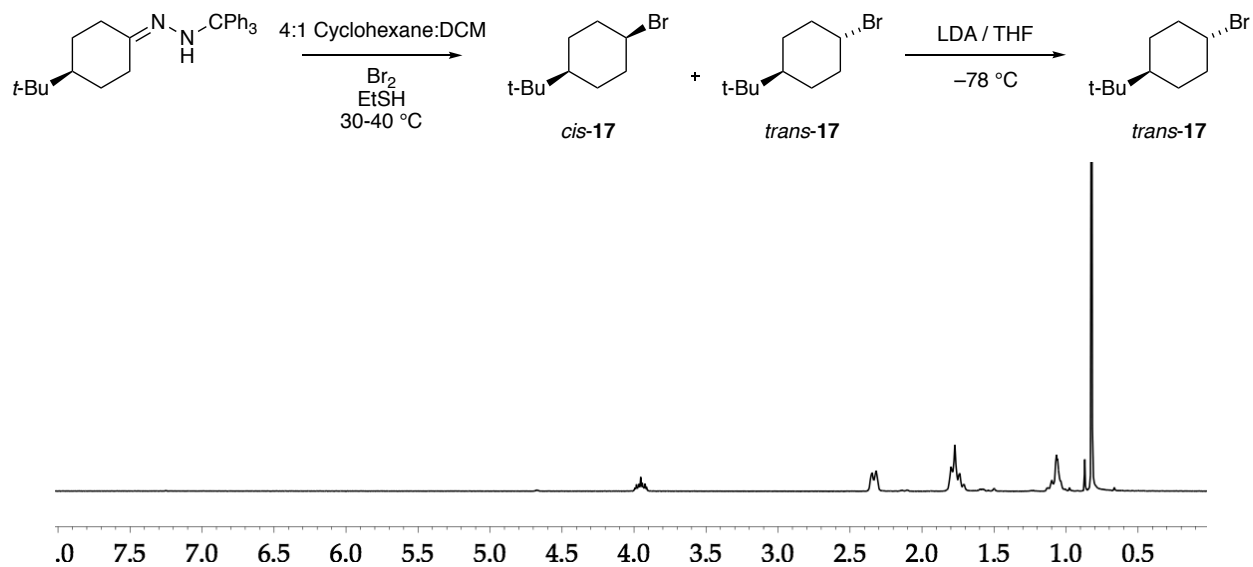

**Figure S-26.**  $^1\text{H}$  NMR (500 MHz,  $\text{CDCl}_3$ ) of *trans*-1-bromo-4-*tert*-butylcyclohexane (*trans*-17):  $\delta$  3.93 (1H, m), 2.40 (4H, m), 1.78 (4H, m), 1.05 (1H, m), 0.89 (9H, s).

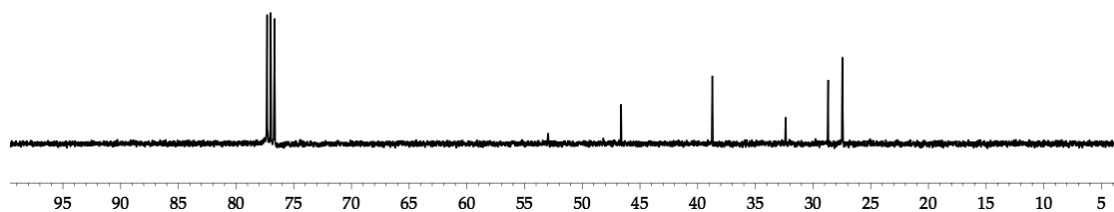

**Figure S-27.**  $^{13}\text{C}$  NMR (126 MHz,  $\text{CDCl}_3$ ) of *trans*-1-bromo-4-*tert*-butylcyclohexane (*trans*-17):  $\delta$  53.1, 46.8, 39.0, 32.4, 28.8, 27.8.

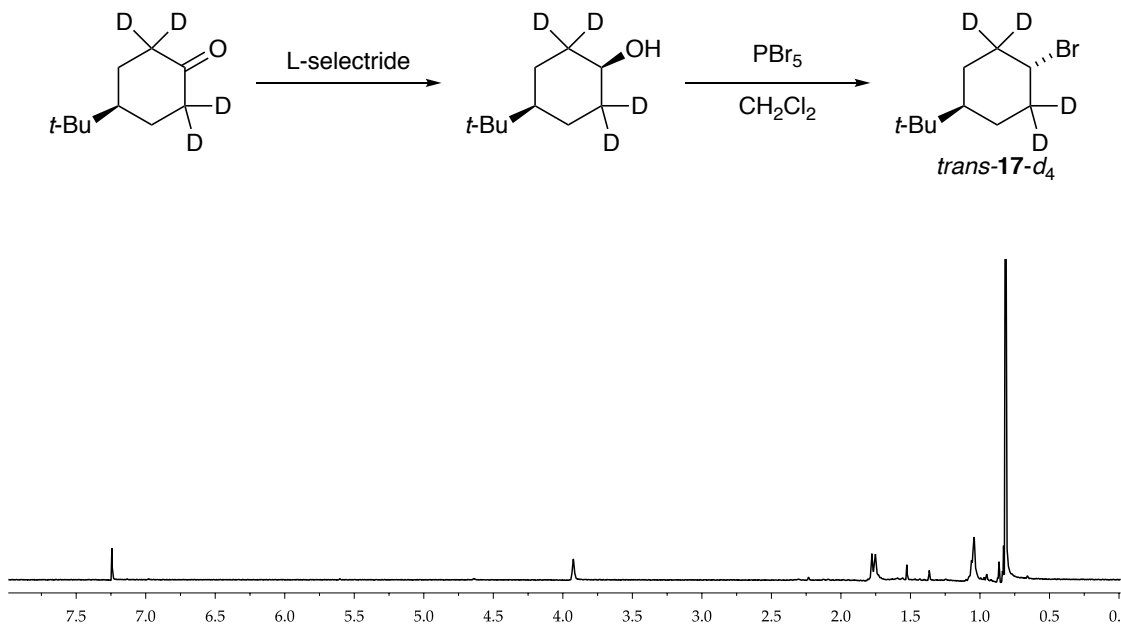

**Figure S-28.** <sup>1</sup>H NMR (500 MHz, CDCl<sub>3</sub>) of *trans*-1-bromo-4-*tert*-butylcyclohexane (*trans*-17-*d*<sub>4</sub>): δ 3.93 (1H, m), 1.78 (4H, m), 1.05 (1H, m), 0.89 (9H, s).

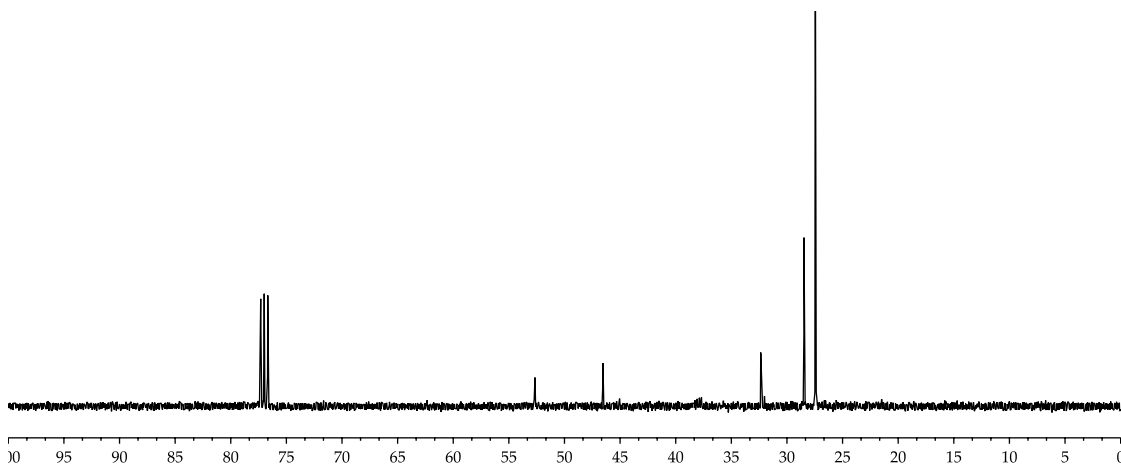

**Figure S-29.** <sup>13</sup>C NMR (126 MHz, CDCl<sub>3</sub>) of *trans*-1-bromo-4-*tert*-butylcyclohexane (*trans*-17-*d*<sub>4</sub>): δ 52.6, 46.5, 39.0 (m), 32.3, 28.5, 27.4.

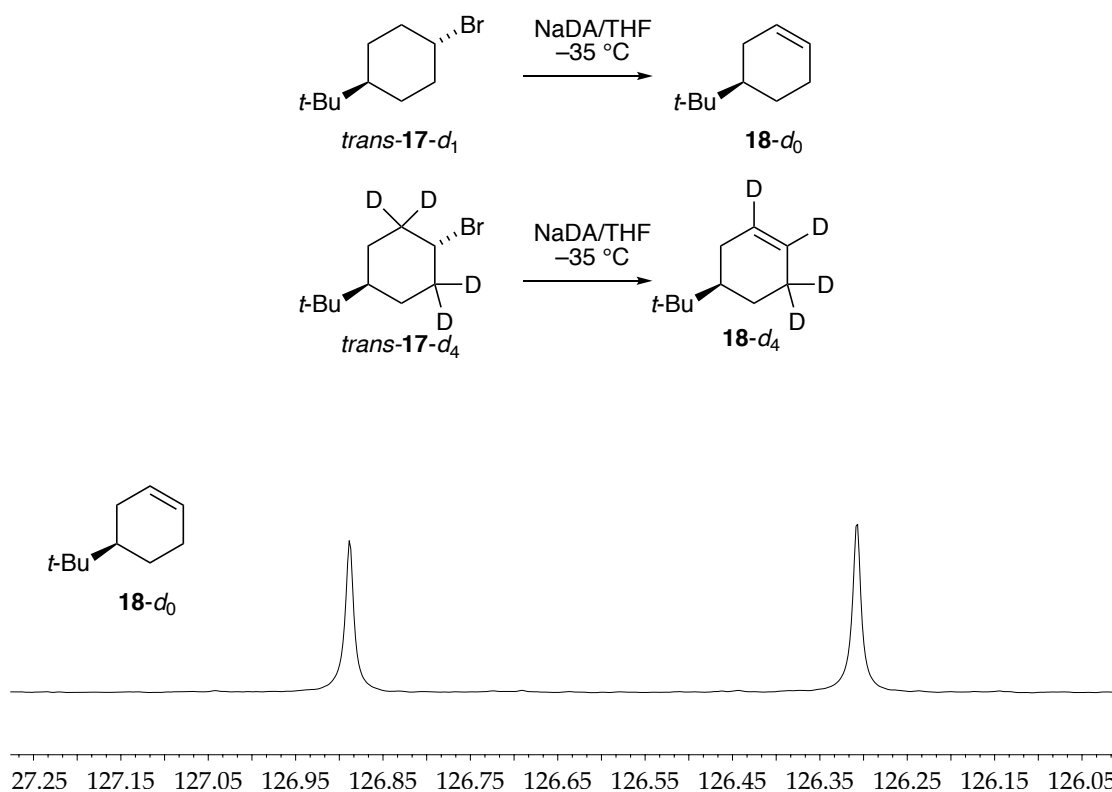

**Figure S-30.** Partial  $^{13}\text{C}$  NMR (126 MHz, 6.1 M THF/hexane) of NaDA (0.12 M) with *cis*-1-bromo-4-*tert*-butylcyclohexane (*trans*-17, 0.10 M) at  $-35\text{ }^\circ\text{C}$ .

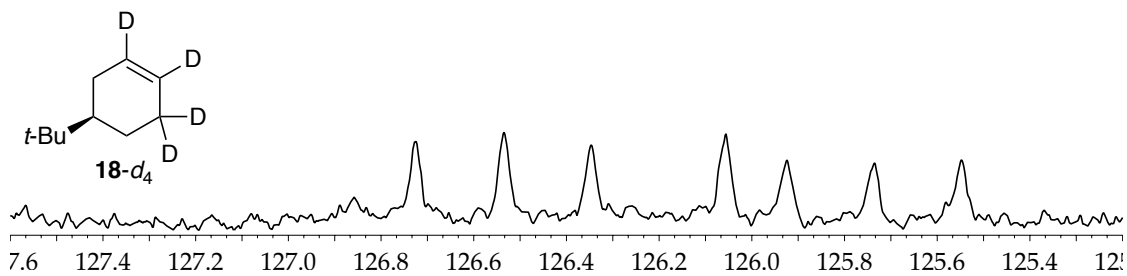

**Figure S-31.**  $^{13}\text{C}$  NMR (126 MHz, 6.1 M THF/hexane) of NaDA (0.15 M) with 1-bromo-4-*tert*-butylcyclohexane (*trans*-17- $d_4$ , 0.10 M) at  $-35\text{ }^\circ\text{C}$ .

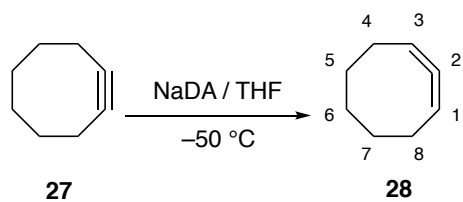

| Atom # | Chemical Shift (ppm) |              | HMBC correlations  |
|--------|----------------------|--------------|--------------------|
|        | $^{13}\text{C}$      | $^1\text{H}$ |                    |
| 1      | 95.08                | 5.31         | 3, 7eq, 8ax, 8eq   |
| 2      | 208.56               | —            | 4ax, 4eq, 8ax, 8eq |
| 3      | 90.51                | 5.11         | 1, 4ax, 4eq        |
| 4      | 31.59                | 1.84, 2.29   | 1, 5eq, 6ax, 6eq   |
| 5      | 27.4                 | 1.29, 1.84   | 3, 6ax, 6eq        |
| 6      | 29.1                 | 0.84, 1.95   | 5eq                |
| 7      | 33.35                | 1.33, 1.78   | 3, 5eq, 6ax, 6eq   |
| 8      | 30.05                | 1.91, 2.01   | 3, 6ax, 6eq        |

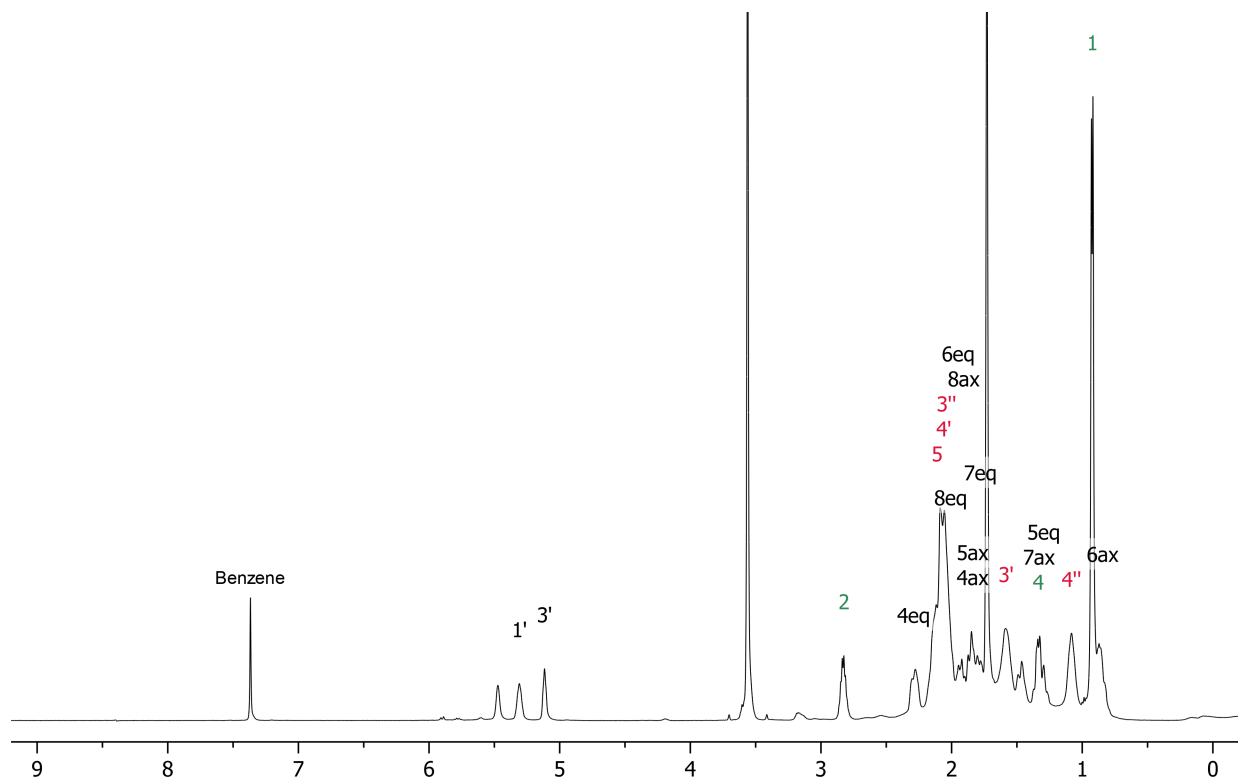

**Figure S-32.**  $^1\text{H}$  NMR spectrum at  $-110\text{ }^\circ\text{C}$  in  $\text{THF-}d_8$ . Numbers indicate assignments of cycloocta-1,2-diene (**28**, black), cyclooctyne (**27**, red) and diisopropylamine (green). Unassigned correlations are attributed to a minor, symmetric conformational isomer of **28**.

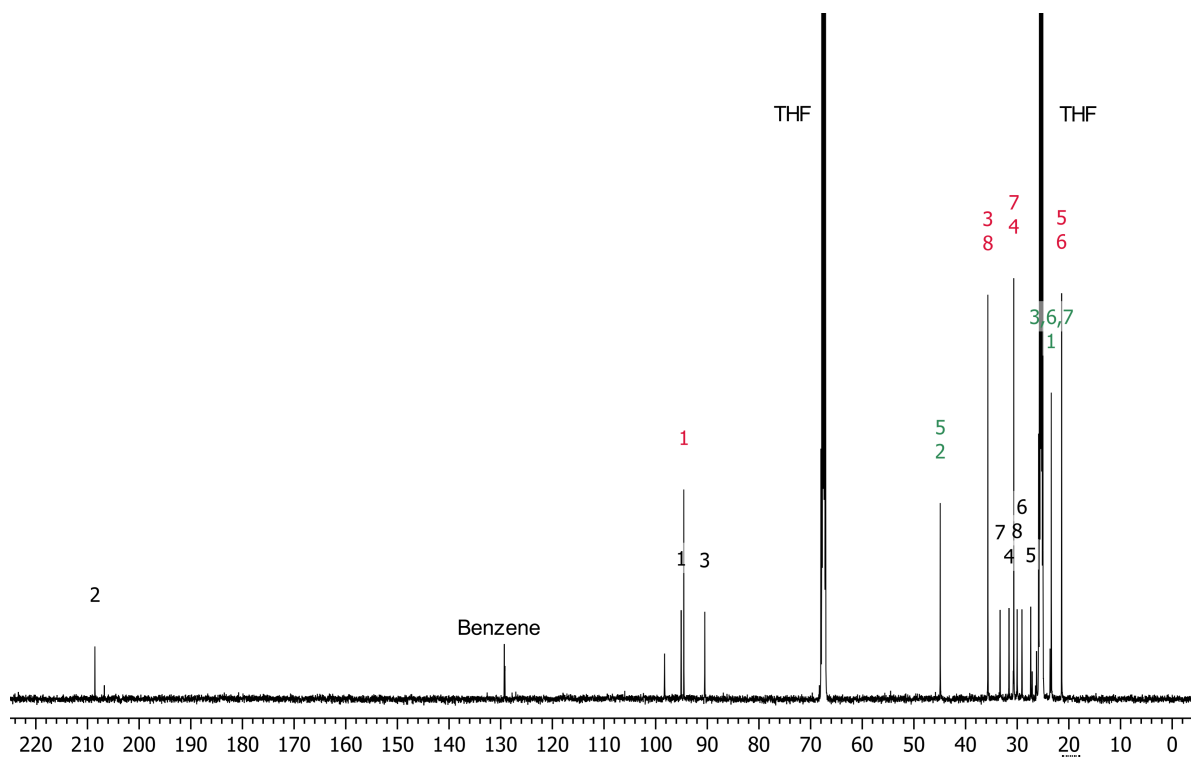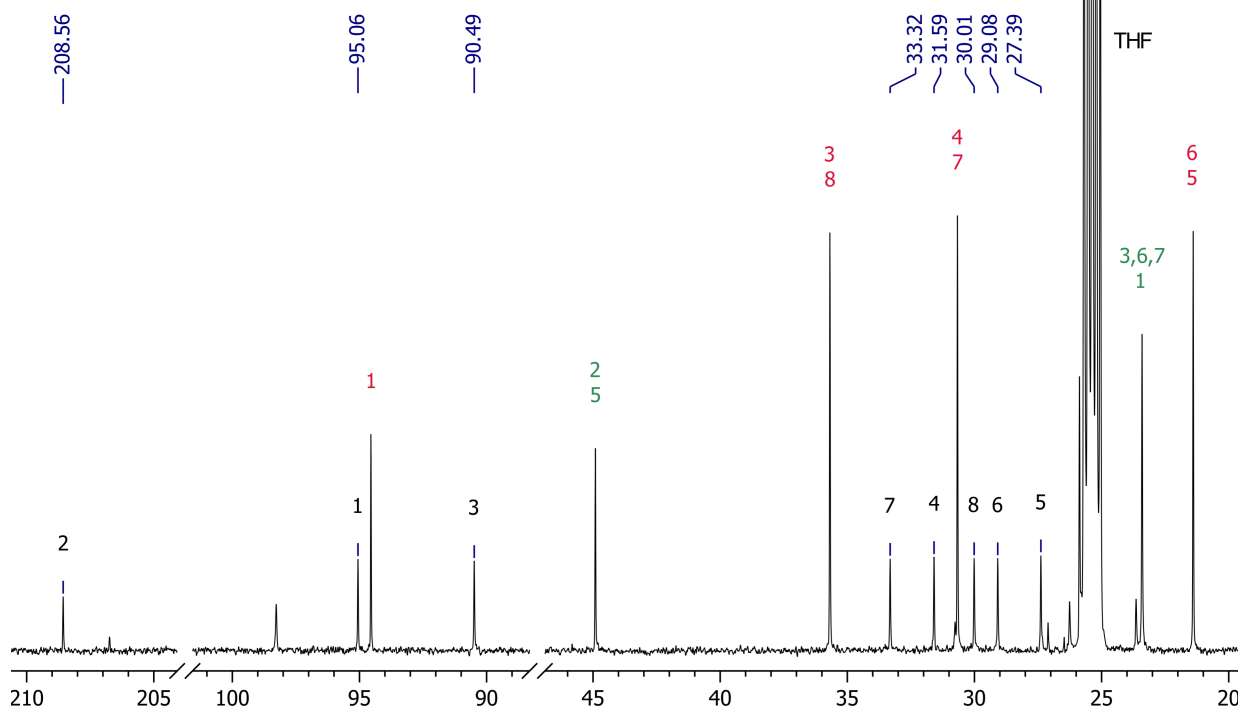

**Figure S-33a and S-33b.**  $^{13}\text{C}$  NMR spectrum at  $-110\text{ }^\circ\text{C}$  in  $\text{THF-}d_8$ . Numbers indicate assignments of cycloocta-1,2-diene (**28**, black), cyclooctyne (**27**, red) and diisopropylamine (green). Unassigned correlations are attributed to a minor, symmetric conformational isomer of **28**.

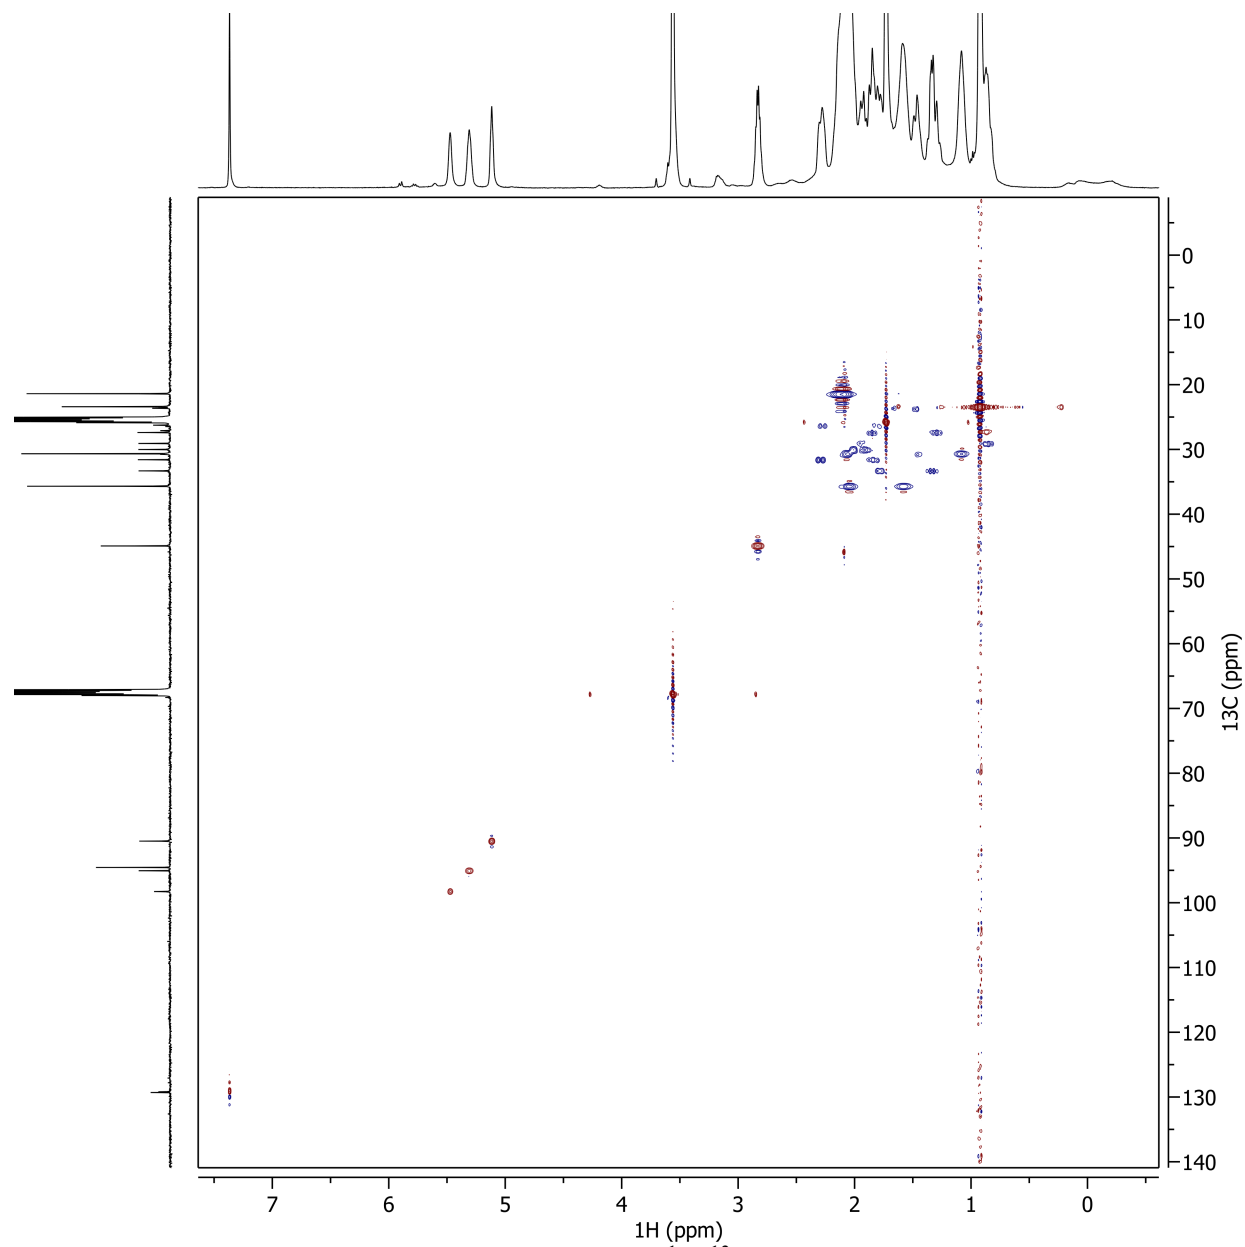

**Figure S-34.** Full display of multiplicity-edited 2D  $^1\text{H}/^{13}\text{C}$  HSQC spectrum at  $-110\text{ }^\circ\text{C}$  in  $\text{THF-}d_8$ . Red and blue contours indicate positive and negative intensities corresponding to CH/CH<sub>3</sub> and CH<sub>2</sub> groups, respectively.

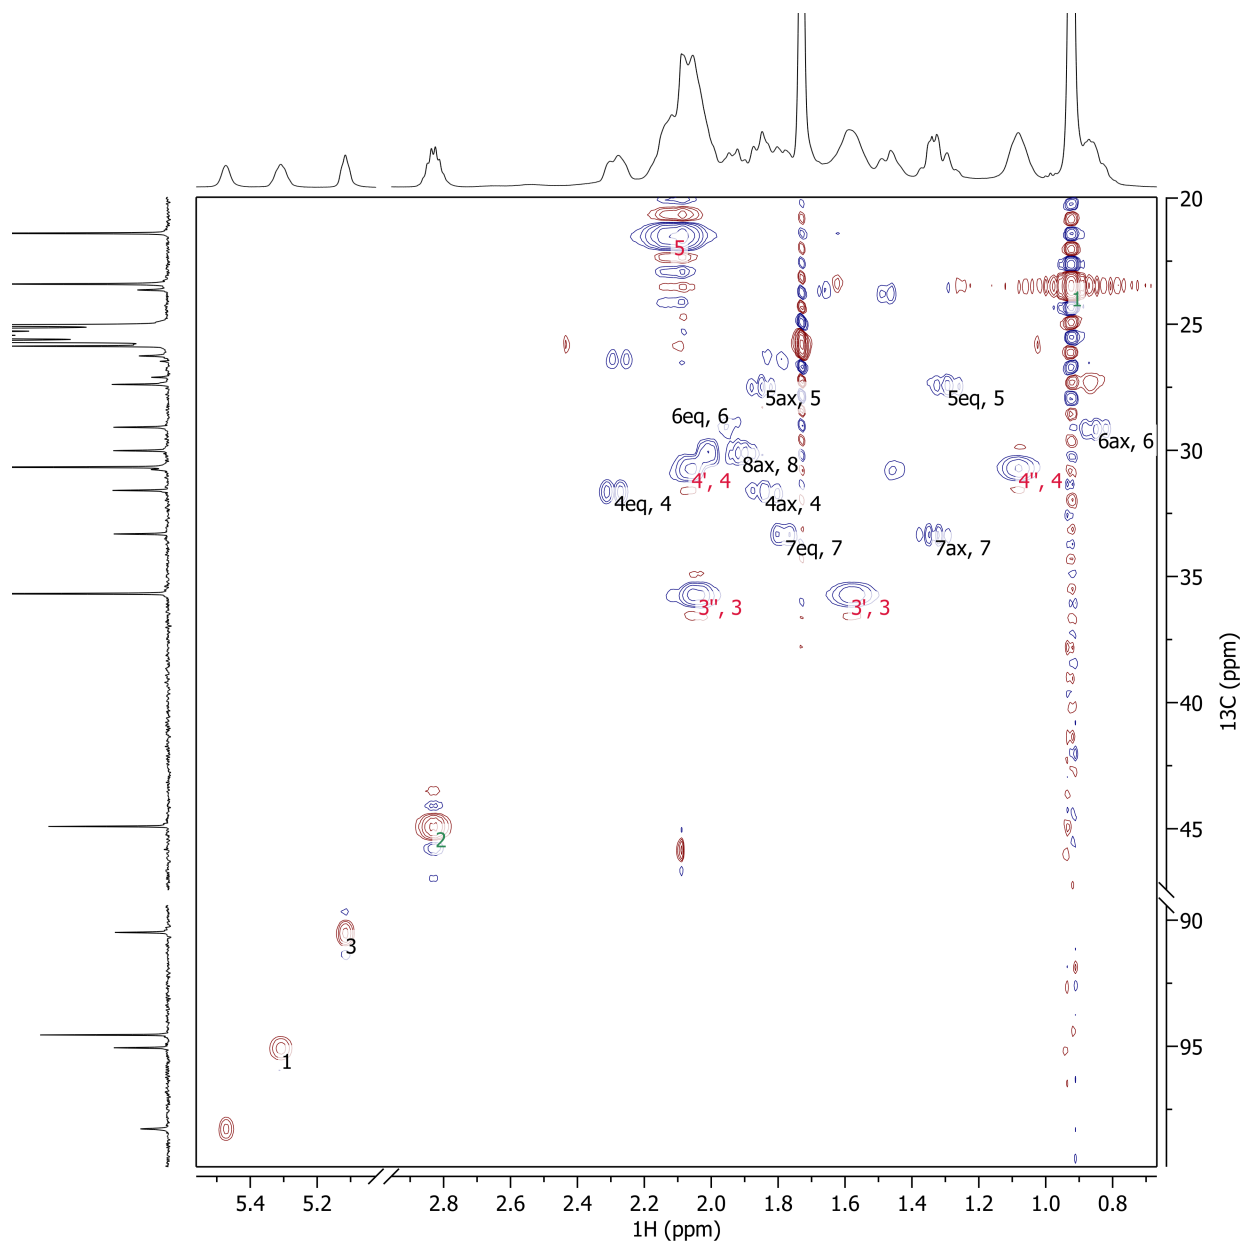

**Figure S-35.** Partial display of multiplicity-edited 2D  $^1\text{H}/^{13}\text{C}$  HSQC spectrum at  $-110\text{ }^\circ\text{C}$  in  $\text{THF-}d_8$ . Red and blue contours indicate positive and negative intensities corresponding to  $\text{CH}/\text{CH}_3$  and  $\text{CH}_2$  groups, respectively. Numbers indicate assignments of cycloocta-1,2-diene (**28**, black), cyclooctyne (**27**, red) and diisopropylamine (green). Unassigned correlations are attributed to a minor, symmetric conformational isomer of **28**.

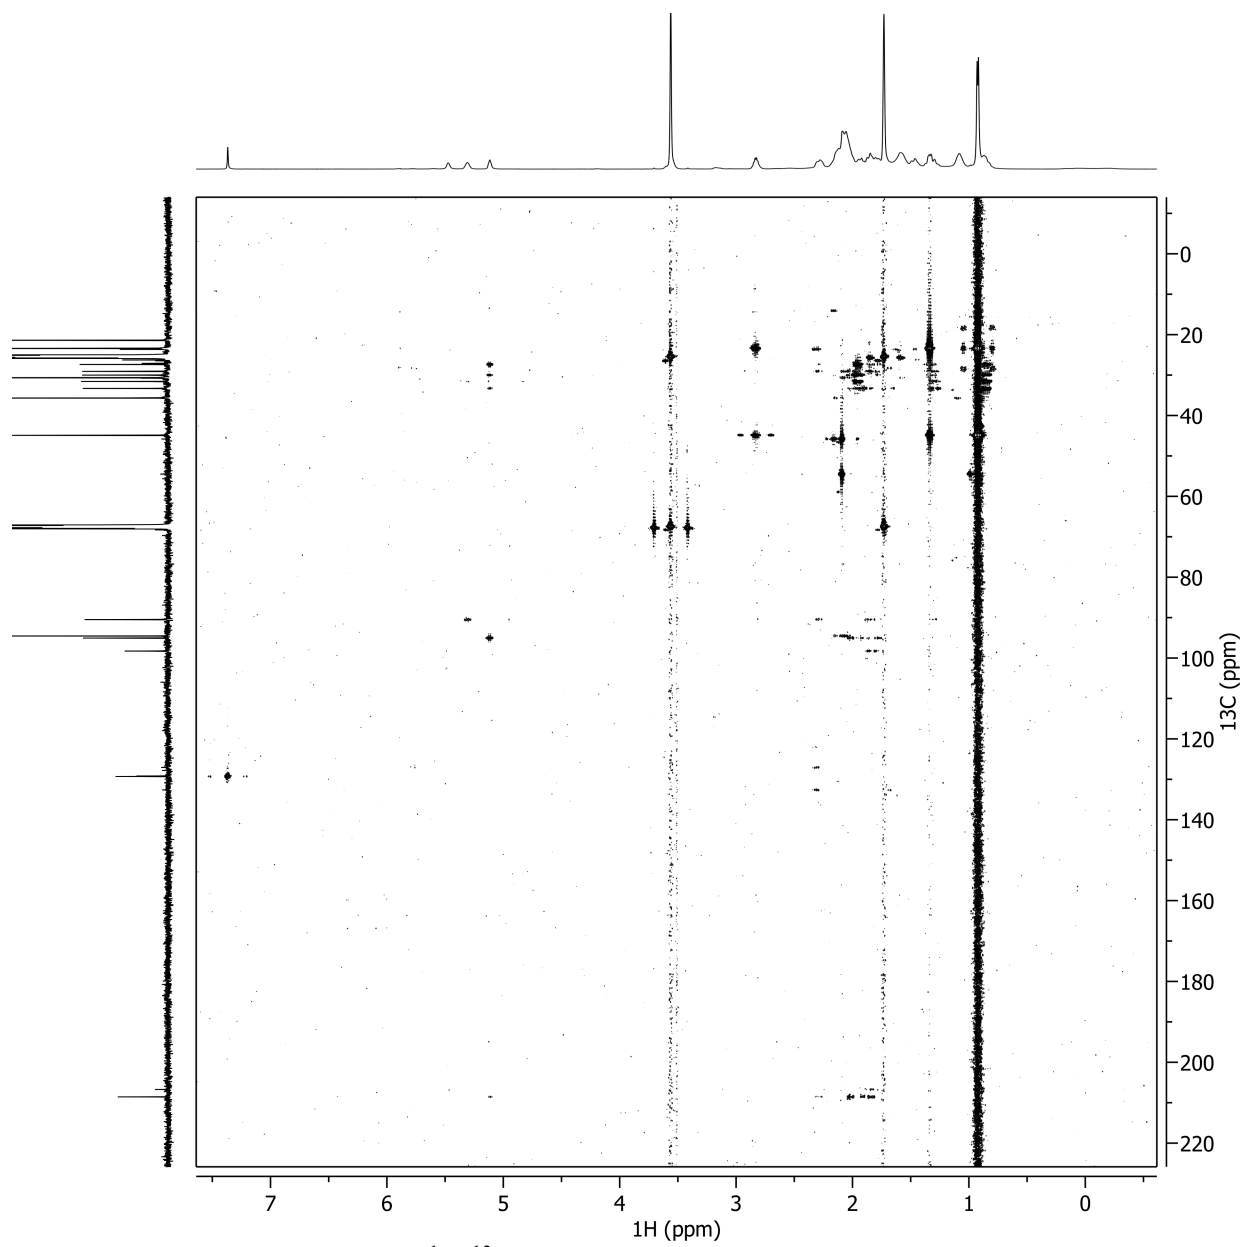

**Figure S-36.** Full display of 2D  $^1\text{H}/^{13}\text{C}$  HMBC spectrum at  $-110\text{ }^\circ\text{C}$  in  $\text{THF-}d_8$ .



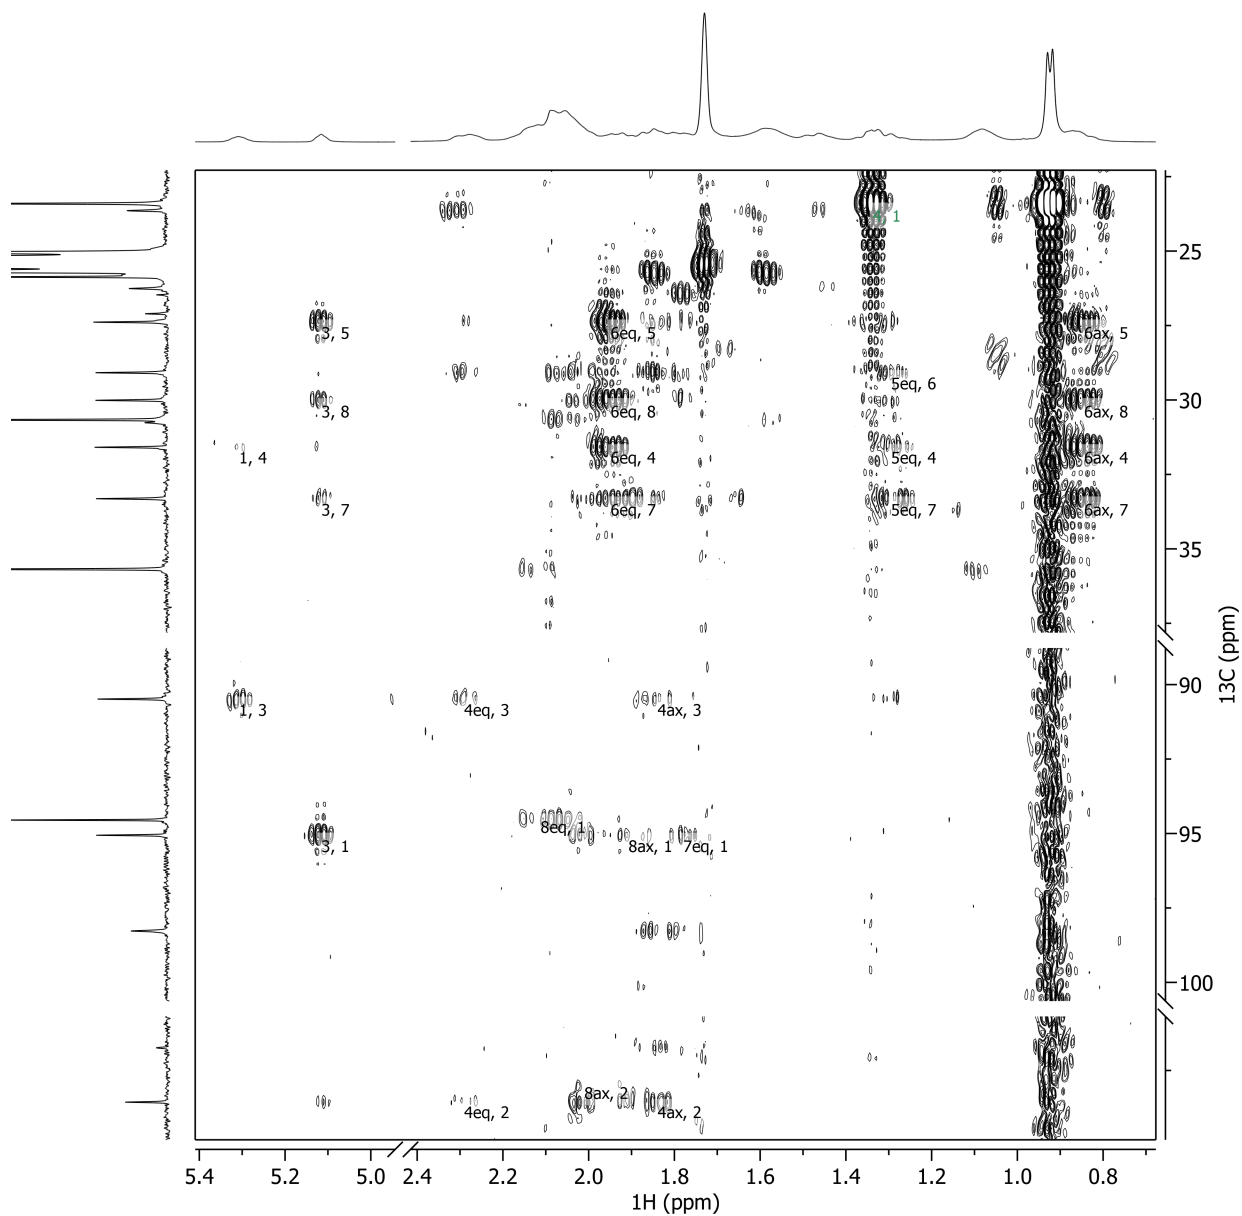

**Figure S-37.** Partial display of 2D  $^1\text{H}/^{13}\text{C}$  HMBC spectrum at  $-110\text{ }^\circ\text{C}$  in  $\text{THF-}d_8$ . Black numbers indicate crosspeak assignments for cycloocta-1,2-diene (**28**). Other assignments were omitted for clarity.

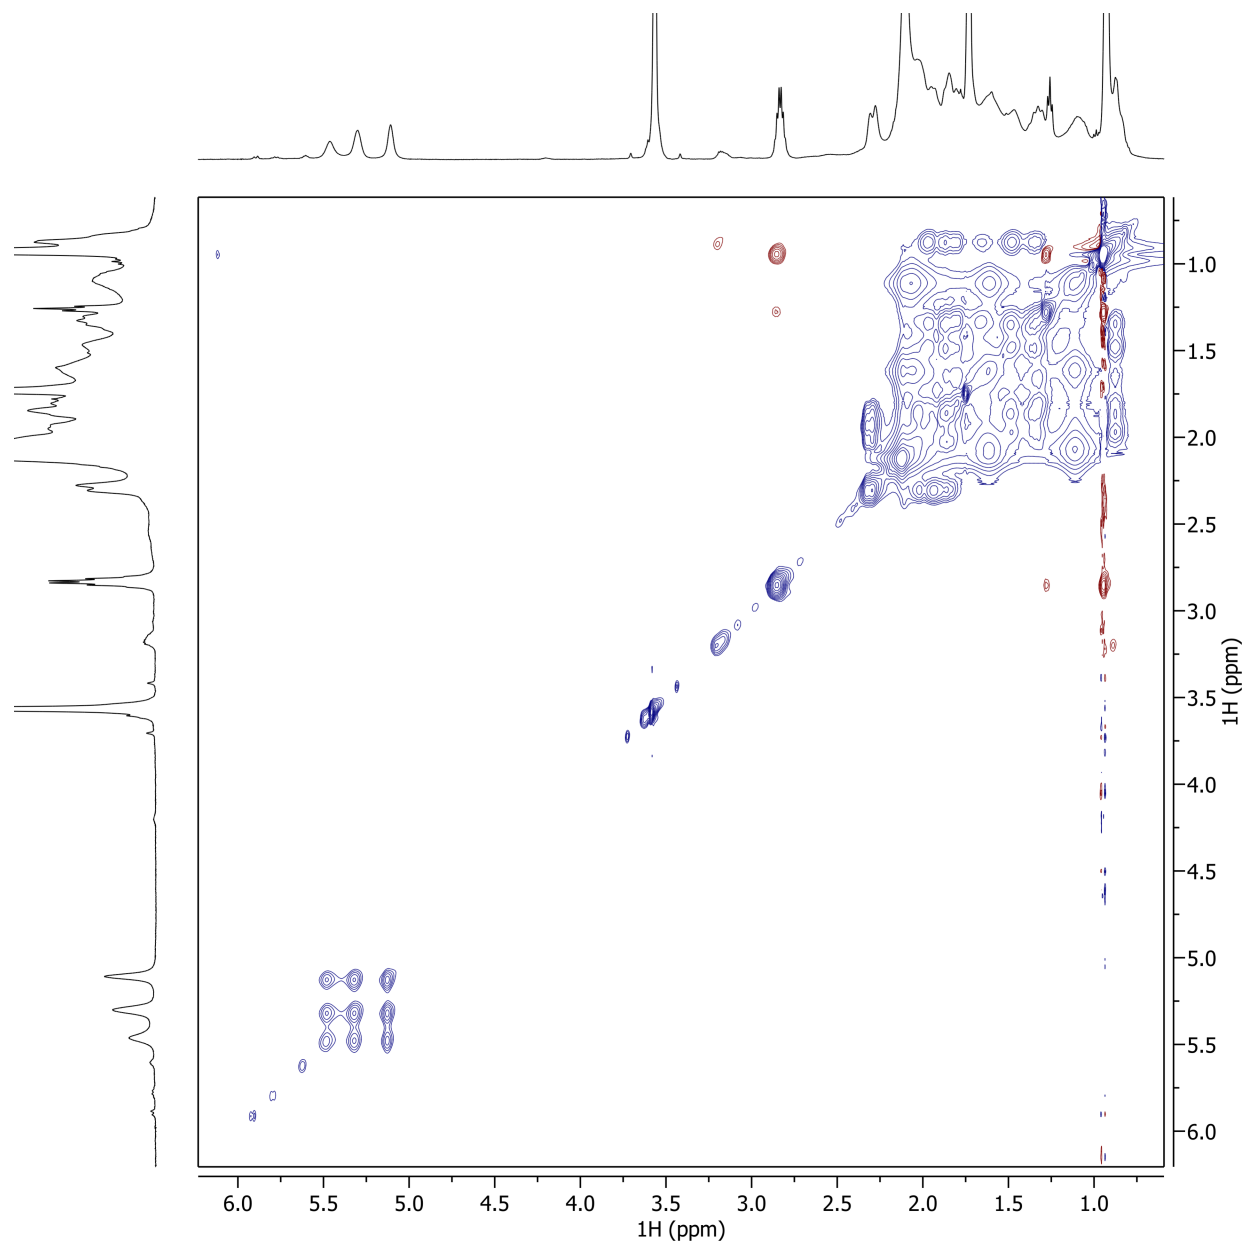

**Figure S-38.** Full display of 2D  $^1\text{H}$  ROESY spectrum at  $-110\text{ }^\circ\text{C}$  in  $\text{THF-}d_8$  showing extensive exchange between symmetric and asymmetric cycloocta-1,2-diene (**28**) isomers, as well as within the major isomer. Blue contours correspond to negative intensities.

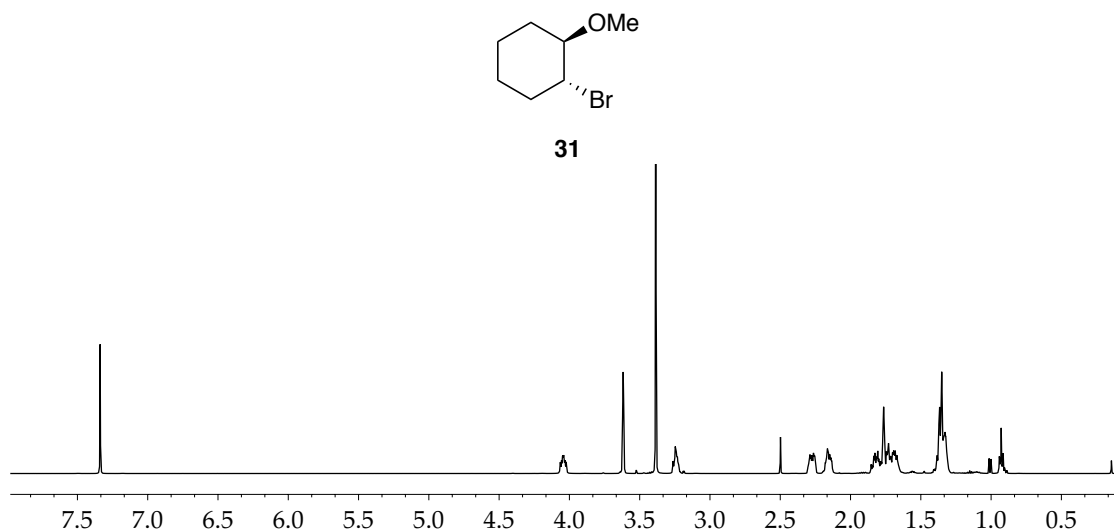

**Figure S-39.**  $^1\text{H}$  NMR (500 MHz,  $\text{THF-}d_8$ ) of *trans*-1-bromo-2-methoxycyclohexane (**31**):  $\delta$  4.05 (1H, m), 3.38 (3H, s), 3.24 (1H, m), 2.28 (1H, m), 2.15 (1H, m), 1.72 (3H, m), 1.35 (2H, m), xxincomplete

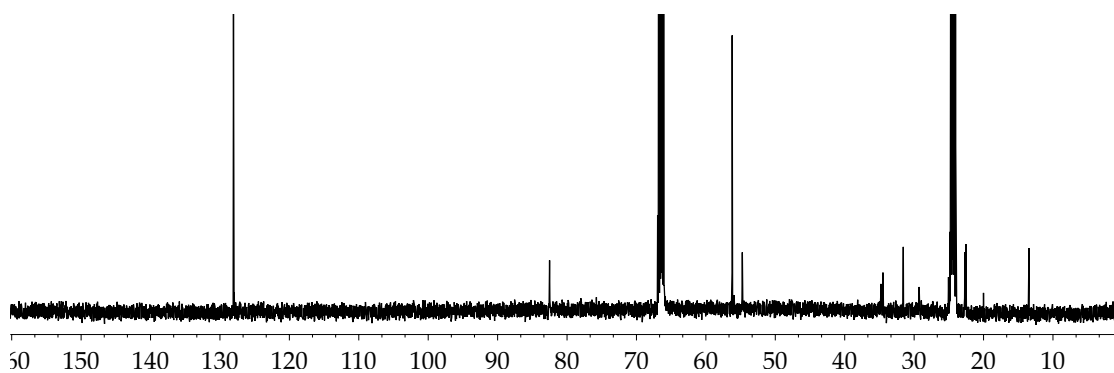

**Figure S-40.**  $^{13}\text{C}$  NMR (126 MHz,  $\text{THF-}d_8$ ) of *trans*-1-bromo-2-methoxycyclohexane (**31**):  $\delta$ .128.2, 82.3, 56.1, 54.7, 34.4, 31.5, 29.3.

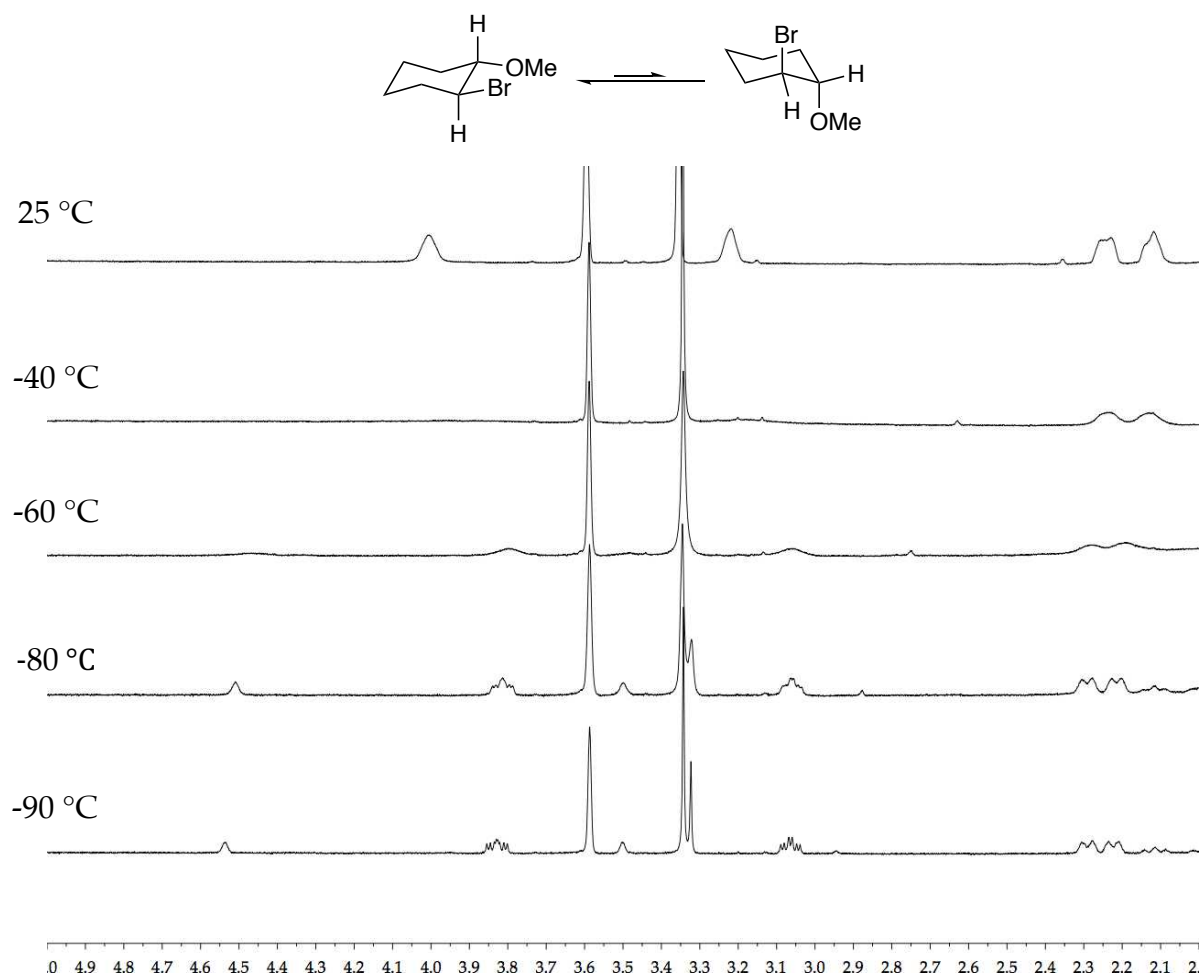

**Figure S-41.** <sup>1</sup>H NMR spectra of 1-bromo-2-methoxycyclohexane (**31**, 0.10 M) in 6.1 M THF/hexane, recorded at different temperatures.

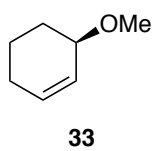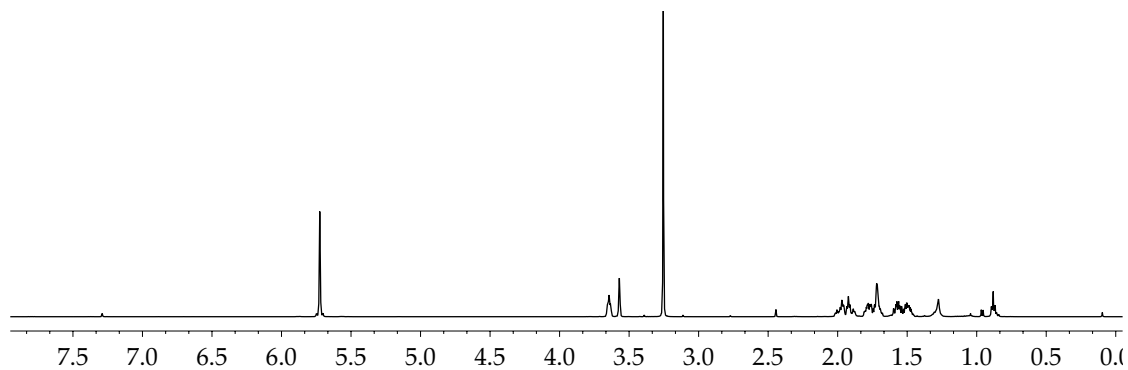

**Figure S-42.**  $^1\text{H}$  NMR (500 MHz,  $\text{THF-}d_8$ ) of 3-methoxycyclohex-1-ene (**33**):  $\delta$  5.78 (2H, m), 3.60 (1H, m), 3.25 (3H, s), 1.45–2.15 (4H, m), 0.75 (2H, m).

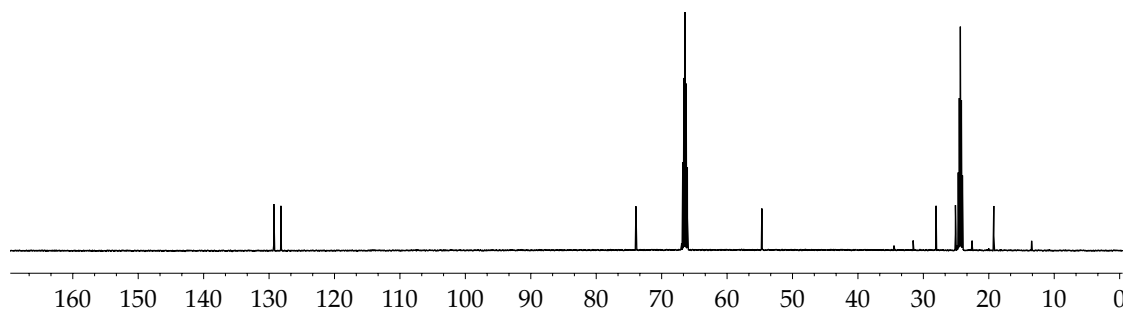

**Figure S-43.**  $^{13}\text{C}$  NMR (126 MHz,  $\text{THF-}d_8$ ) of 3-methoxycyclohex-1-ene (**33**):  $\delta$  129.8, 129.2, 74.6, 55.6, 35.2, 26.3, 19.8.

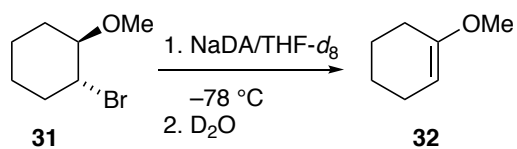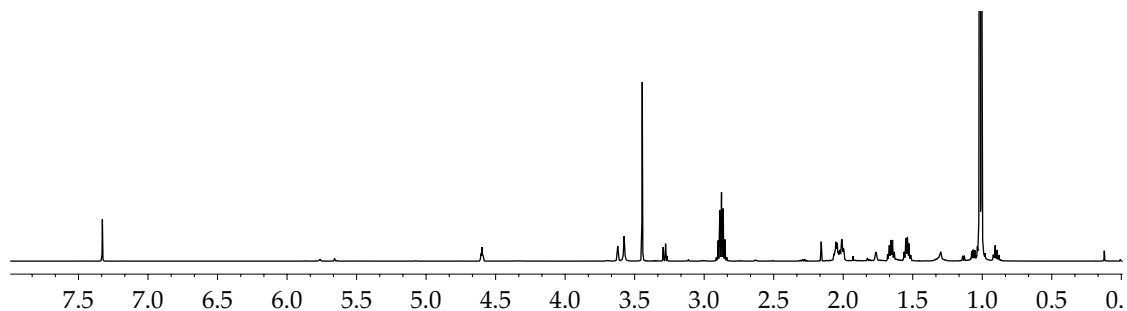

**Figure S-44.**  $^1\text{H}$  NMR (500 MHz,  $\text{THF-}d_8$ ) of 1-methoxycyclohex-1-ene (**32**):  $\delta$  4.58 (1H, m), 3.47 (3H, s), 2.15–1.85 (4H, m), 1.66–1.52 (4H, m).

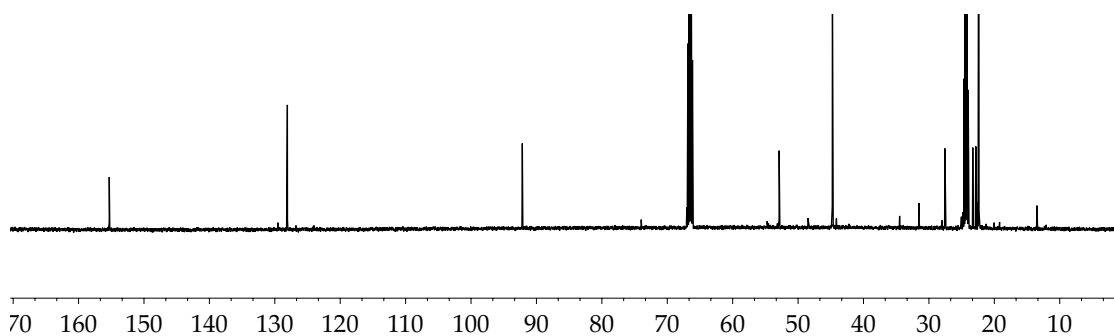

**Figure S-45.**  $^{13}\text{C}$  NMR (126 MHz,  $\text{THF-}d_8$ ) of 1-methoxycyclohex-1-ene (**32**):  $\delta$  155.0, 128.2, 53.1, 28.8, 23.4, 23.2, 23.0.

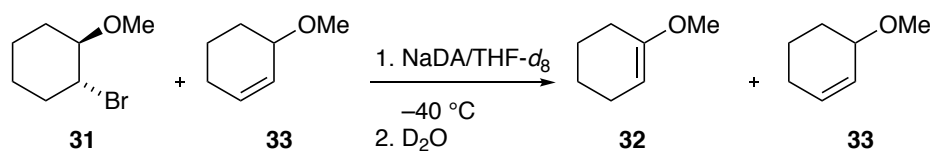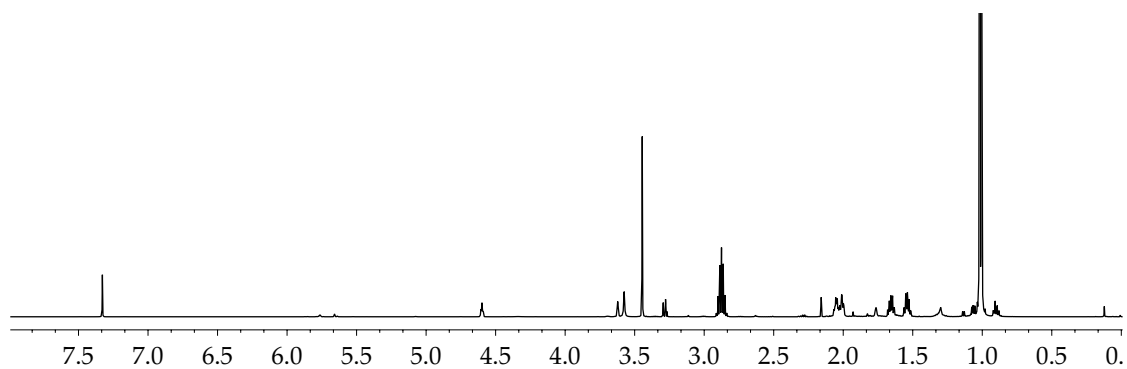

**Figure S-46.**  $^1\text{H}$  NMR (500 MHz,  $\text{THF-}d_8$ ) of 1-methoxycyclohex-1-ene (**32**) and 3-methoxycyclohex-1-ene (**33**).

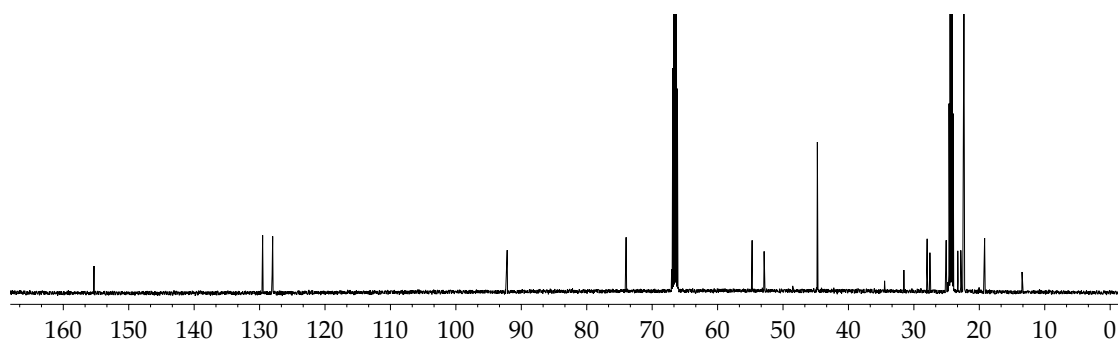

**Figure S-47.**  $^{13}\text{C}$  NMR (126 MHz,  $\text{THF-}d_8$ ) of 1-methoxycyclohex-1-ene (**32**) and 3-methoxycyclohex-1-ene (**33**).

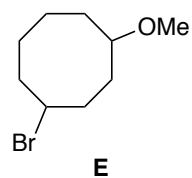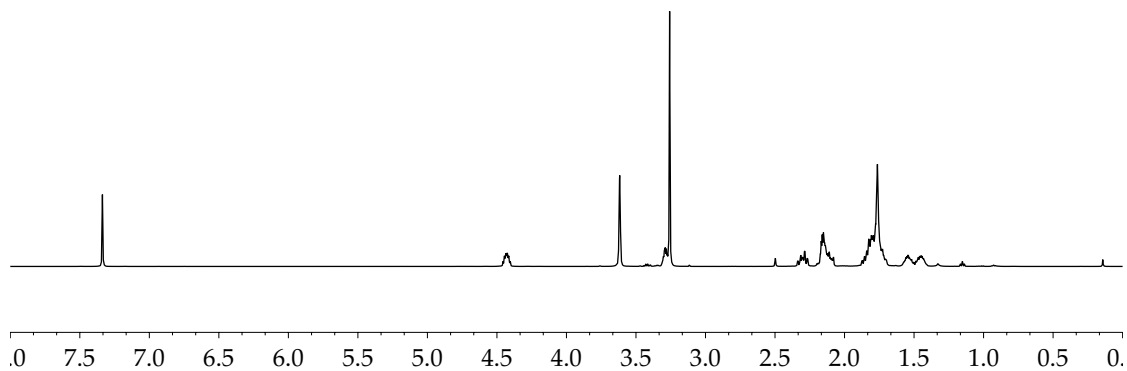

**Figure S-48.**  $^1\text{H}$  NMR (500 MHz,  $\text{THF-}d_8$ ) of 1-bromo-4-methoxycyclooctane (**E**):

$\delta$  4.45 (1H, m), 3.24 (1H, m), 3.19 (3H, s), 2.38-2.15 (6H, m), 1.86-1.50 (6H, m).

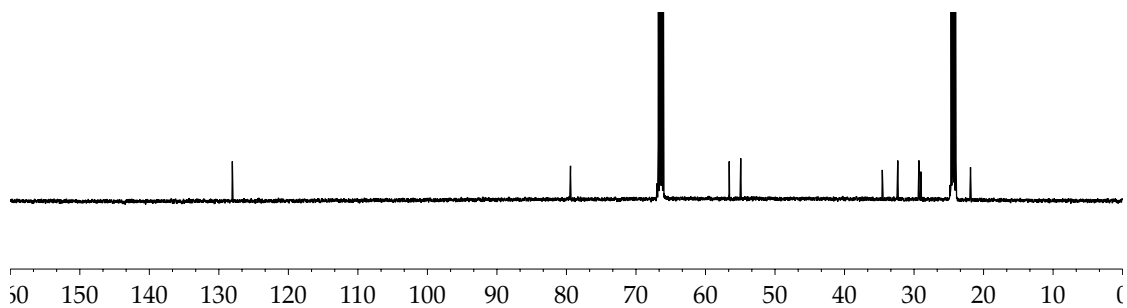

**Figure S-49.**  $^{13}\text{C}$  NMR (126 MHz,  $\text{THF-}d_8$ ) of 1-bromo-4-methoxycyclooctane (**E**):  $\delta$  128.2,

80.1, 56.6, 54.9, 35.0, 33.5, 28.3, 21.7.



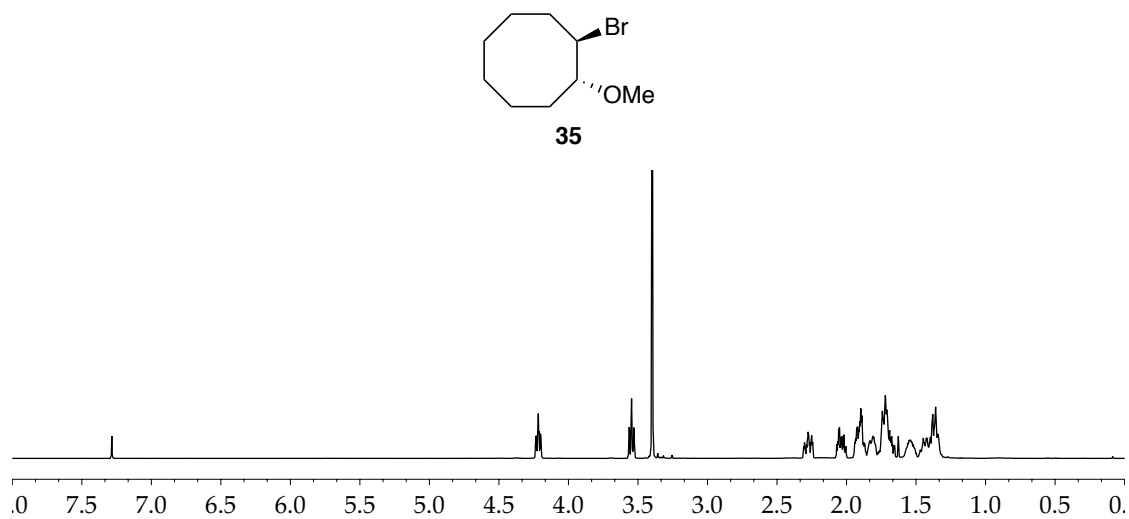

**Figure S-50.** <sup>1</sup>H NMR (500 MHz, CDCl<sub>3</sub>) of *trans*-1-bromo-2-methoxycyclooctane (**35**): δ 5.78 (1H, m), 3.08 (1H, m), 3.46 (3H, s), 2.34–1.24 (12H, m).

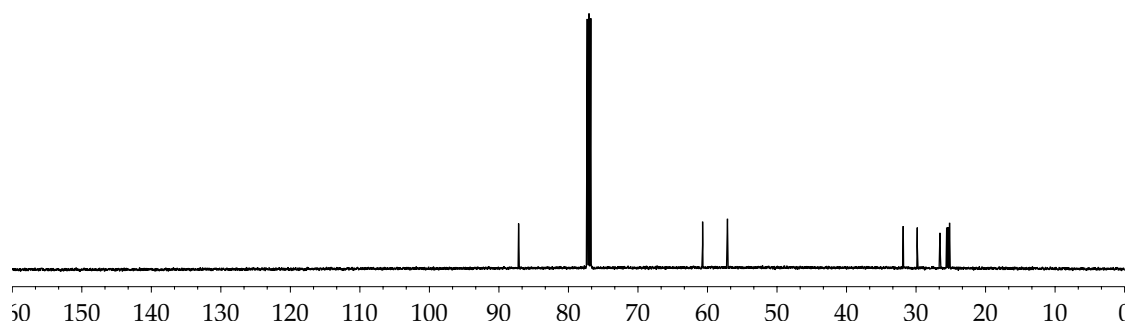

**Figure S-51.** <sup>13</sup>C NMR (126 MHz, CDCl<sub>3</sub>) of *trans*-1-bromo-2-methoxycyclooctane (**35**): δ 86.6, 61.6, 56.7, 31.5, 29.9, 26.7, 26.0, 25.3.

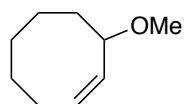

**36**

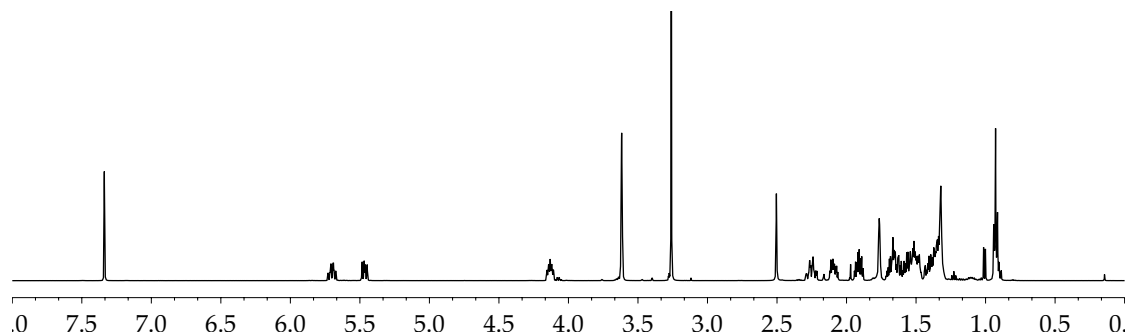

**Figure S-52.**  $^1\text{H}$  NMR (500 MHz,  $\text{THF-}d_8$ ) of (*Z*)-3-methoxycyclooct-1-ene (**36**):  $\delta$  5.65 (1H, m), 5.46 (1H, m), 4.08 (1H, m), 3.46 (3H, s), 2.45–1.2 (8H, m), 0.85 (2H, m)

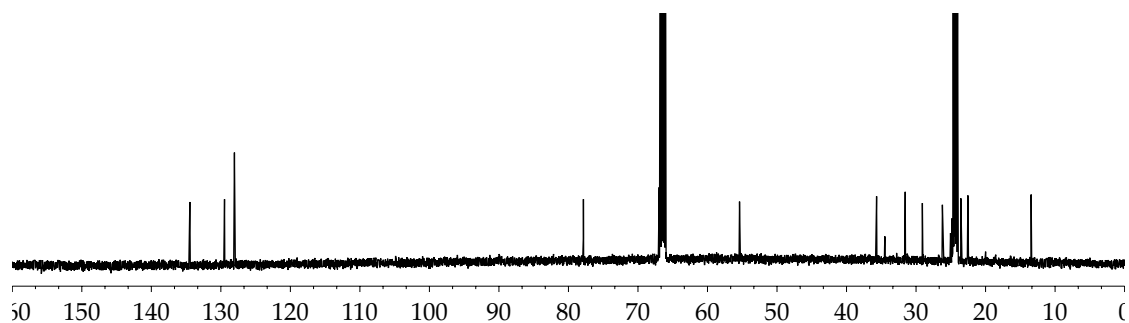

**Figure S-53.**  $^{13}\text{C}$  NMR (126 MHz,  $\text{THF-}d_8$ ) of (*Z*)-3-methoxycyclooct-1-ene (**36**):  $\delta$  134.8, 130.0, 126.8, 70.7, 55.1, 35.3, 31.8, 29.8, 26.7.

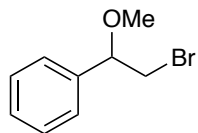

**37**

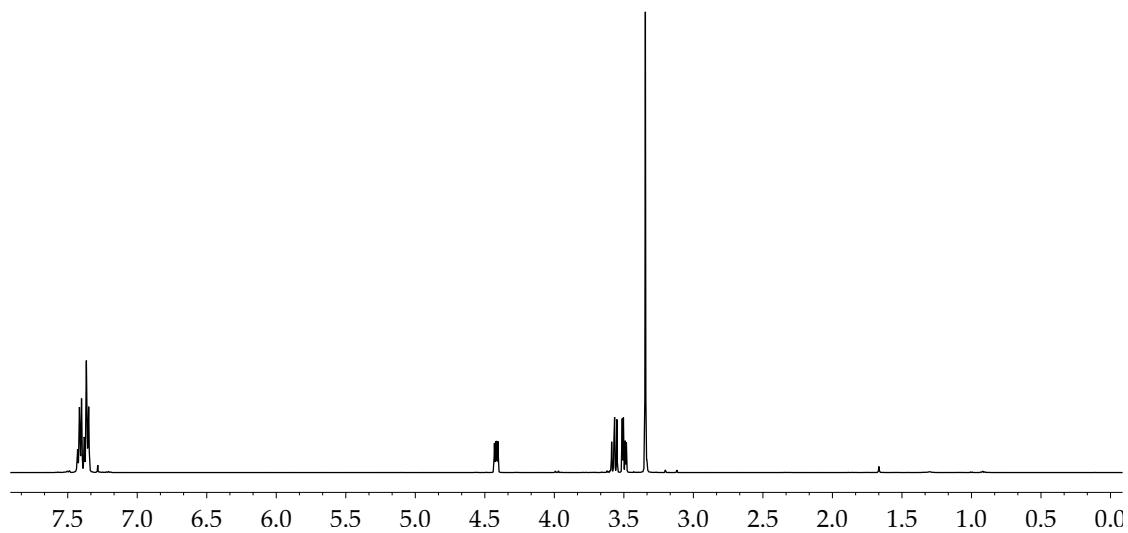

**Figure S-54.**  $^1\text{H}$  NMR (500 MHz,  $\text{CDCl}_3$ ) of (2-bromo-1-methoxyethyl)benzene (**37**):  $\delta$  7.47–7.33 (5H), 4.43 (1H, m), 3.09–3.45 (2H, m), 3.34 (3H, s).

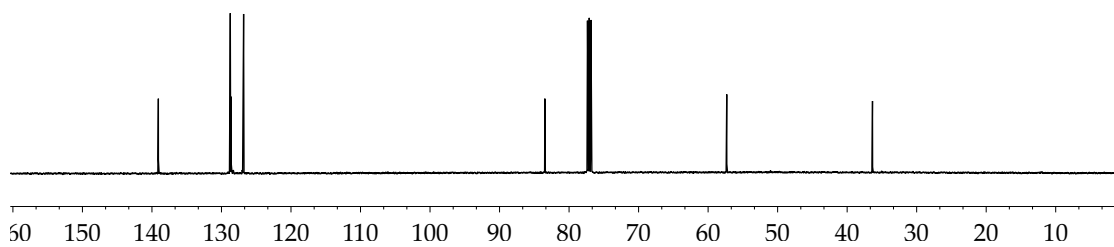

**Figure S-55.**  $^{13}\text{C}$  NMR (126 MHz,  $\text{CDCl}_3$ ) of (2-bromo-1-methoxyethyl)benzene (**37**):  $\delta$  139.8, 128.3, 126.6, 83.8, 57.1, 36.3.

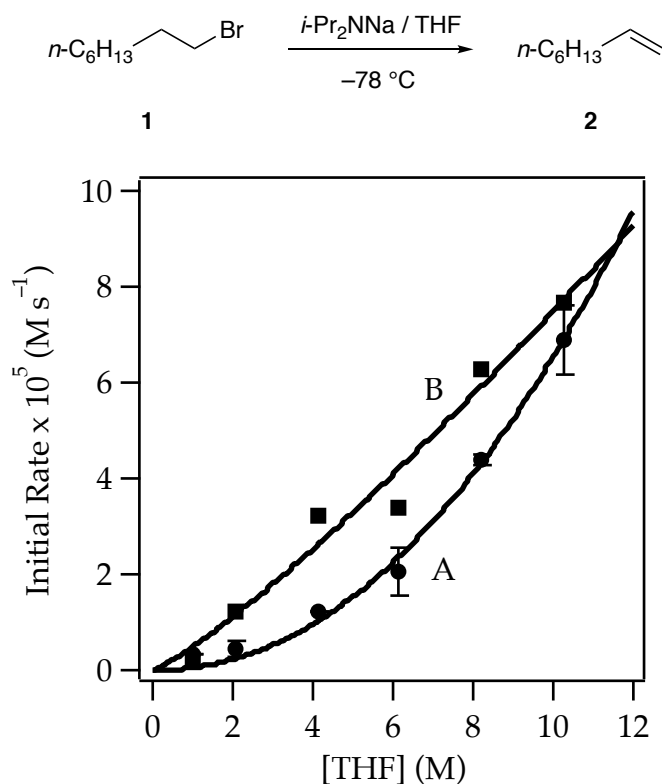

**Figure S-56.** Plot of initial rate versus [THF] for the dehydrobromination of 1-bromooctane (**1**) (0.050 M) with NaDA (0.10 M) at  $-78\text{ }^\circ\text{C}$  in hexane (Curve A) or 2,5-Me<sub>2</sub>THF (Curve B). The curves depict unweighted least-squares fits. Curve A:  $y = k[\text{THF}]^n$ ;  $k = (5.25 \pm 0.02) \times 10^{-5}$ ;  $n = 2.09 \pm 0.16$ . Curve B:  $y = k[\text{THF}]^n$ ;  $k = (0.93 \pm 0.03) \times 10^{-5}$ ;  $n = 1.18 \pm 0.17$ .

Curve A

| [THF] (M) | $y_1 \times 10^5 (\text{M s}^{-1})$ | $y_2 \times 10^5 (\text{M s}^{-1})$ | $y(\text{avg}) \times 10^5 (\text{M s}^{-1})$ |
|-----------|-------------------------------------|-------------------------------------|-----------------------------------------------|
| 1.03      | 0.32                                | -                                   | 0.32                                          |
| 2.05      | 0.58                                | 0.32                                | 0.45                                          |
| 4.1       | 1.20                                | -                                   | 1.20                                          |
| 6.15      | 1.71                                | 2.39                                | 2.05                                          |
| 8.20      | 4.34                                | 4.40                                | 4.37                                          |
| 10.25     | 6.39                                | 7.41                                | 6.90                                          |

Curve B

| [THF] (M) | $y_1 \times 10^5 (\text{Ms}^{-1})$ |
|-----------|------------------------------------|
| 1.03      | 0.25                               |
| 2.05      | 1.2                                |
| 4.1       | 3.2                                |
| 6.15      | 3.4                                |
| 8.20      | 6.3                                |
| 10.25     | 7.66                               |

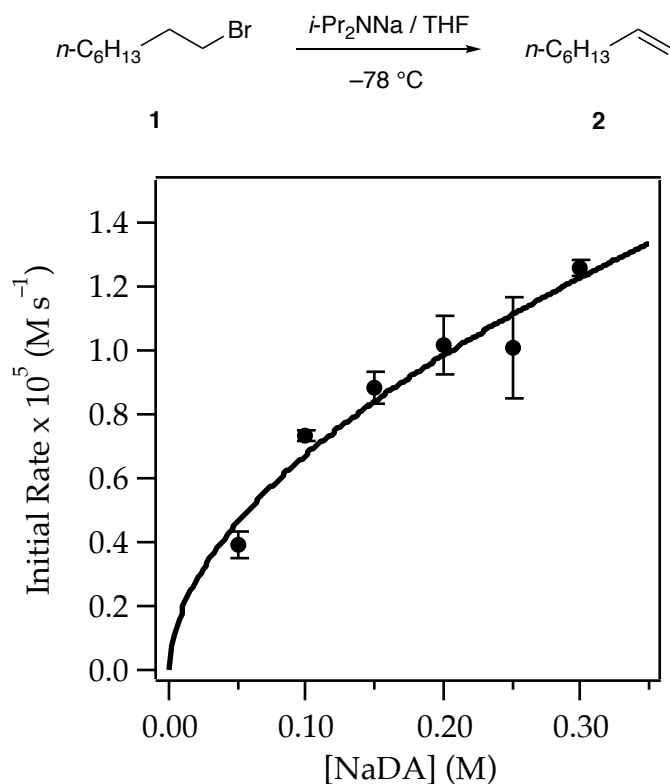

**Figure S-57.** Plot of initial rate versus [NaDA] in 5.10 M THF for the dehydrobromination of 1-bromooctane **1** (0.050 M) at  $-78\text{ }^\circ\text{C}$ . The curve depicts an unweighted least-squares fit to  $y = k[\text{NaDA}]^n$ :  $k = (23.7 \pm 3.0) \times 10^{-5}$ ;  $n = 0.55 \pm 0.07$ .

| [NaDA] (M) | $y_1 \times 10^5 (\text{Ms}^{-1})$ | $y_2 \times 10^5 (\text{Ms}^{-1})$ | $y(\text{avg}) \times 10^5 (\text{Ms}^{-1})$ |
|------------|------------------------------------|------------------------------------|----------------------------------------------|
| 0.05       | 3.6                                | 4.2                                | 3.9                                          |
| 0.1        | 7.2                                | 7.4                                | 7.3                                          |
| 0.15       | 9.2                                | 8.5                                | 8.85                                         |
| 0.2        | 9.5                                | 10.8                               | 10.15                                        |
| 0.25       | 9.0                                | 11.2                               | 10.0                                         |
| 0.3        | 12.4                               | 12.8                               | 12.6                                         |

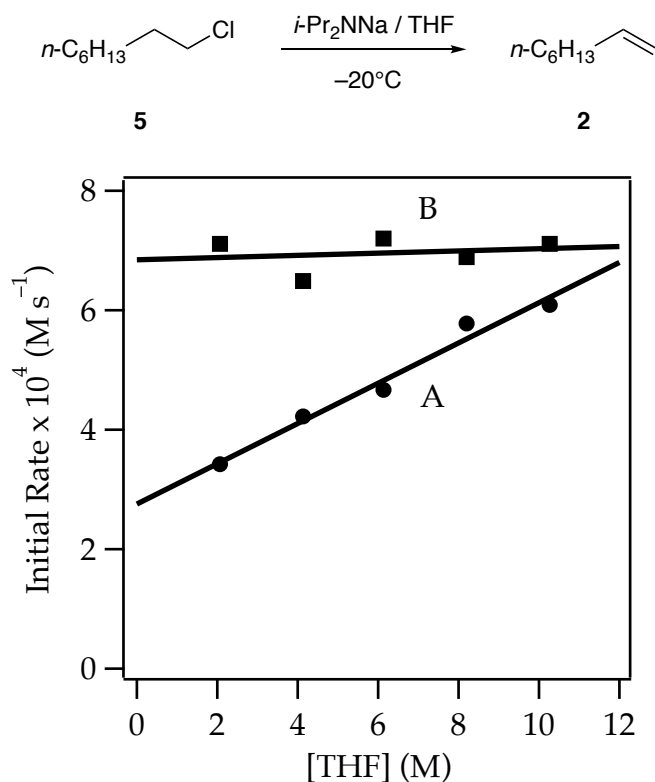

**Figure S-58.** Plot of initial rate versus [THF] for the dehydrochlorination of 1-chlorooctane **5** (0.050 M) with NaDA (0.10 M) at  $-20^\circ\text{C}$  in hexane (Curve A) or 2,5-Me<sub>2</sub>THF (curve B). The curves depict unweighted least-squares fit to  $y = k[\text{THF}] + k'$ . Curve A:  $k = (0.37 \pm 0.15) \times 10^{-4}$ ;  $k' = (2.25 \pm 0.29) \times 10^{-5}$ . Curve B:  $k = (0.02 \pm 0.05) \times 10^{-4}$ ;  $k' = (6.84 \pm 0.33) \times 10^{-5}$ .

Curve A

| [THF] (M) | $y_1 \times 10^4 (\text{M s}^{-1})$ |
|-----------|-------------------------------------|
| 2.05      | 3.43                                |
| 4.10      | 4.22                                |
| 6.15      | 4.67                                |
| 8.20      | 5.78                                |
| 10.25     | 6.10                                |

Curve B

[THF] (M)

$y_1 \times 10^4 (\text{Ms}^{-1})$

2.05

7.10

4.10

6.51

6.15

7.22

8.20

6.90

10.25

6.13



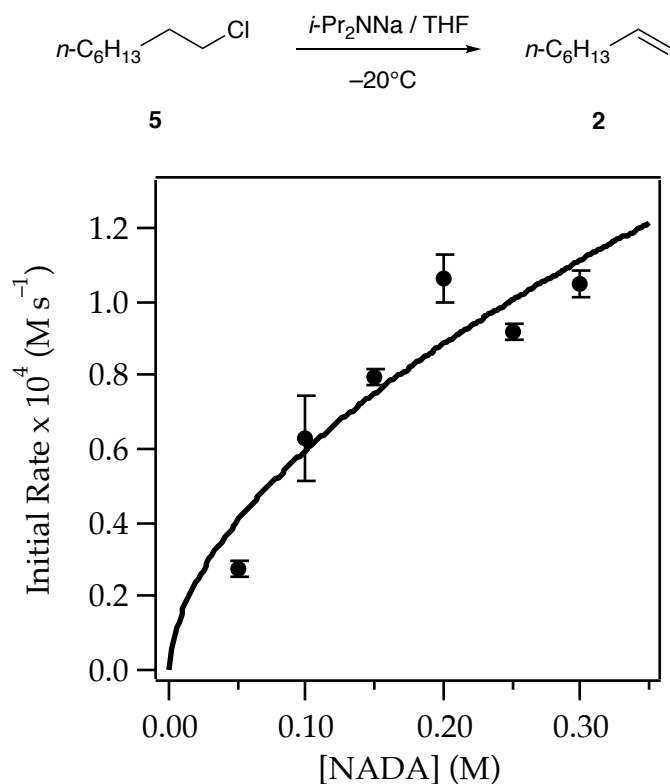

**Figure S-59.** Plot of initial rate versus [NaDA] in 5.10 M THF/hexane for the dehydrochlorination of 1-chlorooctane **5** (0.050 M) at  $-20^\circ\text{C}$ . The curve depicts an unweighted least-squares fit to  $y = k[\text{NaDA}]^n$ :  $k = (2.2 \pm 3.0) \times 10^{-4}$ ;  $n = 0.56 \pm 0.10$ .

| [NaDA] (M) | $y_1 \times 10^4 (\text{Ms}^{-1})$ | $y_2 \times 10^4 (\text{Ms}^{-1})$ | $y(\text{avg}) \times 10^4 (\text{Ms}^{-1})$ |
|------------|------------------------------------|------------------------------------|----------------------------------------------|
| 0.05       | 0.26                               | 0.29                               | 0.27                                         |
| 0.10       | 0.55                               | 0.71                               | 0.63                                         |
| 0.15       | 0.78                               | 0.81                               | 0.80                                         |
| 0.20       | 1.02                               | 1.11                               | 1.07                                         |
| 0.25       | 0.93                               | 0.90                               | 0.92                                         |
| 0.30       | 1.07                               | 1.02                               | 1.05                                         |

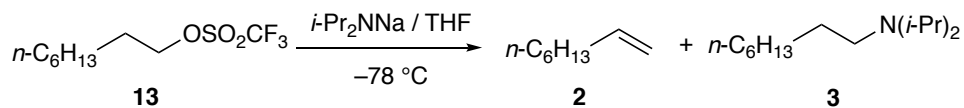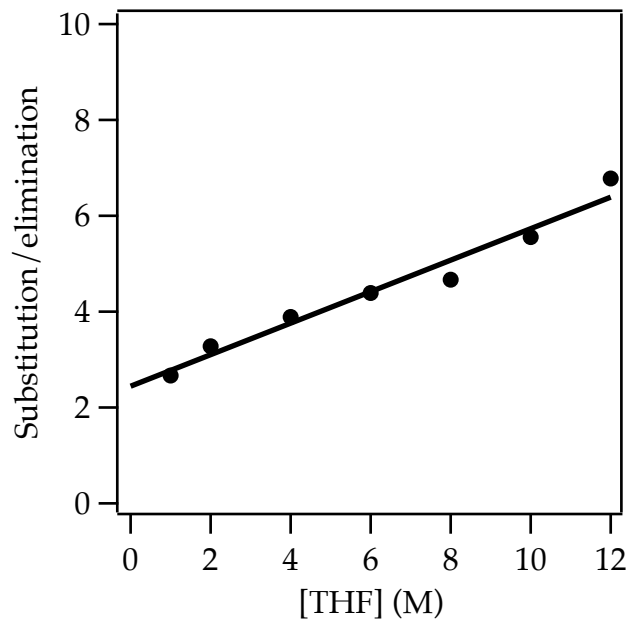

**Figure S-60.** Plot of  $[n\text{-C}_8\text{H}_{17}\text{N}(i\text{-Pr})_2]/[1\text{-octene}]$  versus THF concentration in hexane for the reaction of triflate **13** (0.10 M) with NaDA (0.12 M) at  $-78\text{ }^\circ\text{C}$ . The curve depicts an unweighted least-squares fit to  $y = k[\text{THF}] + k'$ :  $k = 0.33 \pm 0.03$ ;  $k' = 2.4 \pm 0.2$ .

| [THF] (M) | substitution/elimination |
|-----------|--------------------------|
| 1.0       | 2.7                      |
| 2.0       | 3.3                      |
| 4.0       | 3.9                      |
| 6.0       | 4.4                      |
| 8.0       | 4.7                      |
| 10.0      | 5.5                      |
| 12.0      | 6.7                      |

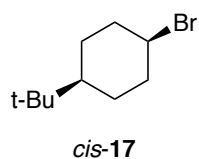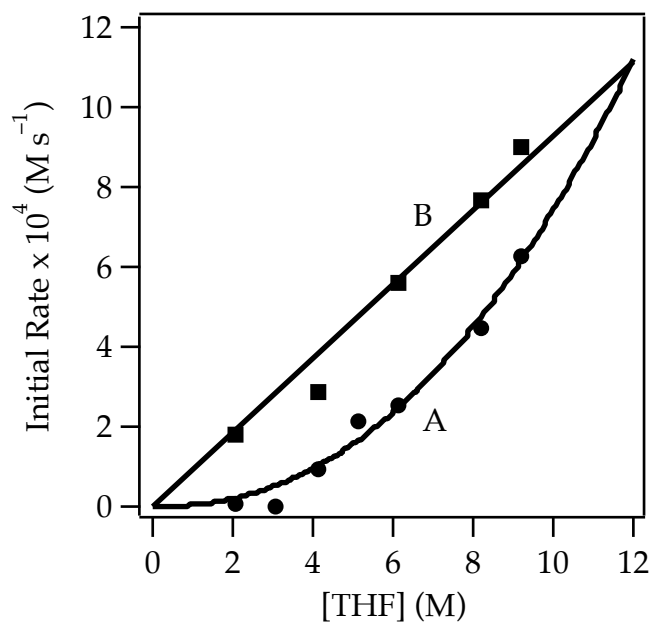

**Figure S-61.** Plot of initial rate versus [THF] for the dehydrobromination of *cis*-17 (0.050 M) with NaDA (0.10 M) at  $-50\text{ }^{\circ}\text{C}$  in hexane (curve A) or 2,5-Me<sub>2</sub>THF (curve B). The curves depict unweighted least-squares fits. Curve A:  $y = k[\text{THF}]^n$ ;  $k = (3.23 \pm 0.01) \times 10^{-6}$ ;  $n = 2.39 \pm 0.24$ . Curve B:  $y = k[\text{THF}]$ ;  $k = (0.93 \pm 0.03) \times 10^{-4}$ .

Curve A

| [THF] (M) | $y_1 \times 10^4 (\text{M s}^{-1})$ |
|-----------|-------------------------------------|
| 2.05      | 0.042                               |
| 3.08      | 0.032                               |
| 4.10      | 0.95                                |
| 6.15      | 1.25                                |
| 8.20      | 2.54                                |
| 9.23      | 6.30                                |

Curve B

[THF] (M)

$y_1 \times 10^4 (\text{Ms}^{-1})$

2.05

1.80

4.10

2.92

6.15

5.61

8.20

7.70

9.23

9.02

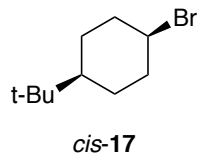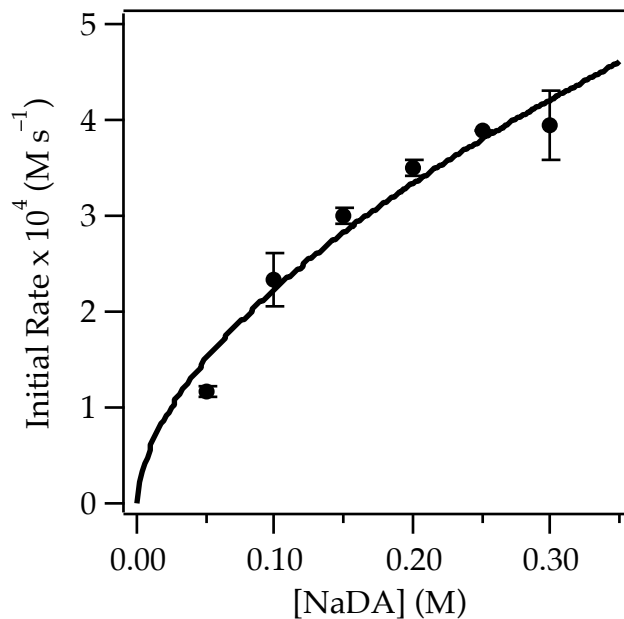

**Figure S-62.** Plot of initial rate versus [NaDA] in THF (5.10 M) for the dehydrobromination of *cis*-1-bromo-4-*tert*-butylcyclohexane *cis*-17 (0.050 M) at  $-50\text{ }^{\circ}\text{C}$ . The curve depicts an unweighted least-squares fit to  $y = k[\text{NaDA}]^n$ :  $k = (8.4 \pm 0.1) \times 10^{-4}$ ;  $n = 0.58 \pm 0.08$ .

| [NaDA] (M) | $y_1 \times 10^4 (\text{M s}^{-1})$ | $y_2 \times 10^4 (\text{M s}^{-1})$ | $y(\text{avg}) \times 10^4 (\text{M s}^{-1})$ |
|------------|-------------------------------------|-------------------------------------|-----------------------------------------------|
| 0.05       | 1.20                                | 1.14                                | 1.17                                          |
| 0.10       | 2.54                                | 2.14                                | 2.34                                          |
| 0.15       | 2.95                                | 3.05                                | 3.00                                          |
| 0.20       | 3.43                                | 3.56                                | 3.50                                          |
| 0.25       | 3.89                                | 3.90                                | 3.90                                          |
| 0.30       | 4.2                                 | 3.68                                | 3.94                                          |

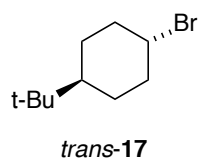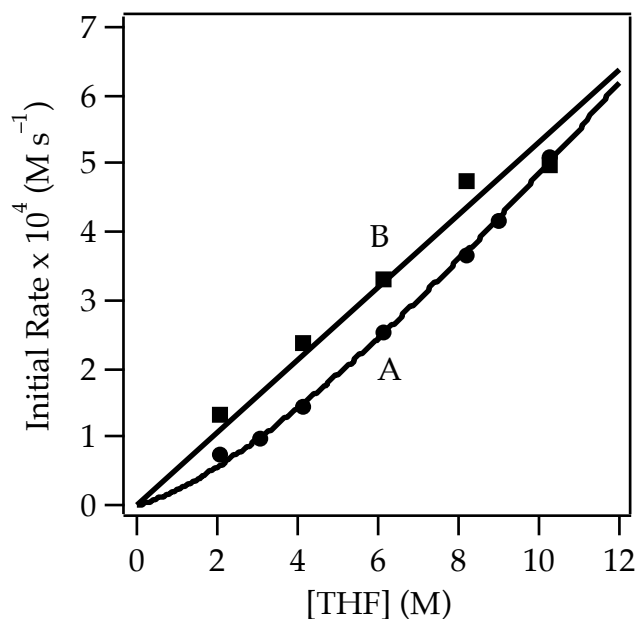

**Figure S-63.** Plot of initial rate versus [THF] for the dehydrobromination of *trans*-1-bromo-4-(*tert*-butyl)cyclohexane *trans*-17 (0.050 M) with NaDA (0.13 M) at  $-25\text{ }^{\circ}\text{C}$  in hexane (A) or 2,5-Me<sub>2</sub>THF (B). The curves depict unweighted least-squares fits. Hexane:  $y = k[\text{THF}]^n$ ;  $k = (1.11 \pm 0.2) \times 10^{-4}$ ;  $n = 1.34 \pm 0.04$ . Me<sub>2</sub>THF:  $y = k[\text{THF}]$ ;  $k = (0.53 \pm 0.02) \times 10^{-4}$ .

Curve A

| [THF] (M) | $y_1 \times 10^4 (\text{M s}^{-1})$ |
|-----------|-------------------------------------|
| 2.05      | 0.75                                |
| 3.08      | 0.98                                |
| 4.10      | 1.44                                |
| 6.15      | 2.51                                |
| 8.20      | 3.66                                |
| 9.00      | 4.16                                |
| 10.25     | 5.10                                |

Curve B

[THF] (M)       $y_1 \times 10^4 (\text{Ms}^{-1})$

2.05              1.33

4.10              2.37

6.15              3.30

8.20              4.76

10.25             4.97

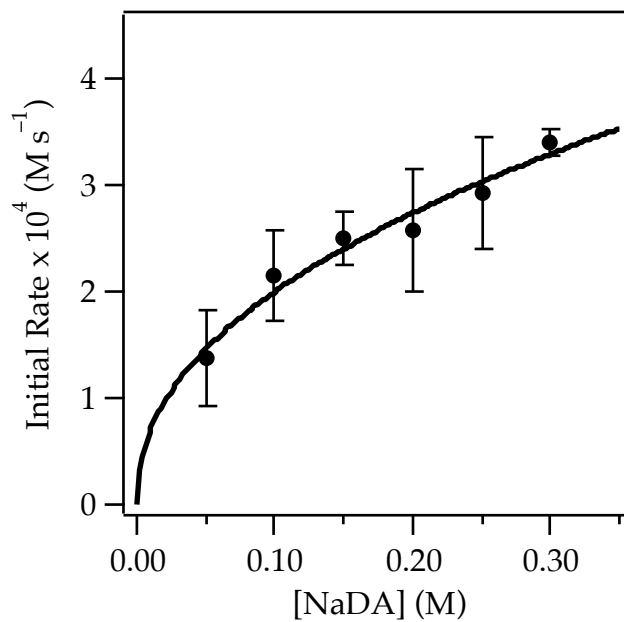

**Figure S-64.** Plot of initial rate versus [NaDA] in THF/hexane (5.10 M) for the dehydrobromination of *trans*-1-bromo-4-*tert*-butylcyclohexane *trans-17* (0.050 M) at  $-25\text{ }^{\circ}\text{C}$ . The curve depicts an unweighted least-squares fit to  $y = k[\text{NaDA}]^n$ :  $k = (5.7 \pm 0.5) \times 10^{-4}$ ;  $n = 0.46 \pm 0.05$ .

| [NaDA] (M) | $y_1 \times 10^4 (\text{M s}^{-1})$ | $y_2 \times 10^4 (\text{M s}^{-1})$ | $y(\text{avg}) \times 10^4 (\text{M s}^{-1})$ |
|------------|-------------------------------------|-------------------------------------|-----------------------------------------------|
| 0.025      | 0.50                                | —                                   | 0.50                                          |
| 0.050      | 1.06                                | 1.68                                | 1.37                                          |
| 0.10       | 1.85                                | 2.45                                | 2.15                                          |
| 0.15       | 2.32                                | 2.66                                | 2.49                                          |
| 0.20       | 2.32                                | 2.99                                | 2.58                                          |
| 0.25       | 2.55                                | 3.29                                | 2.92                                          |
| 0.30       | 3.32                                | 3.50                                | 3.41                                          |



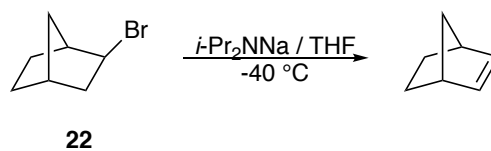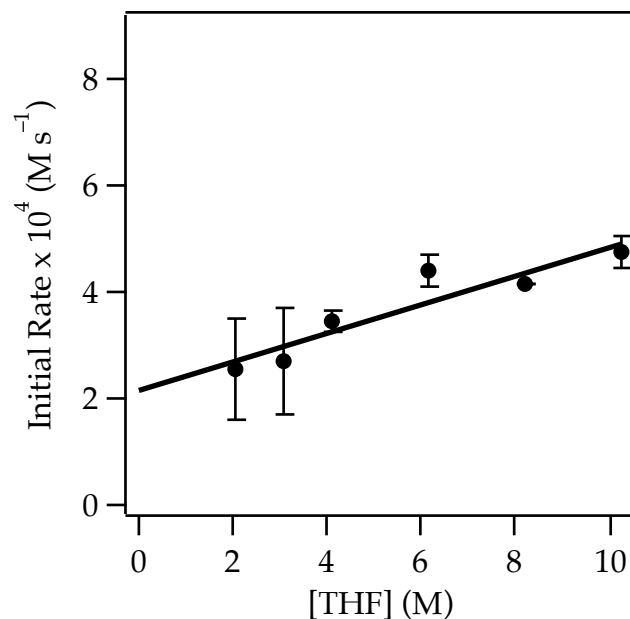

**Figure S-65.** Plot of initial rate versus [THF] in hexane for the dehydrobromination of *exo*-2-bromonorbornane **22** (0.040 M) with NaDA (0.10 M) at  $-40\text{ }^{\circ}\text{C}$ . The curve depicts an unweighted least-squares fit to  $y = k[\text{THF}] + k'$ :  $k = (2.6 \pm 0.5) \times 10^{-4}$ ;  $k' = (2.2 \pm 0.3) \times 10^{-4}$ .

| [THF] (M) | $y_1 \times 10^4 (\text{Ms}^{-1})$ | $y_2 \times 10^4 (\text{Ms}^{-1})$ | $y(\text{avg}) \times 10^4 (\text{Ms}^{-1})$ |
|-----------|------------------------------------|------------------------------------|----------------------------------------------|
| 2.05      | 3.23                               | 1.89                               | 2.56                                         |
| 3.08      | 2.10                               | 3.40                               | 2.75                                         |
| 4.10      | 3.60                               | 3.33                               | 3.47                                         |
| 6.15      | 4.19                               | 4.60                               | 4.40                                         |
| 8.20      | 4.14                               | 4.12                               | 4.13                                         |
| 10.25     | 4.96                               | 4.55                               | 4.76                                         |

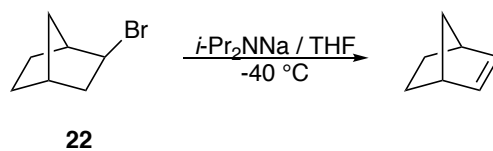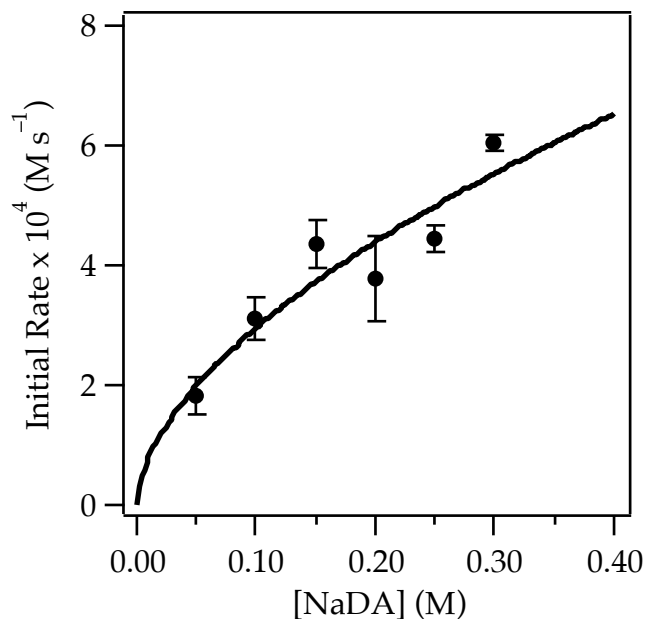

**Figure S-66.** Plot of initial rate versus [NaDA] in THF/hexane (5.10 M) for the dehydrobromination of *exo*-2-bromonorbornane **22** (0.040 M) at  $-40\text{ }^\circ\text{C}$ . The curve depicts an unweighted least-squares fit to  $y = k[\text{NaDA}]^n$ :  $k = (11.0 \pm 2.5) \times 10^{-4}$ ;  $n = 0.57 \pm 0.10$ .

| [NaDA] (M) | $y_1 \times 10^4 (\text{Ms}^{-1})$ | $y_2 \times 10^4 (\text{Ms}^{-1})$ | $y(\text{avg}) \times 10^4 (\text{Ms}^{-1})$ |
|------------|------------------------------------|------------------------------------|----------------------------------------------|
| 0.05       | 2.05                               | 1.60                               | 1.83                                         |
| 0.10       | 3.36                               | 2.85                               | 3.10                                         |
| 0.15       | 4.10                               | 4.65                               | 4.38                                         |
| 0.20       | 4.28                               | 3.25                               | 3.77                                         |
| 0.25       | 4.29                               | 4.62                               | 4.45                                         |
| 0.30       | 6.13                               | 5.96                               | 6.05                                         |

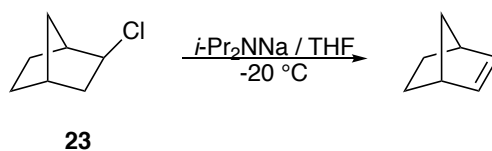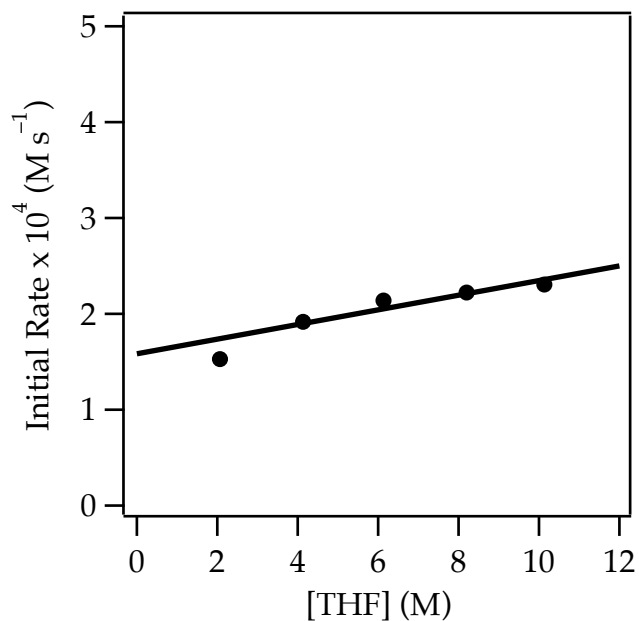

**Figure S-67.** Plot of initial rate versus [THF] in hexane for the dehydrochlorination of *exo*-2-chloronorbornane **23** (0.040 M) with NaDA at  $-20\text{ }^{\circ}\text{C}$ . The curve depicts an unweighted least-squares fit to  $y = k[\text{THF}] + k'$ :  $k = (1.45 \pm 0.10) \times 10^{-4}$ ;  $k' = (9.24 \pm 0.19) \times 10^{-4}$ .

| [THF] (M) | $y_1 \times 10^4 (\text{M s}^{-1})$ |
|-----------|-------------------------------------|
|-----------|-------------------------------------|

|      |      |
|------|------|
| 2.05 | 1.53 |
|------|------|

|      |      |
|------|------|
| 4.10 | 1.91 |
|------|------|

|      |      |
|------|------|
| 6.15 | 2.15 |
|------|------|

|      |      |
|------|------|
| 8.20 | 2.22 |
|------|------|

|       |      |
|-------|------|
| 10.25 | 2.31 |
|-------|------|

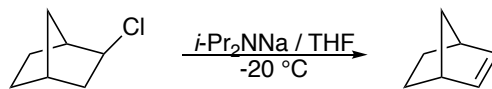

**23**

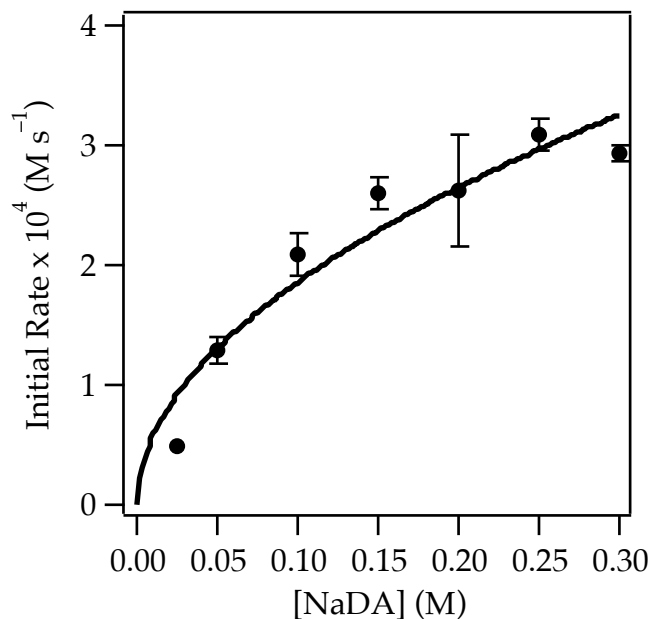

**Figure S-68.** Plot of initial rate versus [NaDA] in THF/hexane (5.10 M) for the dehydrochlorination of *exo*-2-chloronorbornane **23** (0.040 M) at  $-20\text{ }^\circ\text{C}$ . The curve depicts an unweighted least-squares fit to  $y = k[\text{NaDA}]^n$ :  $k = (6.01 \pm 0.9) \times 10^{-4}$ ;  $n = 0.51 \pm 0.09$ .

| [NaDA] (M) | $y_1 \times 10^4 (\text{M s}^{-1})$ | $y_2 \times 10^4 (\text{M s}^{-1})$ | $y(\text{avg}) \times 10^4 (\text{s}^{-1})$ |
|------------|-------------------------------------|-------------------------------------|---------------------------------------------|
| 0.025      | 0.50                                | —                                   | 0.50                                        |
| 0.05       | 1.20                                | 1.36                                | 1.28                                        |
| 0.10       | 2.21                                | 1.95                                | 2.08                                        |
| 0.15       | 2.70                                | 2.52                                | 2.61                                        |
| 0.20       | 2.95                                | 2.30                                | 2.63                                        |
| 0.25       | 3.18                                | 3.01                                | 3.09                                        |
| 0.30       | 2.89                                | 2.98                                | 2.94                                        |

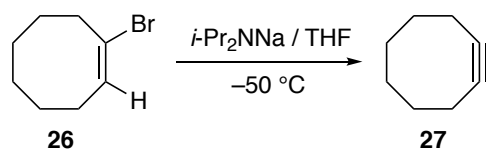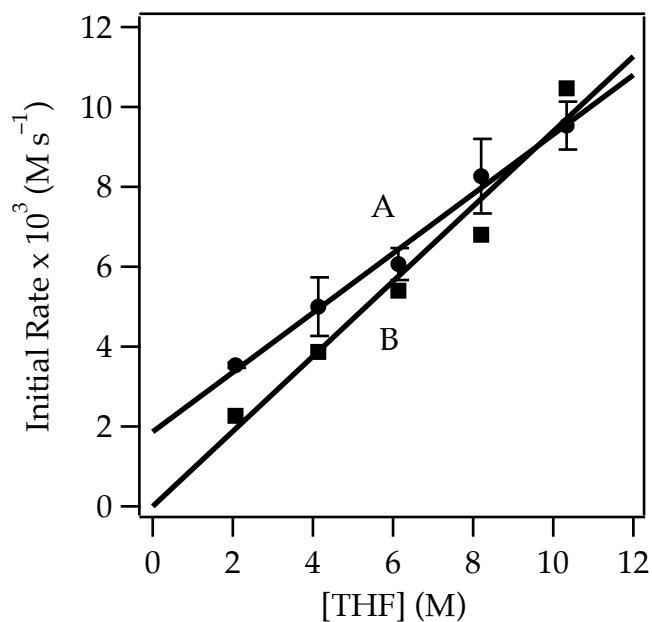

**Figure S-69.** Plot of initial rate versus [THF] for the dehydrobromination of 1-bromocyclooctene **26** (0.050 M) with NaDA (0.10 M) at  $-50\text{ }^\circ\text{C}$  in (A) hexane and (B) 2,5-Me<sub>2</sub>THF. The curve depicts an unweighted least-squares fit. Curve A:  $y = k[\text{THF}] + k'$ :  $k = (0.74 \pm 0.05) \times 10^{-3}$ ;  $k' = (1.90 \pm 0.05) \times 10^{-3}$ . Curve B:  $y = k[\text{THF}]$ :  $k = (0.89 \pm 0.12) \times 10^{-3}$ ;  $k' = (2.61 \pm 0.03) \times 10^{-5}$ .

| [THF] (M) | $y_1 \times 10^4 (\text{Ms}^{-1})$ | $y_2 \times 10^4 (\text{Ms}^{-1})$ | $y(\text{avg}) \times 10^4 (\text{Ms}^{-1})$ |
|-----------|------------------------------------|------------------------------------|----------------------------------------------|
| 2.05      | 3.47                               | 3.55                               | 3.51                                         |
| 4.10      | 5.55                               | 4.48                               | 5.02                                         |
| 6.15      | 5.80                               | 6.35                               | 6.08                                         |
| 8.20      | 7.59                               | 8.92                               | 8.26                                         |
| 10.25     | 9.97                               | 9.13                               | 9.55                                         |

Curve B

[THF] (M)

$y_1 \times 10^4 (\text{Ms}^{-1})$

2.05

2.32

4.10

3.90

6.15

5.42

8.20

6.30

10.25

9.91

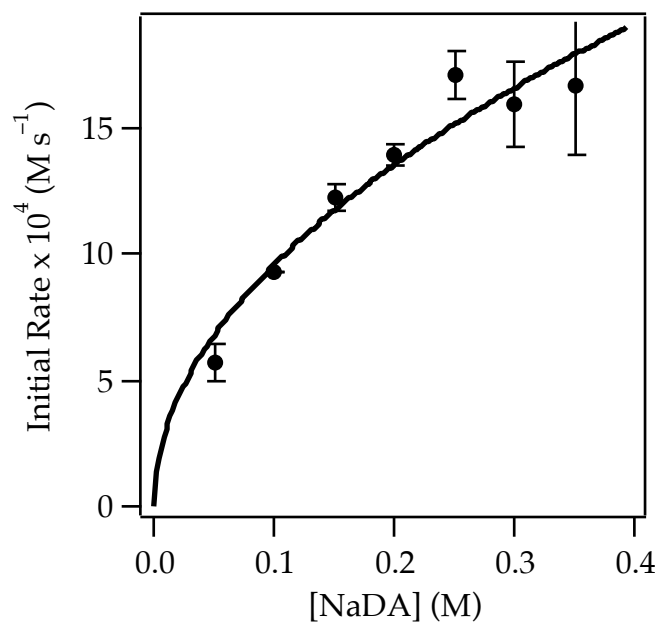

**Figure S-70.** Plot of initial rate versus [NaDA] in THF/hexane (5.10 M) for the dehydrobromination of 1-bromocyclooctene **26** (0.005 M) at  $-50\text{ }^\circ\text{C}$ . The curve depicts an unweighted least-squares fit to  $y = k[\text{NaDA}]^n$ :  $k = (30.7 \pm 3.3) \times 10^{-4}$ ;  $n = 0.50 \pm 0.07$ .

| [NaDA] (M) | $y_1 \times 10^4 (\text{Ms}^{-1})$ | $y_2 \times 10^4 (\text{Ms}^{-1})$ | $y(\text{avg}) \times 10^4 (\text{Ms}^{-1})$ |
|------------|------------------------------------|------------------------------------|----------------------------------------------|
| 0.05       | 5.20                               | 6.22                               | 5.57                                         |
| 0.10       | 9.30                               | 9.36                               | 9.33                                         |
| 0.15       | 11.91                              | 12.68                              | 12.30                                        |
| 0.20       | 13.59                              | 14.18                              | 13.89                                        |
| 0.25       | 17.71                              | 16.44                              | 17.08                                        |
| 0.30       | 17.17                              | 14.78                              | 15.98                                        |
| 0.35       | 14.75                              | 18.65                              | 16.70                                        |

### III. Computations

Geometries are optimized at the B3LYP level of theory using the 6-31G(d) basis set. Energies are defined as follows: G is the sum of electronic and thermal free energies calculated at the B3LYP level of theory.  $G_{MP2}$  is derived from a MP2 single point calculation corresponding to the DFT-optimized geometry and includes a thermal correction from the DFT calculation.

**Table S-1.** Geometric coordinates and thermally corrected MP2 energies for 1-bromooctane (**1**).

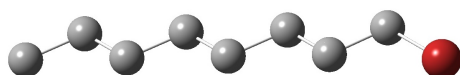

$G = -1811216.896$

$G_{MP2} = -1809526.815$

| Atom | X          | Y          | Z          | Atom | X          | Y          | Z          |
|------|------------|------------|------------|------|------------|------------|------------|
| C    | 5.3139760  | 0.3880240  | 0.0000020  | H    | -1.1757650 | -0.8001240 | 0.8797020  |
| H    | 5.3449380  | 1.0490260  | -0.8779690 | H    | -1.1757650 | -0.8001230 | -0.8797060 |
| H    | 5.3449370  | 1.0490220  | 0.8779760  | C    | -2.3349380 | 0.7815040  | 0.0000000  |
| C    | 3.9913370  | -0.3892720 | 0.0000000  | H    | -2.3769890 | 1.4103600  | -0.8904070 |
| H    | 3.9602060  | -1.0511170 | -0.8784480 | H    | -2.3769880 | 1.4103590  | 0.8904070  |
| H    | 3.9602040  | -1.0511200 | 0.8784460  | Br   | -4.0415220 | -0.2307080 | 0.0000010  |
| C    | 2.7506850  | 0.5127800  | 0.0000000  | C    | 6.5482420  | -0.5194580 | 0.0000000  |
| H    | 2.7827150  | 1.1743260  | -0.8785180 | H    | 7.4754390  | 0.0649280  | 0.0000020  |
| H    | 2.7827140  | 1.1743240  | 0.8785190  | H    | 6.5633830  | -1.1680860 | 0.8846170  |
| C    | 1.4282840  | -0.2647740 | -0.0000020 | H    | 6.5633840  | -1.1680820 | -0.8846200 |
| H    | 1.3935740  | -0.9254120 | 0.8785730  |      |            |            |            |
| H    | 1.3935750  | -0.9254100 | -0.8785780 |      |            |            |            |
| C    | 0.1902200  | 0.6421940  | -0.0000010 |      |            |            |            |
| H    | 0.2231170  | 1.3020030  | -0.8792750 |      |            |            |            |
| H    | 0.2231170  | 1.3020030  | 0.8792730  |      |            |            |            |
| C    | -1.1298960 | -0.1463460 | -0.0000010 |      |            |            |            |



**Table S-2.** Geometric coordinates and thermally corrected MP2 energies for 1-chlorooctane (5).

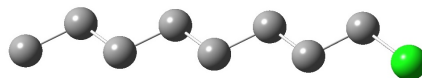

$G = -486237.0121$

$G_{MP2} = -485249.1627$

| Atom | X          | Y          | Z          | Atom | X          | Y          | Z          |
|------|------------|------------|------------|------|------------|------------|------------|
| C    | 4.3884360  | 0.4376570  | -0.0000010 | Cl   | -4.8136630 | -0.3438930 | -0.0000010 |
| H    | 4.4022570  | 1.0990540  | -0.8780230 | C    | 5.6457680  | -0.4376540 | -0.0000020 |
| H    | 4.4022580  | 1.0990530  | 0.8780220  | H    | 6.5574130  | 0.1706020  | 0.0000000  |
| C    | 3.0865790  | -0.3740740 | 0.0000000  | H    | 5.6775450  | -1.0855740 | 0.8846170  |
| H    | 3.0727830  | -1.0364000 | -0.8784510 | H    | 5.6775450  | -1.0855700 | -0.8846240 |
| H    | 3.0727840  | -1.0363990 | 0.8784530  |      |            |            |            |
| C    | 1.8225040  | 0.4950040  | 0.0000010  |      |            |            |            |
| H    | 1.8368930  | 1.1570040  | -0.8785650 |      |            |            |            |
| H    | 1.8368940  | 1.1570060  | 0.8785640  |      |            |            |            |
| C    | 0.5216240  | -0.3181270 | 0.0000030  |      |            |            |            |
| H    | 0.5051630  | -0.9793750 | 0.8785790  |      |            |            |            |
| H    | 0.5051630  | -0.9793790 | -0.8785700 |      |            |            |            |
| C    | -0.7410370 | 0.5542680  | 0.0000010  |      |            |            |            |
| H    | -0.7257350 | 1.2147550  | -0.8792300 |      |            |            |            |
| H    | -0.7257360 | 1.2147580  | 0.8792310  |      |            |            |            |
| C    | -2.0381880 | -0.2701310 | 0.0000010  |      |            |            |            |
| H    | -2.0664270 | -0.9239360 | 0.8804310  |      |            |            |            |
| H    | -2.0664260 | -0.9239390 | -0.8804260 |      |            |            |            |
| C    | -3.2703340 | 0.6241970  | -0.0000010 |      |            |            |            |
| H    | -3.3111100 | 1.2588470  | -0.8881420 |      |            |            |            |
| H    | -3.3111110 | 1.2588490  | 0.8881390  |      |            |            |            |

**Table S-3.** Geometric coordinates and thermally corrected MP2 energies for octyl trifluoromethanesulfonate (13).

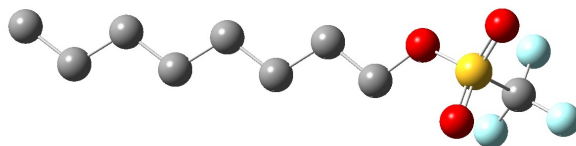

**G** = -800713.7399

**G<sub>MP2</sub>** = -798919.1428

| Atom | X          | Y          | Z          | Atom | X          | Y          | Z          |
|------|------------|------------|------------|------|------------|------------|------------|
| C    | 7.0176430  | 0.3746750  | 0.4607250  | O    | -1.7288470 | -0.5719900 | -0.5418120 |
| H    | 6.9402020  | 1.4439300  | 0.7042060  | S    | -3.1891180 | -0.8193910 | 0.1058580  |
| H    | 7.0322190  | -0.1556290 | 1.4235250  | O    | -3.9043940 | -1.7009820 | -0.7959320 |
| C    | 5.7763320  | -0.0533760 | -0.3328510 | O    | -3.0851650 | -1.0635760 | 1.5381930  |
| H    | 5.7614170  | 0.4779640  | -1.2961340 | C    | -3.9278730 | 0.8866350  | -0.0993890 |
| H    | 5.8542210  | -1.1230670 | -0.5781240 | F    | -5.1523860 | 0.8888400  | 0.4213650  |
| C    | 4.4576800  | 0.2021520  | 0.4082150  | F    | -3.9861950 | 1.2079690  | -1.3885540 |
| H    | 4.3805270  | 1.2717000  | 0.6540270  | F    | -3.1690670 | 1.7819500  | 0.5464060  |
| H    | 4.4729460  | -0.3302070 | 1.3707300  | C    | 8.3303770  | 0.1148440  | -0.2852450 |
| C    | 3.2174860  | -0.2254290 | -0.3871230 | H    | 9.1964260  | 0.4338180  | 0.3057340  |
| H    | 3.2930010  | -1.2943600 | -0.6338310 | H    | 8.4547830  | -0.9517610 | -0.5093770 |
| H    | 3.1984010  | 0.3085670  | -1.3482410 | H    | 8.3590730  | 0.6577970  | -1.2379860 |
| C    | 1.9009790  | 0.0287620  | 0.3591280  | H    | -0.6640620 | -0.7149000 | 1.2522990  |
| H    | 1.8240950  | 1.0976390  | 0.6058400  | H    | -0.7552900 | 0.9183830  | 0.5459440  |
| H    | 1.9183520  | -0.5070750 | 1.3190530  |      |            |            |            |
| C    | 0.6658620  | -0.4024720 | -0.4462640 |      |            |            |            |
| H    | 0.7250320  | -1.4709370 | -0.6872210 |      |            |            |            |
| H    | 0.6301930  | 0.1388790  | -1.3997730 |      |            |            |            |
| C    | -0.6184130 | -0.1436110 | 0.3226440  |      |            |            |            |

**Table S-4.** Geometric coordinates and thermally corrected MP2 energies for 1-bromo-4-(*tert*-butyl)cyclohexane (*trans*-17).

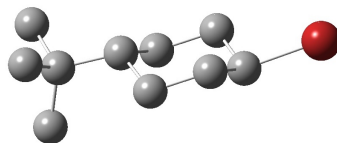

**G** = -1859753.221

**G<sub>MP2</sub>** = -1857933.555

| <b>Atom</b> | <b>X</b>   | <b>Y</b>   | <b>Z</b>   | <b>Atom</b> | <b>X</b>   | <b>Y</b>   | <b>Z</b>   |
|-------------|------------|------------|------------|-------------|------------|------------|------------|
| C           | 0.7356280  | -1.2621140 | -0.0964820 | H           | -4.5143560 | 0.0025900  | 1.5369830  |
| C           | 1.4085440  | 0.0000390  | 0.4272540  | H           | -3.0414940 | -0.8773810 | 1.9534000  |
| C           | 0.7355540  | 1.2621050  | -0.0966270 | H           | -0.8780350 | 1.3067460  | 1.3466600  |
| C           | -0.7660280 | 1.2552430  | 0.2545960  | H           | -1.2156350 | 2.1688410  | -0.1476540 |
| C           | -1.4857830 | -0.0001010 | -0.2863120 | H           | 1.2215860  | 2.1517240  | 0.3183000  |
| C           | -0.7660920 | -1.2555910 | 0.2543110  | H           | 0.8610630  | 1.3074110  | -1.1860970 |
| H           | -0.8786580 | -1.3079160 | 1.3463000  | H           | 1.4371280  | 0.0001300  | 1.5199520  |
| H           | -1.2152910 | -2.1689460 | -0.1488940 | Br          | 3.3442450  | 0.0000140  | -0.0812990 |
| H           | -1.3430920 | -0.0001290 | -1.3800000 | H           | 0.8612800  | -1.3074990 | -1.1859360 |
| C           | -3.0394320 | 0.0001070  | -0.0659570 | H           | 1.2217030  | -2.1516670 | 0.3185380  |
| C           | -3.6607860 | -1.2475300 | -0.7320060 |             |            |            |            |
| H           | -3.3620370 | -2.1771130 | -0.2366240 |             |            |            |            |
| H           | -4.7552720 | -1.1954150 | -0.6898390 |             |            |            |            |
| H           | -3.3726620 | -1.3206280 | -1.7884110 |             |            |            |            |
| C           | -3.6612730 | 1.2424460  | -0.7413820 |             |            |            |            |
| H           | -4.7556920 | 1.1924650  | -0.6949480 |             |            |            |            |
| H           | -3.3594090 | 2.1762590  | -0.2559680 |             |            |            |            |
| H           | -3.3766780 | 1.3050110  | -1.7994170 |             |            |            |            |
| C           | -3.4230270 | 0.0054150  | 1.4281540  |             |            |            |            |
| H           | -3.0468510 | 0.8949200  | 1.9458320  |             |            |            |            |

**Table S-5.** Geometric coordinates and thermally corrected MP2 energies for 1-bromo-4-(*tert*-butyl)cyclohexane (*cis*-17).

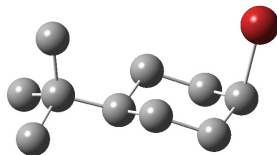

$G = -1859752.247$

$G_{MP2} = -1857933.939$

| Atom | X          | Y          | Z          | Atom | X          | Y          | Z          |
|------|------------|------------|------------|------|------------|------------|------------|
| C    | 0.8254970  | 1.2644400  | -1.2638350 | H    | -1.8097790 | -2.1023220 | -0.8853090 |
| C    | 1.6681040  | 1.1267220  | 0.0001210  | H    | -0.0807300 | -0.6861000 | 1.3125650  |
| C    | 0.8255300  | 1.2641690  | 1.2641340  | H    | -0.9886370 | 0.5559170  | 2.1687670  |
| C    | -0.4138840 | 0.3573820  | 1.2585370  | H    | 1.4390850  | 1.0737850  | 2.1509660  |
| C    | -1.2874210 | 0.5679160  | 0.0001180  | H    | 0.5076810  | 2.3177440  | 1.3171080  |
| C    | -0.4139830 | 0.3577440  | -1.2584390 | H    | 2.5089260  | 1.8217010  | 0.0001800  |
| H    | -0.0809750 | -0.6857650 | -1.3129110 | Br   | 2.5895950  | -0.6660640 | -0.0000810 |
| H    | -0.9888040 | 0.5567130  | -2.1685330 | H    | 0.5076900  | 2.3180400  | -1.3165950 |
| H    | -1.5969060 | 1.6277100  | 0.0002670  | H    | 1.4390230  | 1.0742180  | -2.1507240 |
| C    | -2.6211220 | -0.2578550 | -0.0000100 | H    | -3.3231770 | -2.3201800 | -0.0006670 |
| C    | -3.4605200 | 0.1061030  | -1.2446130 |      |            |            |            |
| H    | -2.9873610 | -0.2198320 | -2.1765290 |      |            |            |            |
| H    | -4.4438940 | -0.3765260 | -1.1946430 |      |            |            |            |
| H    | -3.6257460 | 1.1892290  | -1.3104420 |      |            |            |            |
| C    | -3.4607180 | 0.1059900  | 1.2445020  |      |            |            |            |
| H    | -4.4439590 | -0.3769080 | 1.1944890  |      |            |            |            |
| H    | -2.9875720 | -0.2197420 | 2.1764950  |      |            |            |            |
| H    | -3.6262330 | 1.1890780  | 1.3102170  |      |            |            |            |
| C    | -2.3687770 | -1.7795990 | -0.0000920 |      |            |            |            |
| H    | -1.8107070 | -2.1025860 | 0.8856060  |      |            |            |            |

**Table S-6.** Geometric coordinates and thermally corrected MP2 energies for

*exo*-2-bromonorbornane (**22**).

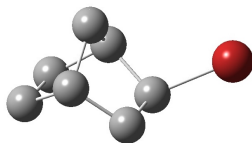

**G** = -1785108.188

**G<sub>MP2</sub>** = -1783523.483

| <b>Atom</b> | <b>X</b>   | <b>Y</b>   | <b>Z</b>   |
|-------------|------------|------------|------------|
| C           | 2.8023570  | 0.1815690  | -0.3465520 |
| C           | 1.7512270  | 1.0297340  | 0.4047310  |
| C           | 1.1471950  | -0.0108030 | 1.3743480  |
| C           | 0.7436720  | -0.9944070 | 0.2557720  |
| C           | 2.0929030  | -1.2048390 | -0.4843050 |
| H           | 1.9509550  | -1.5091910 | -1.5275410 |
| H           | 2.6670440  | -1.9983360 | 0.0061140  |
| C           | -0.1215250 | -0.1010280 | -0.6479200 |
| C           | 0.5597930  | 1.2933610  | -0.5507090 |
| H           | -0.1254150 | 2.0359410  | -0.1343840 |
| H           | 0.8787460  | 1.6537030  | -1.5355530 |
| H           | -0.2255590 | -0.4804430 | -1.6638450 |
| Br          | -2.0104760 | -0.0436680 | 0.0134060  |
| H           | 0.2492840  | -1.9193680 | 0.5582110  |
| H           | 0.2881010  | 0.3614690  | 1.9413250  |
| H           | 1.8816400  | -0.4315610 | 2.0703060  |
| H           | 2.1518340  | 1.9407440  | 0.8581940  |
| H           | 3.0725990  | 0.6182020  | -1.3144580 |
| H           | 3.7236910  | 0.0957010  | 0.2402350  |

**Table S-7.** Geometric coordinates and thermally corrected MP2 energies for *exo*-2-chloronorbornane (**23**).

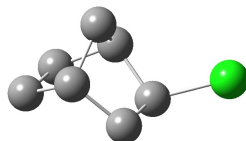

**G** = -459244.7103

**G<sub>MP2</sub>** = -460127.524

| <b>Atom</b> | <b>X</b>   | <b>Y</b>   | <b>Z</b>   |
|-------------|------------|------------|------------|
| C           | 2.2330990  | 0.1891480  | -0.4087050 |
| C           | 1.2078240  | 1.0421690  | 0.3731130  |
| C           | 0.6510360  | 0.0145160  | 1.3838400  |
| C           | 0.2126830  | -0.9921560 | 0.2990560  |
| C           | 1.5359420  | -1.2081950 | -0.4826910 |
| H           | 1.3605630  | -1.5436420 | -1.5111640 |
| H           | 2.1370180  | -1.9804920 | 0.0089800  |
| C           | -0.6917250 | -0.1239840 | -0.5962620 |
| C           | -0.0265880 | 1.2820420  | -0.5307390 |
| H           | -0.7082470 | 2.0085100  | -0.0802540 |
| H           | 0.2398440  | 1.6502980  | -1.5276900 |
| H           | -0.7795630 | -0.5168310 | -1.6099060 |
| Cl          | -2.4238110 | -0.0957230 | 0.0170780  |
| H           | -0.2645410 | -1.9149170 | 0.6347240  |
| H           | -0.1841580 | 0.3943170  | 1.9809730  |
| H           | 1.4158610  | -0.3893170 | 2.0568290  |
| H           | 1.6204230  | 1.9629830  | 0.7949880  |
| H           | 2.4511030  | 0.6074900  | -1.3976280 |
| H           | 3.1828560  | 0.1276490  | 0.1341570  |

**Table S-8.** Geometric coordinates and thermally corrected MP2 energies for (*E*)-1-bromocyclooct-1-ene (**26**).

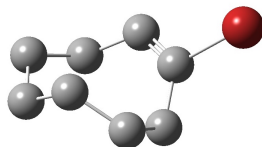

**G** = -1809733.726

**G<sub>MP2</sub>** = -1808066.159

| Atom | X          | Y          | Z          | Atom | X          | Y         | Z         |
|------|------------|------------|------------|------|------------|-----------|-----------|
| C    | -0.1146110 | 0.8015120  | 1.2198460  | H    | -0.8970570 | 0.4191860 | 1.8867140 |
| C    | -0.7130360 | 1.8969100  | 0.3099380  | H    | 0.6596560  | 1.2388760 | 1.8589480 |
| C    | -1.6997590 | 1.3917860  | -0.7583740 |      |            |           |           |
| C    | -2.8668200 | 0.5063330  | -0.2538850 |      |            |           |           |
| C    | -2.7102890 | -1.0200060 | -0.4251340 |      |            |           |           |
| C    | -1.6587310 | -1.7297160 | 0.4611350  |      |            |           |           |
| C    | -0.2195160 | -1.4529830 | 0.0808160  |      |            |           |           |
| C    | 0.4425280  | -0.3521050 | 0.4398750  |      |            |           |           |
| Br   | 2.2364970  | -0.0697820 | -0.2233030 |      |            |           |           |
| H    | 0.2736470  | -2.1838850 | -0.5550610 |      |            |           |           |
| H    | -1.8405000 | -1.4616430 | 1.5102950  |      |            |           |           |
| H    | -1.8274880 | -2.8111800 | 0.3921830  |      |            |           |           |
| H    | -3.6838940 | -1.4825240 | -0.2114830 |      |            |           |           |
| H    | -2.4942950 | -1.2385240 | -1.4802170 |      |            |           |           |
| H    | -3.7733800 | 0.7870260  | -0.8053440 |      |            |           |           |
| H    | -3.0854840 | 0.7362110  | 0.7995630  |      |            |           |           |
| H    | -2.1153400 | 2.2784370  | -1.2540220 |      |            |           |           |
| H    | -1.1444410 | 0.8505050  | -1.5342410 |      |            |           |           |
| H    | 0.1048260  | 2.4278730  | -0.1933300 |      |            |           |           |
| H    | -1.2122430 | 2.6316250  | 0.9562810  |      |            |           |           |

**Table S-9.** Geometric coordinates and thermally corrected MP2 energies for symmetrical cycloocta-1,2-diene (**28a**).

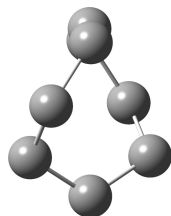

**G** = -195579.7717

**G<sub>MP2</sub>** = -194980.1683

| <b>Atom</b> | <b>X</b>   | <b>Y</b>   | <b>Z</b>   |
|-------------|------------|------------|------------|
| C           | 1.9641272  | -0.1227573 | 0.0944600  |
| C           | 1.1379571  | -1.2963110 | 0.6072425  |
| C           | -0.0286548 | -1.5422203 | 0.0626315  |
| C           | -1.1874122 | -1.2980169 | -0.4992301 |
| C           | -1.9739886 | -0.0642800 | -0.0726817 |
| C           | -1.1249772 | 0.9537735  | 0.7112061  |
| C           | 0.0238703  | 1.6648582  | -0.0520486 |
| C           | 1.1479887  | 0.8639249  | -0.7611907 |
| H           | 1.8457560  | 1.6027126  | -1.1788609 |
| H           | 0.7323567  | 0.3257756  | -1.6203804 |
| H           | 0.4985588  | 2.3495074  | 0.6660110  |
| H           | -0.4290508 | 2.3115904  | -0.8177389 |
| H           | -0.7261241 | 0.4650772  | 1.6071161  |
| H           | -1.7977152 | 1.7429255  | 1.0742410  |
| H           | -2.8572192 | -0.3411276 | 0.5221997  |
| H           | -2.3674477 | 0.4046403  | -0.9868382 |
| H           | -1.5645889 | -1.8914756 | -1.3316460 |
| H           | 1.4962219  | -1.8406017 | 1.4806087  |
| H           | 2.3738672  | 0.3971789  | 0.9731815  |
| H           | 2.8370717  | -0.4702643 | -0.4781036 |



**Table S-10.** Geometric coordinates and thermally corrected MP2 energies for asymmetrical cycloocta-1,2-diene (**28b**).

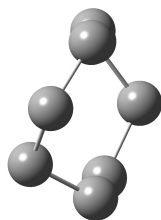

**G** = -195580.4394

**G<sub>MP2</sub>** = -194980.247

| <b>Atom</b> | <b>X</b>   | <b>Y</b>   | <b>Z</b>   |
|-------------|------------|------------|------------|
| C           | 1.9508098  | -0.3501015 | -0.3658589 |
| C           | 1.0477736  | -1.4318243 | 0.2050154  |
| C           | -0.1871796 | -1.5154762 | -0.2220103 |
| C           | -1.3908944 | -1.1882561 | -0.6202889 |
| C           | -2.0411713 | 0.0685462  | -0.0620997 |
| C           | -1.0634411 | 0.9981615  | 0.6837647  |
| C           | 0.1268665  | 1.5467498  | -0.1622804 |
| C           | 1.5540406  | 1.0447254  | 0.1769140  |
| H           | 1.6873165  | 1.0586005  | 1.2680259  |
| H           | 2.2735107  | 1.7721658  | -0.2251943 |
| H           | 0.1477206  | 2.6372239  | -0.0402166 |
| H           | -0.0686042 | 1.3747644  | -1.2297091 |
| H           | -1.6502428 | 1.8445758  | 1.0628202  |
| H           | -0.6796974 | 0.4793064  | 1.5703886  |
| H           | -2.8831047 | -0.1857278 | 0.5993159  |
| H           | -2.4848793 | 0.6124192  | -0.9097899 |
| H           | -1.9202296 | -1.7461956 | -1.3923361 |
| H           | 1.3939556  | -2.0071039 | 1.0635880  |
| H           | 2.9994550  | -0.5515322 | -0.1145384 |
| H           | 1.8808824  | -0.3409364 | -1.4604200 |

**Table S-11.** Geometric coordinates and thermally corrected MP2 energies for the isomerization of asymmetrical cycloocta-1,2-diene (**28b**) to symmetrical cycloocta-1,2-diene (**28a**).

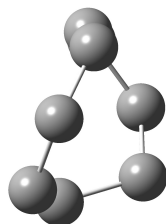

**G** = -195571.4341

**G<sub>MP2</sub>** = -194970.5996

| Atom | X          | Y          | Z          |   |           |            |            |
|------|------------|------------|------------|---|-----------|------------|------------|
| C    | 1.9994747  | -0.1348541 | 0.3249512  | H | 2.7828707 | -0.5769275 | -0.3068090 |
| C    | 1.0904652  | -1.1955795 | 0.9399226  |   |           |            |            |
| C    | -0.0189419 | -1.4831137 | 0.3068522  |   |           |            |            |
| C    | -1.0326050 | -1.3987288 | -0.5170324 |   |           |            |            |
| C    | -1.9369858 | -0.1862120 | -0.6406681 |   |           |            |            |
| C    | -1.4786696 | 1.1812750  | -0.0390456 |   |           |            |            |
| C    | 0.0012441  | 1.4908512  | 0.3515130  |   |           |            |            |
| C    | 1.1822767  | 0.9070748  | -0.4775065 |   |           |            |            |
| H    | 1.8608604  | 1.7131762  | -0.7843019 |   |           |            |            |
| H    | 0.8181082  | 0.4500101  | -1.4040223 |   |           |            |            |
| H    | 0.1461137  | 1.1939117  | 1.3954359  |   |           |            |            |
| H    | 0.0782562  | 2.5857497  | 0.3503697  |   |           |            |            |
| H    | -2.0693846 | 1.3747714  | 0.8648248  |   |           |            |            |
| H    | -1.8052472 | 1.9436852  | -0.7575873 |   |           |            |            |
| H    | -2.9412190 | -0.4156577 | -0.2550769 |   |           |            |            |
| H    | -2.0813747 | -0.0573877 | -1.7224172 |   |           |            |            |
| H    | -1.1959751 | -2.1869858 | -1.2544878 |   |           |            |            |
| H    | 1.3112660  | -1.5735594 | 1.9369260  |   |           |            |            |
| H    | 2.5213780  | 0.3734418  | 1.1475166  |   |           |            |            |

**Table S-12.** Geometric coordinates and thermally corrected MP2 energies for THF.

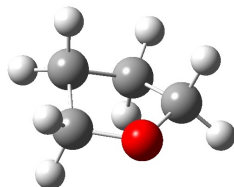

**G** = -145737.157

**G<sub>MP2</sub>** = -145310.7976

| <b>Atom</b> | <b>X</b>   | <b>Y</b>   | <b>Z</b>   |
|-------------|------------|------------|------------|
| C           | -1.1655770 | -0.4304460 | -0.1316510 |
| H           | -1.5359580 | -0.4831270 | -1.1673560 |
| H           | -1.9488020 | -0.8230080 | 0.5275430  |
| C           | -0.7333840 | 0.9970250  | 0.2267570  |
| H           | -0.7966490 | 1.1557780  | 1.3100440  |
| H           | -1.3434230 | 1.7616460  | -0.2642560 |
| C           | 0.7339430  | 0.9965910  | -0.2269410 |
| H           | 0.7973310  | 1.1548800  | -1.3102840 |
| H           | 1.3443500  | 1.7610810  | 0.2638280  |
| C           | 1.1652710  | -0.4309590 | 0.1320600  |
| H           | 1.9488890  | -0.8240060 | -0.5263660 |
| H           | 1.5347420  | -0.4835500 | 1.1681130  |
| O           | -0.0002500 | -1.2516200 | -0.0003270 |

**Table S-13.** Geometric coordinates and thermally corrected MP2 energies for NaDA ground-state  $A_2(\text{THF})_4$ .

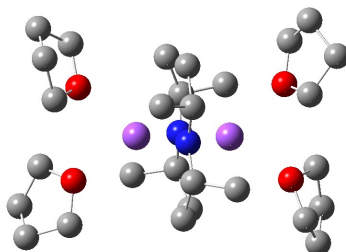

$G = -1152417.329$

$G_{\text{MP2}} = -1149102.475$

| Atom | X          | Y          | Z          | Atom | X          | Y          | Z          |
|------|------------|------------|------------|------|------------|------------|------------|
| Na   | -1.4745010 | -0.0632710 | -0.0235120 | H    | 1.4159540  | -2.9220130 | 0.0308580  |
| Na   | 1.5318880  | -0.0837150 | -0.0153470 | H    | -0.2902890 | -2.8883490 | 0.5107590  |
| N    | 0.0480430  | -1.1761660 | -1.6084690 | C    | -1.3387470 | -3.2360300 | -2.0563500 |
| C    | 0.1694240  | -0.6602420 | -2.9692230 | H    | -1.6880690 | -2.8019560 | -3.0002740 |
| H    | -0.4391800 | -1.2515570 | -3.6856630 | H    | -1.2901530 | -4.3272000 | -2.1901370 |
| C    | 1.6173190  | -0.7046300 | -3.5272920 | H    | -2.0883350 | -3.0173860 | -1.2853010 |
| H    | 1.6660960  | -0.4095990 | -4.5863350 | N    | 0.0436240  | 0.9620520  | 1.6283840  |
| H    | 2.2667120  | -0.0262920 | -2.9563270 | C    | 0.1629600  | 0.3853700  | 2.9640200  |
| H    | 2.0364470  | -1.7149110 | -3.4483130 | H    | -0.6048770 | 0.7831280  | 3.6620500  |
| C    | -0.3591310 | 0.7771420  | -3.0699780 | C    | 1.5227050  | 0.6404950  | 3.6656670  |
| H    | 0.1590080  | 1.4365080  | -2.3605390 | H    | 1.5496610  | 0.1956660  | 4.6704000  |
| H    | -0.2204570 | 1.1961090  | -4.0758830 | H    | 2.3433580  | 0.2066400  | 3.0763150  |
| H    | -1.4296400 | 0.8116060  | -2.8348000 | H    | 1.7276340  | 1.7111730  | 3.7780880  |
| C    | 0.0271220  | -2.6365720 | -1.6314440 | C    | -0.0808510 | -1.1279190 | 2.9182160  |
| H    | 0.7700500  | -3.0423870 | -2.3523090 | H    | -0.0389550 | -1.5743730 | 3.9205700  |
| C    | 0.4062580  | -3.2286650 | -0.2668280 | H    | -1.0667210 | -1.3524080 | 2.4933100  |
| H    | 0.3735860  | -4.3267510 | -0.2805270 | H    | 0.6699010  | -1.6337420 | 2.2966250  |
| C    | 0.1180760  | 2.4186890  | 1.6539680  | H    | 1.0966840  | 2.7865630  | 2.0449150  |
| C    | -0.9440190 | 3.1314560  | 2.5304000  | H    | 5.3871050  | -3.7911540 | 1.6592860  |

|   |            |            |            |   |            |            |            |
|---|------------|------------|------------|---|------------|------------|------------|
| H | -0.8438370 | 4.2238800  | 2.4653710  | H | 5.6388130  | -3.5342260 | -0.7121630 |
| H | -1.9551740 | 2.8575990  | 2.2008830  | H | 3.9006430  | -3.7803170 | -0.9305790 |
| H | -0.8583860 | 2.8609410  | 3.5879860  | O | -3.4695290 | -1.4404060 | 0.5393580  |
| C | 0.0185850  | 2.9789940  | 0.2279000  | C | -4.4738530 | -1.6560670 | -0.4757560 |
| H | -0.9483170 | 2.7203850  | -0.2233340 | H | -5.2225710 | -0.8558490 | -0.4101070 |
| H | 0.1102680  | 4.0736640  | 0.2192520  | H | -3.9887420 | -1.6012620 | -1.4539740 |
| H | 0.8112090  | 2.5716710  | -0.4093050 | C | -5.0889850 | -3.0243470 | -0.1740300 |
| O | 3.2577980  | 1.5416510  | -0.6638420 | C | -4.9638820 | -3.0982440 | 1.3553370  |
| C | 3.9857410  | 2.0219660  | 0.4919400  | C | -3.6126820 | -2.4178520 | 1.5911700  |
| H | 3.2579640  | 2.3311640  | 1.2515300  | H | -3.5447420 | -1.9016160 | 2.5538340  |
| H | 4.5765230  | 1.1930680  | 0.8925230  | H | -2.7854400 | -3.1364570 | 1.5218640  |
| C | 4.8326480  | 3.2018480  | 0.0024160  | H | -5.7700750 | -2.5292250 | 1.8340020  |
| C | 3.9941480  | 3.7343840  | -1.1697470 | H | -4.9913180 | -4.1199540 | 1.7458670  |
| C | 3.4510790  | 2.4390760  | -1.7742680 | H | -4.4982270 | -3.8189740 | -0.6439690 |
| H | 2.4928980  | 2.5597860  | -2.2872250 | H | -6.1200620 | -3.1081090 | -0.5312060 |
| H | 4.1689420  | 1.9945590  | -2.4785430 | O | -3.3798430 | 1.4669330  | -0.5936400 |
| H | 3.1698500  | 4.3540500  | -0.7984710 | C | -4.2223680 | 1.8421640  | 0.5128200  |
| H | 4.5722940  | 4.3244270  | -1.8874770 | H | -5.1178640 | 1.2037760  | 0.5261900  |
| H | 5.8100450  | 2.8557700  | -0.3553700 | H | -3.6599370 | 1.6727060  | 1.4339750  |
| H | 5.0034250  | 3.9449820  | 0.7871290  | C | -4.5910330 | 3.3033560  | 0.2651240  |
| O | 3.5270160  | -1.3789260 | 0.5680030  | C | -4.7116000 | 3.3327290  | -1.2666450 |
| C | 4.4239670  | -1.7202000 | -0.4966710 | C | -3.5995450 | 2.3670140  | -1.7022990 |
| H | 3.9520080  | -1.4221720 | -1.4344730 | H | -3.8647470 | 1.7802710  | -2.5886700 |
| H | 5.3660330  | -1.1612940 | -0.3774660 | H | -2.6598550 | 2.8935520  | -1.9058840 |
| C | 4.6503900  | -3.2324120 | -0.3525370 | H | -5.6935320 | 2.9562590  | -1.5771100 |
| C | 4.4582220  | -3.4859690 | 1.1678370  | H | -4.5843960 | 4.3318020  | -1.6940450 |
| C | 3.9634930  | -2.1266860 | 1.7108940  | H | -3.7808030 | 3.9593460  | 0.6029010  |
| H | 3.1175580  | -2.1988930 | 2.3971970  | H | -5.5108880 | 3.5999960  | 0.7785850  |
| H | 4.7769180  | -1.5813150 | 2.2134040  |   |            |            |            |
| H | 3.7189100  | -4.2727580 | 1.3412860  |   |            |            |            |

**Table S-14.** Geometric coordinates and thermally corrected MP2 energies for the A(THF)<sub>3</sub> mediated anti elimination of 1-bromooctane (**1**).

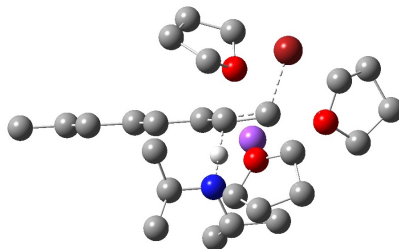

$G = -2533131.623$

$G_{MP2} = -2529373.821$

| Atom | X          | Y          | Z          | Atom | X          | Y          | Z          |
|------|------------|------------|------------|------|------------|------------|------------|
| Na   | 1.5333060  | -0.5832620 | 0.0551840  | C    | -0.8252510 | -2.5028480 | 1.1832420  |
| N    | -0.2261390 | -1.7551790 | -1.0752910 | H    | -1.0782790 | -1.4694150 | 1.4384490  |
| C    | -0.1863270 | -2.0120450 | -2.5221690 | H    | -1.4763580 | -3.1628930 | 1.7700920  |
| H    | 0.2319070  | -3.0154380 | -2.7177450 | H    | 0.2112750  | -2.6923750 | 1.4997100  |
| C    | -1.5637370 | -1.9672380 | -3.2225930 | O    | 1.3752390  | 0.4278970  | 2.2243360  |
| H    | -1.4721560 | -2.2036680 | -4.2908490 | C    | 1.6341500  | -0.3966440 | 3.3713090  |
| H    | -2.2625610 | -2.6889560 | -2.7855120 | H    | 1.8656390  | -1.4015120 | 3.0114570  |
| H    | -2.0158300 | -0.9721320 | -3.1329820 | H    | 2.5130520  | -0.0033940 | 3.9051390  |
| C    | 0.7673130  | -1.0198330 | -3.2027690 | C    | 0.3665290  | -0.3016310 | 4.2442130  |
| H    | 1.7725930  | -1.0826710 | -2.7648070 | C    | -0.3112200 | 1.0133320  | 3.7660680  |
| H    | 0.8574600  | -1.2292350 | -4.2760320 | C    | 0.6804600  | 1.5830010  | 2.7415660  |
| H    | 0.4098750  | 0.0111050  | -3.0975140 | H    | 0.2257810  | 2.1193390  | 1.9061900  |
| C    | -0.9810140 | -2.7654980 | -0.3221000 | H    | 1.4133330  | 2.2447390  | 3.2295240  |
| H    | -2.0668860 | -2.7001100 | -0.5371580 | H    | -1.2714950 | 0.8031950  | 3.2863830  |
| C    | -0.5833740 | -4.2282700 | -0.6091640 | H    | -0.4950310 | 1.7167690  | 4.5832940  |
| H    | -1.1219220 | -4.9089310 | 0.0625160  | H    | 0.6194560  | -0.2808030 | 5.3086070  |
| H    | -0.8148610 | -4.5345600 | -1.6341910 | H    | -0.2876180 | -1.1611340 | 4.0742670  |
| H    | 0.4931270  | -4.3739160 | -0.4501520 | O    | 3.0297700  | 1.1980040  | -0.7387950 |
| C    | 3.2082420  | 1.6813500  | -2.0960720 | C    | -5.3184830 | 0.2020830  | -0.4044110 |

|   |            |            |            |    |            |            |            |
|---|------------|------------|------------|----|------------|------------|------------|
| H | 3.9633350  | 1.0642670  | -2.5977040 | H  | -5.5766870 | 1.2356900  | -0.1297260 |
| H | 2.2551840  | 1.5530700  | -2.6160210 | H  | -5.4809230 | 0.1286170  | -1.4902690 |
| C | 3.6261510  | 3.1614500  | -1.9919370 | C  | -3.8359210 | -0.0477820 | -0.0991220 |
| C | 3.2549740  | 3.5308430  | -0.5450630 | H  | -3.5753030 | -1.0770010 | -0.3825730 |
| C | 3.5014520  | 2.2121190  | 0.1778040  | H  | -3.6765920 | 0.0183040  | 0.9884780  |
| H | 4.5734400  | 2.0546120  | 0.3768820  | C  | -2.8952680 | 0.9359300  | -0.8052160 |
| H | 2.9471630  | 2.0872970  | 1.1087150  | H  | -3.1735350 | 1.9632440  | -0.5175150 |
| H | 3.8605280  | 4.3505470  | -0.1458080 | H  | -3.0626430 | 0.8743550  | -1.8924070 |
| H | 2.1965890  | 3.8038140  | -0.4686000 | C  | -1.4123570 | 0.7203040  | -0.5064370 |
| H | 3.1132260  | 3.7830400  | -2.7310710 | H  | -1.2411110 | 0.6229860  | 0.5757020  |
| H | 4.7049480  | 3.2685250  | -2.1535350 | C  | -0.5270110 | 1.6949740  | -1.0931880 |
| O | 3.3522710  | -2.0080010 | 0.6091160  | H  | -0.7353630 | 1.9736970  | -2.1256700 |
| C | 3.3338830  | -3.4308190 | 0.3330050  | H  | 0.5396380  | 1.5787780  | -0.9189940 |
| H | 2.7948390  | -3.9373390 | 1.1401880  | Br | -0.6368830 | 3.7479060  | -0.2034110 |
| H | 2.7835060  | -3.5877460 | -0.6012080 | C  | -8.6900420 | -1.4963290 | 0.7155330  |
| C | 4.8003420  | -3.8657380 | 0.2207130  | H  | -9.7391350 | -1.3003830 | 0.4647660  |
| C | 5.4957020  | -2.5678130 | -0.2181410 | H  | -8.4715790 | -2.5368150 | 0.4443020  |
| C | 4.7097810  | -1.5181070 | 0.5659080  | H  | -8.5867850 | -1.4115070 | 1.8045860  |
| H | 5.0926670  | -1.4192310 | 1.5920210  | H  | -0.9091600 | -0.4955230 | -0.8931500 |
| H | 4.6869030  | -0.5322240 | 0.0962490  |    |            |            |            |
| H | 6.5658640  | -2.5502900 | 0.0088470  |    |            |            |            |
| H | 5.3709180  | -2.4103960 | -1.2961560 |    |            |            |            |
| H | 4.9344590  | -4.6905250 | -0.4851550 |    |            |            |            |
| H | 5.1829620  | -4.1901560 | 1.1955120  |    |            |            |            |
| C | -7.7487840 | -0.5267660 | -0.0067330 |    |            |            |            |
| H | -8.0145960 | 0.5066530  | 0.2581310  |    |            |            |            |
| H | -7.9010730 | -0.6094520 | -1.0923770 |    |            |            |            |
| C | -6.2676440 | -0.7655810 | 0.3138400  |    |            |            |            |
| H | -6.1154820 | -0.6852860 | 1.4009250  |    |            |            |            |
| H | -6.0026940 | -1.8000770 | 0.0475570  |    |            |            |            |

**Table S-15.** Geometric coordinates and thermally corrected MP2 energies for the A(THF)<sub>3</sub>

mediated *syn* elimination of 1-bromooctane (**1**).

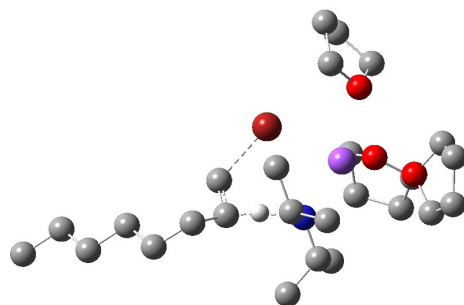

**G** = -2533134.885

**G<sub>MP2</sub>** = -2529375.904

| Atom | X          | Y          | Z          | Atom | X           | Y          | Z          |
|------|------------|------------|------------|------|-------------|------------|------------|
| C    | -7.9973900 | -0.8952690 | 0.2320520  | H    | -2.6214570  | -1.2781400 | 1.1748740  |
| H    | -7.9332150 | -1.5931600 | -0.6150470 | Br   | -0.5951950  | -1.9341970 | -0.3649240 |
| H    | -7.5280160 | -1.4086380 | 1.0835080  | C    | -9.4695370  | -0.6172080 | 0.5532550  |
| C    | -7.1981140 | 0.3722010  | -0.0961180 | H    | -10.0127000 | -1.5420030 | 0.7799500  |
| H    | -7.6686550 | 0.8867140  | -0.9473980 | H    | -9.5675740  | 0.0474650  | 1.4206490  |
| H    | -7.2635590 | 1.0703290  | 0.7521040  | H    | -9.9749660  | -0.1328030 | -0.2914530 |
| C    | -5.7216860 | 0.1028630  | -0.4173700 | N    | 0.0078300   | 1.7917990  | -0.3861760 |
| H    | -5.6571090 | -0.5879530 | -1.2719660 | C    | -0.0154660  | 2.8554550  | 0.6199070  |
| H    | -5.2611620 | -0.4206090 | 0.4326730  | H    | 0.8834070   | 3.4998400  | 0.5220570  |
| C    | -4.9269910 | 1.3761420  | -0.7310820 | C    | -1.2142030  | 3.8345130  | 0.5590120  |
| H    | -4.9875460 | 2.0569820  | 0.1318100  | H    | -1.1118010  | 4.6166520  | 1.3227100  |
| H    | -5.4178570 | 1.9025750  | -1.5633560 | H    | -1.2799000  | 4.3350800  | -0.4129610 |
| C    | -3.4439560 | 1.1675700  | -1.0942700 | H    | -2.1654380  | 3.3197350  | 0.7330520  |
| H    | -3.0366790 | 2.1386880  | -1.3996490 | C    | 0.0670750   | 2.2297060  | 2.0212580  |
| H    | -3.3698750 | 0.5192810  | -1.9799970 | H    | 0.9820580   | 1.6350820  | 2.1311970  |
| C    | -2.5659640 | 0.5865190  | 0.0280190  | H    | 0.0691270   | 2.9998460  | 2.8032980  |
| H    | -2.7666410 | 1.0719120  | 0.9927370  | H    | -0.7836690  | 1.5630800  | 2.2041040  |
| C    | -2.6019150 | -0.8502890 | 0.1780820  | C    | -0.0239880  | 2.2826370  | -1.7666270 |
| H    | -3.1362050 | -1.4439180 | -0.5553970 | H    | 4.3240020   | -3.0662810 | -0.7224180 |
| C    | 1.1446640  | 3.2260800  | -2.1337870 | H    | -0.9496680  | 2.8537750  | -1.9787050 |



|    |            |            |            |   |            |            |            |
|----|------------|------------|------------|---|------------|------------|------------|
| H  | 1.1403180  | 4.1469840  | -1.5401420 | H | 1.4181720  | -4.0261330 | -0.8750800 |
| H  | 2.1047930  | 2.7188020  | -1.9677110 | H | 2.8827890  | -5.0299990 | -1.0504020 |
| H  | 1.0912650  | 3.5179720  | -3.1909120 | H | 3.4215680  | -3.9689580 | -3.1954610 |
| C  | -0.0162810 | 1.0930250  | -2.7374830 | H | 1.6575340  | -4.0898100 | -3.3117110 |
| H  | -0.7641670 | 0.3446040  | -2.4609680 | O | 3.7149600  | 1.1174840  | 0.2057120  |
| H  | -0.2081200 | 1.4214190  | -3.7669590 | C | 3.9362550  | 2.4886980  | 0.5701130  |
| H  | 0.9641820  | 0.5954880  | -2.7299510 | H | 2.9634760  | 2.9819020  | 0.5793000  |
| Na | 1.5248300  | -0.0552310 | -0.0223860 | H | 4.3660240  | 2.5305330  | 1.5828610  |
| O  | 2.1031100  | -1.1262030 | 2.1539070  | C | 4.9248910  | 3.0628100  | -0.4730540 |
| C  | 1.1813510  | -1.9680380 | 2.8675410  | C | 5.4320300  | 1.8101190  | -1.2345030 |
| H  | 0.3525220  | -2.1730430 | 2.1890710  | C | 4.9457700  | 0.6485510  | -0.3603520 |
| H  | 1.6811910  | -2.9148950 | 3.1288360  | H | 4.7189300  | -0.2687790 | -0.9044880 |
| C  | 0.8252960  | -1.1628440 | 4.1219240  | H | 5.6658450  | 0.4305090  | 0.4455520  |
| C  | 2.1222420  | -0.3587200 | 4.4111410  | H | 4.9693540  | 1.7495810  | -2.2247480 |
| C  | 2.9847570  | -0.5825820 | 3.1458560  | H | 6.5179900  | 1.8038880  | -1.3696960 |
| H  | 3.4204780  | 0.3252270  | 2.7254490  | H | 5.7422830  | 3.5995940  | 0.0185510  |
| H  | 3.7938380  | -1.3019170 | 3.3447610  | H | 4.4289790  | 3.7643690  | -1.1491770 |
| H  | 1.9017590  | 0.7015240  | 4.5634110  | H | -1.4200420 | 1.0039020  | -0.1739620 |
| H  | 2.6394570  | -0.7203140 | 5.3053460  |   |            |            |            |
| H  | 0.5271960  | -1.8038820 | 4.9570880  |   |            |            |            |
| H  | -0.0048530 | -0.4847790 | 3.9026330  |   |            |            |            |
| O  | 2.8561650  | -1.7277680 | -1.3595740 |   |            |            |            |
| C  | 2.3853020  | -2.1198930 | -2.6747670 |   |            |            |            |
| H  | 1.3525870  | -1.7731660 | -2.7745290 |   |            |            |            |
| H  | 3.0036430  | -1.6240550 | -3.4320320 |   |            |            |            |
| C  | 2.4778350  | -3.6526610 | -2.7349910 |   |            |            |            |
| C  | 2.4468480  | -4.0458350 | -1.2493540 |   |            |            |            |
| C  | 3.2393690  | -2.9050290 | -0.6181240 |   |            |            |            |
| H  | 3.0069430  | -2.7174870 | 0.4324720  |   |            |            |            |

**Table S-16.** Geometric coordinates and thermally corrected MP2 energies for the A(THF)<sub>2</sub> mediated *syn* elimination of 1-chlorooctane (**5**).

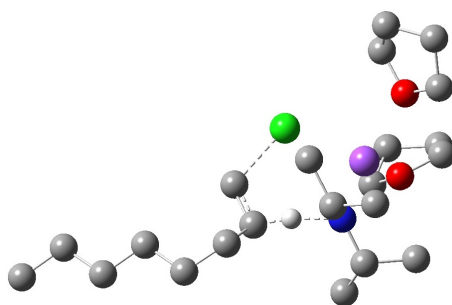

**G** = -1062420.29

**G<sub>MP2</sub>** = -1059766.456

| <b>Atom</b> | <b>X</b>   | <b>Y</b>   | <b>Z</b>   | <b>Atom</b> | <b>X</b>   | <b>Y</b>   | <b>Z</b>   |
|-------------|------------|------------|------------|-------------|------------|------------|------------|
| C           | -7.4078370 | 0.8812370  | 1.4136980  | H           | -2.3643060 | 0.0418850  | 1.7868010  |
| H           | -7.3225150 | 0.2390860  | 2.3019810  | H           | -2.2695920 | 1.6745740  | 0.9943520  |
| H           | -6.8663440 | 1.8068560  | 1.6560310  | Cl          | 0.0011460  | 1.0077310  | 1.7448790  |
| C           | -6.7243520 | 0.1930680  | 0.2251190  | Na          | 1.6647800  | 0.0774620  | -0.1202140 |
| H           | -7.2674800 | -0.7322210 | -0.0189790 | N           | 0.2970780  | -1.3396110 | -1.3304850 |
| H           | -6.8094760 | 0.8365770  | -0.6634510 | C           | 0.3260200  | -1.2424140 | -2.7960910 |
| C           | -5.2457680 | -0.1362130 | 0.4719570  | H           | -0.0815490 | -2.1648570 | -3.2525570 |
| H           | -5.1619210 | -0.7857140 | 1.3565210  | C           | -0.5350320 | -0.0823000 | -3.3281380 |
| H           | -4.7113960 | 0.7913920  | 0.7236700  | H           | -0.4038980 | 0.0371470  | -4.4110960 |
| C           | -4.5678950 | -0.8164430 | -0.7232110 | H           | -1.5994420 | -0.2484910 | -3.1371050 |
| H           | -4.6414650 | -0.1590920 | -1.6026390 | H           | -0.2476900 | 0.8641620  | -2.8507270 |
| H           | -5.1346940 | -1.7243830 | -0.9782520 | C           | 1.7641190  | -1.0609270 | -3.3421650 |
| C           | -3.0945880 | -1.2115220 | -0.5162370 | H           | 2.4329520  | -1.8472320 | -2.9801270 |
| H           | -2.7801840 | -1.8197770 | -1.3739550 | H           | 1.7860630  | -1.0728130 | -4.4414120 |
| H           | -3.0105130 | -1.8645470 | 0.3642990  | H           | 2.1687360  | -0.0931830 | -3.0127880 |
| C           | -2.1023050 | -0.0353700 | -0.3789960 | C           | 0.1548990  | -2.7177920 | -0.8552090 |
| H           | -2.2531330 | 0.7019720  | -1.1761050 | H           | -0.7947530 | -3.1624560 | -1.2233060 |
| C           | -2.0728890 | 0.6125010  | 0.9100470  | C           | 1.2648390  | -3.6906010 | -1.3194230 |
| H           | 1.3109690  | -3.7748060 | -2.4095700 | H           | 2.5814100  | 4.0511270  | 0.9321550  |
| H           | 2.2491400  | -3.3517840 | -0.9659790 | H           | 2.3159760  | 5.3040350  | -0.2976070 |
| H           | 1.0871650  | -4.6976550 | -0.9182270 | C           | -8.8834010 | 1.2052400  | 1.1583480  |

|   |            |            |            |   |            |            |            |
|---|------------|------------|------------|---|------------|------------|------------|
| C | 0.1000810  | -2.7475520 | 0.6794270  | H | -9.3421020 | 1.6967830  | 2.0240730  |
| H | -0.6569530 | -2.0667960 | 1.0765390  | H | -8.9989750 | 1.8735270  | 0.2959600  |
| H | -0.1202810 | -3.7587620 | 1.0438880  | H | -9.4586030 | 0.2948170  | 0.9488660  |
| H | 1.0671350  | -2.4455600 | 1.1068740  | H | -1.0323670 | -0.5448670 | -0.7005820 |
| O | 3.5820480  | -0.4514920 | 1.1635110  |   |            |            |            |
| C | 3.5204390  | -0.2084880 | 2.5859810  |   |            |            |            |
| H | 4.2413290  | 0.5779800  | 2.8557010  |   |            |            |            |
| H | 2.5098820  | 0.1383290  | 2.8155540  |   |            |            |            |
| C | 3.8950920  | -1.5435640 | 3.2217650  |   |            |            |            |
| C | 4.9917790  | -2.0454550 | 2.2666140  |   |            |            |            |
| C | 4.5269550  | -1.5147890 | 0.8973600  |   |            |            |            |
| H | 5.3540280  | -1.1175260 | 0.2971050  |   |            |            |            |
| H | 4.0084120  | -2.2796300 | 0.3090360  |   |            |            |            |
| H | 5.9597750  | -1.6097650 | 2.5390630  |   |            |            |            |
| H | 5.1022230  | -3.1336570 | 2.2712400  |   |            |            |            |
| H | 3.0313890  | -2.2181350 | 3.2128450  |   |            |            |            |
| H | 4.2395380  | -1.4391730 | 4.2550160  |   |            |            |            |
| O | 2.5041670  | 2.0759420  | -1.0061110 |   |            |            |            |
| C | 1.7142010  | 3.2766760  | -0.8890060 |   |            |            |            |
| H | 1.4572640  | 3.6466580  | -1.8925160 |   |            |            |            |
| H | 0.7988960  | 3.0142230  | -0.3529140 |   |            |            |            |
| C | 2.6105480  | 4.2616270  | -0.1430320 |   |            |            |            |
| C | 3.9932940  | 3.9303470  | -0.7297950 |   |            |            |            |
| C | 3.9100880  | 2.4120480  | -0.9712000 |   |            |            |            |
| H | 4.3722950  | 2.1112310  | -1.9186520 |   |            |            |            |
| H | 4.3645200  | 1.8316420  | -0.1607360 |   |            |            |            |
| H | 4.1401760  | 4.4619020  | -1.6769010 |   |            |            |            |
| H | 4.8193170  | 4.1992520  | -0.0646840 |   |            |            |            |

**Table S-17.** Geometric coordinates and thermally corrected MP2 energies for the A(THF)<sub>2</sub> mediated carbene generation of 1-chlorooctane (**5**).

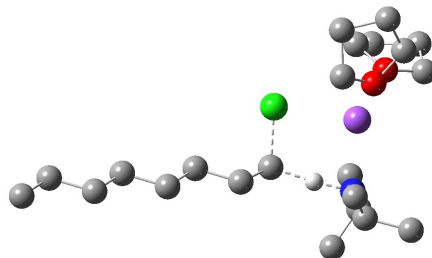

**G** = -1062425.683

**G<sub>MP2</sub>** = -1059776.791

| <b>Atom</b> | <b>X</b>   | <b>Y</b>   | <b>Z</b>   | <b>Atom</b> | <b>X</b>    | <b>Y</b>   | <b>Z</b>   |
|-------------|------------|------------|------------|-------------|-------------|------------|------------|
| C           | -8.4476500 | 0.7729700  | -1.0779880 | H           | -1.0870240  | -1.6722280 | -1.3643180 |
| H           | -8.1812380 | 1.7160680  | -1.5764400 | Cl          | -0.3090020  | 0.5930830  | -1.1655120 |
| H           | -8.5665300 | 0.0301740  | -1.8798370 | Na          | 1.9535950   | 0.0478970  | 0.2603960  |
| C           | -7.2957240 | 0.3443570  | -0.1598350 | N           | 1.2480950   | -2.0675260 | 0.9685990  |
| H           | -7.1789800 | 1.0862720  | 0.6445900  | C           | 1.6855440   | -3.2841400 | 0.2678240  |
| H           | -7.5621860 | -0.6004950 | 0.3374870  | H           | 2.5842960   | -3.6982180 | 0.7563920  |
| C           | -5.9576310 | 0.1737060  | -0.8905180 | C           | 0.6334240   | -4.4159550 | 0.2361370  |
| H           | -5.6911570 | 1.1198020  | -1.3850450 | H           | 1.0233220   | -5.3014680 | -0.2826030 |
| H           | -6.0773200 | -0.5648910 | -1.6973000 | H           | 0.3437980   | -4.7286670 | 1.2451930  |
| C           | -4.8045580 | -0.2601290 | 0.0240970  | H           | -0.2738280  | -4.0882700 | -0.2857540 |
| H           | -5.0699900 | -1.2084360 | 0.5160170  | C           | 2.1001740   | -2.9255340 | -1.1679900 |
| H           | -4.6879220 | 0.4767060  | 0.8334390  | H           | 2.9227950   | -2.1988760 | -1.1664170 |
| C           | -3.4663910 | -0.4219640 | -0.7096780 | H           | 2.4387880   | -3.8140810 | -1.7153210 |
| H           | -3.1976690 | 0.5267130  | -1.1927590 | H           | 1.2625010   | -2.4868320 | -1.7226190 |
| H           | -3.5803030 | -1.1577530 | -1.5199460 | C           | 0.9760260   | -2.2517960 | 2.3987810  |
| C           | -2.3106000 | -0.8648150 | 0.2042230  | H           | 0.1795410   | -3.0044410 | 2.5649280  |
| H           | -2.5792090 | -1.8309850 | 0.6677070  | C           | 2.1995700   | -2.7210600 | 3.2079950  |
| H           | -2.2154500 | -0.1552280 | 1.0402760  | H           | 1.9576510   | -2.7883640 | 4.2765740  |
| C           | -0.9532650 | -1.1176400 | -0.4236600 | H           | 2.5563420   | -3.7069470 | 2.8917690  |
| H           | 3.0286970  | -2.0095040 | 3.0884630  | C           | -9.7799050  | 0.9443950  | -0.3408790 |
| C           | 0.4531270  | -0.9334190 | 2.9897970  | H           | -10.5812830 | 1.2479190  | -1.0246010 |
| H           | -0.4132510 | -0.5657180 | 2.4306290  | H           | -10.0897590 | 0.0084530  | 0.1404800  |
| H           | 0.1487050  | -1.0671190 | 4.0352150  | H           | -9.7039340  | 1.7082460  | 0.4429960  |

|   |           |            |            |   |           |            |           |
|---|-----------|------------|------------|---|-----------|------------|-----------|
| H | 1.2315400 | -0.1574530 | 2.9689630  | H | 0.1788960 | -1.6495030 | 0.3759180 |
| O | 3.7255980 | 0.5595300  | -1.2094880 |   |           |            |           |
| C | 5.0724910 | 0.0282050  | -1.2040460 |   |           |            |           |
| H | 5.6745970 | 0.5996390  | -0.4889150 |   |           |            |           |
| H | 5.0244560 | -1.0134080 | -0.8650900 |   |           |            |           |
| C | 5.5880910 | 0.1390990  | -2.6467240 |   |           |            |           |
| C | 4.2875940 | 0.1626340  | -3.4664080 |   |           |            |           |
| C | 3.3622190 | 0.9601270  | -2.5516820 |   |           |            |           |
| H | 3.5255000 | 2.0419240  | -2.6625160 |   |           |            |           |
| H | 2.2981410 | 0.7485040  | -2.6839640 |   |           |            |           |
| H | 4.4065630 | 0.6241220  | -4.4511450 |   |           |            |           |
| H | 3.8985660 | -0.8522480 | -3.6059620 |   |           |            |           |
| H | 6.2530510 | -0.6876450 | -2.9125580 |   |           |            |           |
| H | 6.1416290 | 1.0748090  | -2.7868320 |   |           |            |           |
| O | 2.1414080 | 2.0355830  | 1.4777230  |   |           |            |           |
| C | 0.9742590 | 2.8450370  | 1.7324660  |   |           |            |           |
| H | 0.1300590 | 2.3711540  | 1.2265360  |   |           |            |           |
| H | 0.7774710 | 2.8768730  | 2.8139150  |   |           |            |           |
| C | 1.3382150 | 4.2236350  | 1.1892240  |   |           |            |           |
| C | 2.8232990 | 4.3303400  | 1.5782300  |   |           |            |           |
| C | 3.3176190 | 2.8754220  | 1.4636280  |   |           |            |           |
| H | 3.8430790 | 2.6806950  | 0.5226680  |   |           |            |           |
| H | 3.9726130 | 2.5904150  | 2.2957970  |   |           |            |           |
| H | 3.3884870 | 5.0116980  | 0.9354700  |   |           |            |           |
| H | 2.9196240 | 4.6880450  | 2.6094580  |   |           |            |           |
| H | 0.7242060 | 5.0231190  | 1.6144190  |   |           |            |           |
| H | 1.2173220 | 4.2390810  | 0.0999590  |   |           |            |           |

**Table S-18.** Geometric coordinates and thermally corrected MP2 energies for the A(THF)<sub>2</sub> mediated carbene generation from *n*-octyl trifluoromethanesulfonate (**13**).

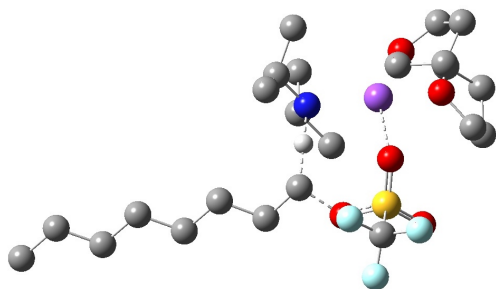

**G** = -1376904.647

**G<sub>MP2</sub>** = -1373454.118

| Atom | X          | Y          | Z          | Atom | X          | Y          | Z          |
|------|------------|------------|------------|------|------------|------------|------------|
| C    | 8.8212710  | -0.7585490 | 0.7084320  | O    | 0.4972270  | 1.6040020  | -1.2317030 |
| H    | 8.8227130  | -0.2016890 | 1.6564290  | S    | -0.9273280 | 2.1292790  | -0.9405480 |
| H    | 8.5761120  | -1.7983070 | 0.9682290  | O    | -1.6330080 | 2.3772960  | -2.1933350 |
| C    | 7.7263960  | -0.1949590 | -0.2065020 | O    | -1.6249660 | 1.3766530  | 0.1213140  |
| H    | 7.9722530  | 0.8458910  | -0.4656910 | Na   | -1.8852820 | -0.8942030 | 0.3324470  |
| H    | 7.7267400  | -0.7508500 | -1.1561440 | N    | 0.2952290  | -1.7279400 | 0.3136300  |
| C    | 6.3225330  | -0.2458500 | 0.4100140  | C    | 0.7370490  | -2.2276110 | 1.6281300  |
| H    | 6.3245670  | 0.3059150  | 1.3620240  | H    | 1.6678980  | -2.8166780 | 1.5184430  |
| H    | 6.0751740  | -1.2872870 | 0.6643870  | C    | 1.0583250  | -1.0634360 | 2.5844640  |
| C    | 5.2311750  | 0.3258090  | -0.5040810 | H    | 1.2922400  | -1.4399650 | 3.5876860  |
| H    | 5.2291920  | -0.2246440 | -1.4564150 | H    | 1.9089480  | -0.4709650 | 2.2378520  |
| H    | 5.4777350  | 1.3677460  | -0.7562400 | H    | 0.1975800  | -0.3865880 | 2.6749270  |
| C    | 3.8262200  | 0.2726390  | 0.1119360  | C    | -0.3027960 | -3.1409080 | 2.3175470  |
| H    | 3.8320920  | 0.8194280  | 1.0668010  | H    | -0.6043200 | -3.9760020 | 1.6797590  |
| H    | 3.5756870  | -0.7689390 | 0.3545950  | H    | 0.0939220  | -3.5569050 | 3.2544770  |
| C    | 2.7459350  | 0.8622670  | -0.8112710 | H    | -1.2055790 | -2.5663680 | 2.5688460  |
| H    | 3.0290440  | 1.8958720  | -1.0718340 | C    | 0.7761760  | -2.5295470 | -0.8203160 |
| C    | 1.3756350  | 0.7894880  | -0.1574680 | H    | 1.8875130  | -2.5125190 | -0.8489660 |
| H    | 1.3536200  | 1.4643450  | 0.7090870  | C    | 0.3808940  | -4.0179720 | -0.8023700 |
| H    | 0.7922900  | -4.5467310 | 0.0629560  | H    | -4.6506000 | 1.6878760  | 2.1134710  |
| H    | -0.7123420 | -4.1302120 | -0.7788240 | H    | -4.7048740 | 1.7724180  | 3.8866900  |
| H    | 0.7549500  | -4.5230450 | -1.7028650 | C    | -0.6182710 | 3.8043350  | -0.1728270 |

|   |            |            |            |   |            |            |            |
|---|------------|------------|------------|---|------------|------------|------------|
| C | 0.2839140  | -1.8988860 | -2.1324380 | F | 0.0390280  | 3.6675450  | 0.9851320  |
| H | 0.5632750  | -0.8447350 | -2.2064710 | F | -1.7933410 | 4.3955920  | 0.0629510  |
| H | 0.7007410  | -2.4248920 | -3.0002540 | F | 0.1004300  | 4.5625610  | -0.9986410 |
| H | -0.8121640 | -1.9614450 | -2.2007720 | C | 10.2191590 | -0.7048500 | 0.0834260  |
| O | -3.5892240 | -1.3906900 | -1.2130310 | H | 10.9779290 | -1.1138360 | 0.7606430  |
| C | -4.0645290 | -0.3811520 | -2.1351920 | H | 10.2588510 | -1.2820710 | -0.8486960 |
| H | -5.0684460 | -0.0529830 | -1.8275850 | H | 10.5071080 | 0.3265250  | -0.1554330 |
| H | -3.3819570 | 0.4694970  | -2.0853120 | H | 2.7396120  | 0.2978480  | -1.7547030 |
| C | -4.1003260 | -1.0799260 | -3.4903900 | H | 0.7945500  | -0.5430700 | 0.1015490  |
| C | -4.5694410 | -2.4915120 | -3.1008830 |   |            |            |            |
| C | -3.9054740 | -2.7064770 | -1.7297040 |   |            |            |            |
| H | -4.5606910 | -3.2210100 | -1.0171960 |   |            |            |            |
| H | -2.9681560 | -3.2685560 | -1.8079210 |   |            |            |            |
| H | -5.6612080 | -2.5162470 | -3.0077060 |   |            |            |            |
| H | -4.2780150 | -3.2583410 | -3.8243280 |   |            |            |            |
| H | -3.0944630 | -1.1087290 | -3.9241630 |   |            |            |            |
| H | -4.7673010 | -0.5851350 | -4.2024350 |   |            |            |            |
| O | -3.2524030 | -0.6871990 | 2.2146870  |   |            |            |            |
| C | -3.1374530 | 0.4730730  | 3.0627420  |   |            |            |            |
| H | -2.8568760 | 0.1602720  | 4.0789480  |   |            |            |            |
| H | -2.3478390 | 1.1043610  | 2.6495450  |   |            |            |            |
| C | -4.5244630 | 1.1091160  | 3.0355510  |   |            |            |            |
| C | -5.4349670 | -0.1312820 | 3.0327050  |   |            |            |            |
| C | -4.6201030 | -1.1587630 | 2.2241420  |   |            |            |            |
| H | -4.6499360 | -2.1603610 | 2.6689310  |   |            |            |            |
| H | -4.9453710 | -1.2287450 | 1.1806070  |   |            |            |            |
| H | -5.5933570 | -0.4872980 | 4.0568500  |   |            |            |            |
| H | -6.4173080 | 0.0584370  | 2.5903540  |   |            |            |            |

**Table S-19.** Geometric coordinates and thermally corrected MP2 energies for the A(THF)<sub>2</sub> mediated substitution of *n*-octyl trifluoromethanesulfonate (**13**).

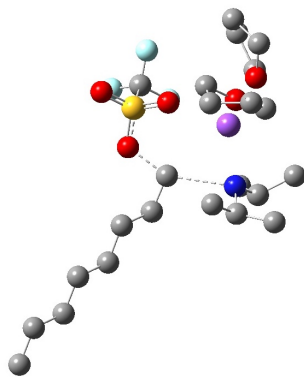

**G** = -1376903.394

**G<sub>MP2</sub>** = -1373453.623

| Atom | X          | Y          | Z          | Atom | X          | Y          | Z          |
|------|------------|------------|------------|------|------------|------------|------------|
| C    | 8.5673940  | -0.0631130 | -1.0206400 | H    | 0.7893100  | -0.2859510 | -0.2007950 |
| H    | 8.3975040  | -0.9975750 | -1.5742350 | H    | 0.2805090  | 0.7107150  | 1.2422090  |
| H    | 8.4653280  | 0.7477380  | -1.7559910 | C    | 9.9895710  | -0.0585570 | -0.4507280 |
| C    | 7.4834660  | 0.0909150  | 0.0539710  | H    | 10.7393540 | -0.1661650 | -1.2429770 |
| H    | 7.5842610  | -0.7215740 | 0.7891880  | H    | 10.1999020 | 0.8772340  | 0.0818630  |
| H    | 7.6549290  | 1.0249940  | 0.6096820  | H    | 10.1351550 | -0.8818920 | 0.2595490  |
| C    | 6.0571050  | 0.0914320  | -0.5106100 | O    | 1.0468040  | 1.8838900  | -0.4693790 |
| H    | 5.8872960  | -0.8408840 | -1.0694010 | S    | -0.2612330 | 2.1302590  | -1.2412210 |
| H    | 5.9567010  | 0.9062460  | -1.2427300 | O    | -0.0442530 | 2.7417380  | -2.5452060 |
| C    | 4.9723150  | 0.2414860  | 0.5635140  | O    | -1.1808750 | 0.9714820  | -1.1546050 |
| H    | 5.1476500  | 1.1687840  | 1.1289780  | C    | -1.0895660 | 3.4260740  | -0.1876720 |
| H    | 5.0622730  | -0.5798770 | 1.2899440  | F    | -2.2890560 | 3.7278100  | -0.7028300 |
| C    | 3.5505180  | 0.2614310  | -0.0119070 | F    | -0.3512880 | 4.5307790  | -0.1219980 |
| H    | 3.3735870  | -0.6648270 | -0.5763730 | F    | -1.2718440 | 2.9495000  | 1.0590570  |
| H    | 3.4523140  | 1.0865480  | -0.7268120 | N    | -0.1102370 | -1.7196980 | 1.6072150  |
| C    | 2.4761130  | 0.4048830  | 1.0760810  | Na   | -1.8159930 | -0.8756050 | 0.2432740  |
| H    | 2.6480510  | 1.3160000  | 1.6637100  | O    | -3.8463670 | 0.0526980  | 0.9916510  |
| H    | 2.5446960  | -0.4367450 | 1.7779480  | C    | -1.7244590 | -2.1762660 | 3.4894310  |
| C    | 1.0638140  | 0.4060600  | 0.5729390  | H    | -1.8719550 | -3.2091580 | 3.1642130  |
| H    | -3.0580480 | 1.4291270  | 2.2911110  | C    | -4.0431550 | 1.1292590  | 1.9287590  |



|   |            |            |            |   |            |            |            |
|---|------------|------------|------------|---|------------|------------|------------|
| C | -4.7898480 | 2.2491570  | 1.1619380  | H | -4.6318700 | 0.7609450  | 2.7794740  |
| C | -5.1122990 | 1.6093940  | -0.2112830 | H | -1.8528990 | -2.1408130 | 4.5814510  |
| C | -4.9415840 | 0.1148710  | 0.0643510  | H | -2.5258450 | -1.5722610 | 3.0401210  |
| H | -5.8431450 | -0.3149440 | 0.5287620  | C | 0.6913860  | -2.8856070 | 1.2570920  |
| H | -4.6645870 | -0.4861610 | -0.8040980 | H | 1.6983850  | -2.8304970 | 1.7377600  |
| H | -6.1131050 | 1.8604490  | -0.5752200 | C | 0.1194760  | -4.2591250 | 1.6969430  |
| H | -4.3819800 | 1.9322550  | -0.9592730 | H | -0.0055270 | -4.3245640 | 2.7817170  |
| H | -4.1701840 | 3.1410370  | 1.0469580  | H | -0.8628590 | -4.4318000 | 1.2340680  |
| H | -5.7001590 | 2.5403180  | 1.6949670  | H | 0.7897460  | -5.0757920 | 1.3952910  |
| O | -2.7364550 | -2.0314410 | -1.5945550 | C | 0.9393800  | -2.9579180 | -0.2597210 |
| C | -2.5053810 | -1.6297620 | -2.9624980 | H | 1.5130900  | -2.1042450 | -0.6330940 |
| H | -3.4369180 | -1.2290100 | -3.3895590 | H | 1.4988570  | -3.8632490 | -0.5246920 |
| H | -1.7562360 | -0.8360980 | -2.9484810 | H | -0.0158190 | -2.9854700 | -0.8034620 |
| C | -2.0782160 | -2.9102680 | -3.6729660 |   |            |            |            |
| C | -2.9865700 | -3.9552300 | -3.0018190 |   |            |            |            |
| C | -3.1149060 | -3.4295880 | -1.5598410 |   |            |            |            |
| H | -4.1359640 | -3.5138050 | -1.1699590 |   |            |            |            |
| H | -2.4351860 | -3.9372010 | -0.8672400 |   |            |            |            |
| H | -3.9664520 | -3.9755240 | -3.4920430 |   |            |            |            |
| H | -2.5750020 | -4.9679180 | -3.0360910 |   |            |            |            |
| H | -1.0230010 | -3.1216830 | -3.4658310 |   |            |            |            |
| H | -2.2122980 | -2.8575800 | -4.7575040 |   |            |            |            |
| C | -0.3391260 | -1.6305500 | 3.0528400  |   |            |            |            |
| H | 0.4232110  | -2.2166610 | 3.6039210  |   |            |            |            |
| C | -0.2177660 | -0.1889060 | 3.5852730  |   |            |            |            |
| H | -0.4449730 | -0.1402090 | 4.6577350  |   |            |            |            |
| H | 0.7902220  | 0.2129240  | 3.4395860  |   |            |            |            |
| H | -0.9281430 | 0.4800600  | 3.0766660  |   |            |            |            |

**Table S-20.** Geometric coordinates and thermally corrected MP2 energies for the A(THF)<sub>3</sub> mediated substitution of *n*-octyl trifluoromethanesulfonate (**13**).

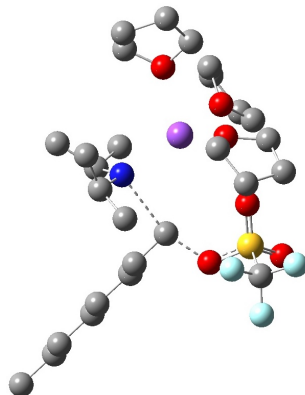

**G** = -1522627.836

**G<sub>MP2</sub>** = -1518767.013

| Atom | X          | Y          | Z          | Atom | X           | Y          | Z          |
|------|------------|------------|------------|------|-------------|------------|------------|
| C    | -8.7474590 | -1.6202950 | 0.5833520  | H    | -2.5534130  | -0.8099720 | -1.6435250 |
| H    | -8.4333630 | -2.4375120 | 1.2483430  | C    | -1.4075890  | 0.4353090  | -0.3941400 |
| H    | -8.9168190 | -0.7493780 | 1.2325380  | H    | -1.1061830  | -0.0442370 | 0.5206360  |
| C    | -7.6126440 | -1.3047840 | -0.3995180 | H    | -0.6130740  | 0.8162660  | -1.0073910 |
| H    | -7.4440120 | -2.1769240 | -1.0490830 | C    | -10.0595310 | -2.0024920 | -0.1093680 |
| H    | -7.9279410 | -0.4878040 | -1.0658030 | H    | -10.8484290 | -2.2223720 | 0.6192150  |
| C    | -6.2950180 | -0.9203320 | 0.2853520  | H    | -10.4186570 | -1.1906860 | -0.7540400 |
| H    | -5.9818780 | -1.7361710 | 0.9538250  | H    | -9.9310430  | -2.8914360 | -0.7394040 |
| H    | -6.4626730 | -0.0460870 | 0.9315660  | O    | -1.8806820  | 2.0184020  | 0.3718400  |
| C    | -5.1607680 | -0.6106340 | -0.6999230 | S    | -0.7374130  | 2.8998110  | 0.9035760  |
| H    | -5.4755340 | 0.2030920  | -1.3702300 | O    | -1.1407840  | 3.7025740  | 2.0531020  |
| H    | -4.9891270 | -1.4863890 | -1.3435900 | O    | 0.5426670   | 2.1653320  | 0.9626580  |
| C    | -3.8465350 | -0.2201830 | -0.0128480 | C    | -0.5088160  | 4.0998470  | -0.5044090 |
| H    | -3.5271630 | -1.0346200 | 0.6528050  | F    | 0.4799780   | 4.9589230  | -0.2174970 |
| H    | -4.0057820 | 0.6602420  | 0.6206000  | F    | -1.6268810  | 4.7880990  | -0.7312750 |
| C    | -2.7226420 | 0.0743100  | -1.0171810 | F    | -0.1785080  | 3.4317870  | -1.6256600 |
| H    | -3.0215290 | 0.8845390  | -1.6949130 | N    | 0.0311680   | -1.6145310 | -1.1292820 |
| C    | 0.0666990  | -1.6456440 | -2.5924860 | H    | 3.9153020   | 3.2686160  | -2.9182040 |
| H    | -0.8417130 | -2.1342130 | -3.0027580 | H    | 4.5994260   | 3.8921450  | -0.6985230 |
| C    | 0.1047430  | -0.2319670 | -3.2087590 | H    | 2.8619280   | 4.0369910  | -0.4050880 |

|    |            |            |            |   |            |            |            |
|----|------------|------------|------------|---|------------|------------|------------|
| H  | 0.3207280  | -0.2747660 | -4.2836150 | O | 3.7262630  | -2.2847320 | 0.1065100  |
| H  | -0.8423440 | 0.3026900  | -3.0906790 | C | 5.0817180  | -1.8468890 | 0.3143990  |
| H  | 0.8934180  | 0.3720110  | -2.7383380 | H | 5.0950450  | -0.7716880 | 0.1275810  |
| C  | 1.2833860  | -2.4187680 | -3.1692050 | H | 5.3665260  | -2.0283900 | 1.3603050  |
| H  | 2.2141140  | -1.9080010 | -2.8821850 | C | 5.9673680  | -2.6667860 | -0.6587140 |
| H  | 1.3378170  | -3.4416320 | -2.7911390 | C | 4.9668410  | -3.6104790 | -1.3661510 |
| H  | 1.2510440  | -2.4657520 | -4.2675500 | C | 3.7834340  | -3.6247900 | -0.3987400 |
| C  | -0.7458560 | -2.7082190 | -0.5538480 | H | 2.8196780  | -3.8391440 | -0.8627090 |
| H  | -1.8375050 | -2.5596360 | -0.7419250 | H | 3.9520160  | -4.3320840 | 0.4297570  |
| C  | -0.4804970 | -4.1445980 | -1.0745810 | H | 4.6487770  | -3.1913980 | -2.3264600 |
| H  | -0.6529980 | -4.2364540 | -2.1510580 | H | 5.3771770  | -4.6081200 | -1.5491040 |
| H  | 0.5505540  | -4.4609810 | -0.8647430 | H | 6.7220860  | -3.2352320 | -0.1058560 |
| H  | -1.1550810 | -4.8539230 | -0.5761450 | H | 6.4965140  | -2.0266060 | -1.3704470 |
| C  | -0.5632930 | -2.7463900 | 0.9734500  | O | 2.1797310  | -0.6143490 | 2.4768380  |
| H  | -0.7353050 | -1.7712580 | 1.4416290  | C | 1.7140820  | 0.3252330  | 3.4623430  |
| H  | -1.2503820 | -3.4641010 | 1.4392200  | H | 2.5836670  | 0.8144590  | 3.9287610  |
| H  | 0.4609360  | -3.0577920 | 1.2226440  | H | 1.1174830  | 1.0763440  | 2.9457130  |
| Na | 1.8590660  | -0.7345230 | 0.0979510  | C | 0.9458630  | -0.5239130 | 4.4890060  |
| O  | 3.3821500  | 0.9652200  | -0.6226390 | C | 1.5893210  | -1.9329660 | 4.3556580  |
| C  | 3.7120070  | 2.1049540  | 0.2020720  | C | 2.6201590  | -1.7568290 | 3.2230800  |
| H  | 2.9855490  | 2.1332130  | 1.0135590  | H | 3.6233620  | -1.5571780 | 3.6315010  |
| H  | 4.7196650  | 1.9630010  | 0.6178630  | H | 2.6862670  | -2.5971630 | 2.5303710  |
| C  | 3.6495080  | 3.3484230  | -0.7174200 | H | 2.0679210  | -2.2661540 | 5.2816190  |
| C  | 3.3609900  | 2.7637040  | -2.1211910 | H | 0.8371230  | -2.6789430 | 4.0836600  |
| C  | 3.7629010  | 1.2970000  | -1.9648140 | H | -0.1183060 | -0.5597950 | 4.2378180  |
| H  | 3.2439510  | 0.6100860  | -2.6374730 | H | 1.0333280  | -0.1123570 | 5.4988390  |
| H  | 4.8499650  | 1.1634130  | -2.0886730 |   |            |            |            |
| H  | 2.2932780  | 2.8340020  | -2.3485010 |   |            |            |            |

**Table S-21.** Geometric coordinates and thermally corrected MP2 energies for the A(THF)<sub>3</sub> mediated anti elimination of 1-bromo-4-(*tert*-butyl)cyclohexane (*cis*-**17**).

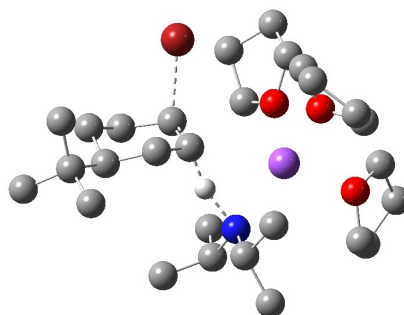

**G** = -2581668.122

**G<sub>MP2</sub>** = -2577781.99

| Atom | X          | Y          | Z          | Atom | X          | Y          | Z          |
|------|------------|------------|------------|------|------------|------------|------------|
| Na   | 1.6717260  | -0.3698210 | 0.1282320  | H    | 1.8086820  | -4.3788110 | 0.5675420  |
| N    | 0.2685800  | -2.2492900 | -0.4046290 | C    | 0.1200510  | -2.6944190 | 2.0100850  |
| C    | 0.2449810  | -2.7534650 | -1.7827610 | H    | -0.4441550 | -1.7688950 | 2.1550560  |
| H    | 0.9442510  | -3.6041190 | -1.8860100 | H    | -0.2095290 | -3.4106070 | 2.7731160  |
| C    | -1.1282470 | -3.2661630 | -2.2730970 | H    | 1.1829830  | -2.4790930 | 2.1904480  |
| H    | -1.8672650 | -2.4559920 | -2.2854040 | O    | 1.7567540  | 0.7448230  | 2.2293750  |
| H    | -1.0574010 | -3.6752190 | -3.2895360 | C    | 2.5423750  | 0.1875040  | 3.2937770  |
| H    | -1.5179050 | -4.0595840 | -1.6262710 | H    | 2.9396950  | -0.7684720 | 2.9453830  |
| C    | 0.7621650  | -1.6742300 | -2.7458440 | H    | 3.3867410  | 0.8604300  | 3.5084040  |
| H    | 1.7778280  | -1.3563780 | -2.4733190 | C    | 1.5932110  | 0.0846370  | 4.5070750  |
| H    | 0.7975270  | -2.0469310 | -3.7770390 | C    | 0.4317930  | 1.0540430  | 4.1504080  |
| H    | 0.1141580  | -0.7898430 | -2.7384800 | C    | 0.9053550  | 1.7257390  | 2.8549480  |
| C    | -0.0746670 | -3.2680660 | 0.5985050  | H    | 0.1100560  | 1.9873150  | 2.1536420  |
| H    | -1.1420550 | -3.5603290 | 0.5245780  | H    | 1.4999440  | 2.6277090  | 3.0683680  |
| C    | 0.7313010  | -4.5804930 | 0.4957520  | H    | -0.4932410 | 0.4987730  | 3.9692950  |
| H    | 0.4603810  | -5.2588030 | 1.3147150  | H    | 0.2319860  | 1.7859420  | 4.9384260  |
| H    | 0.5509880  | -5.1162170 | -0.4416270 | H    | 2.1046890  | 0.3685330  | 5.4318500  |
| H    | 1.2248030  | -0.9372830 | 4.6324110  | C    | -3.8727920 | -0.5744610 | -0.4313800 |
| O    | 3.9285410  | -1.0607460 | 0.1741380  | C    | -2.8265060 | -0.4167000 | 0.6947420  |
| C    | 4.2690680  | -2.3824320 | -0.2855310 | H    | -3.1452230 | 0.3921550  | 1.3708330  |
| H    | 4.8195090  | -2.9200260 | 0.5014440  | H    | -2.7784600 | -1.3304720 | 1.2970940  |

|   |            |            |            |    |            |            |            |
|---|------------|------------|------------|----|------------|------------|------------|
| H | 3.3313770  | -2.9054360 | -0.4860470 | H  | -3.5574300 | -1.4366110 | -1.0418510 |
| C | 5.1460290  | -2.1477190 | -1.5121630 | C  | -5.3169970 | -0.9246810 | 0.0738500  |
| C | 5.9744090  | -0.9265860 | -1.0733200 | C  | -5.2665400 | -2.1475190 | 1.0160960  |
| C | 5.0014890  | -0.1486780 | -0.1627630 | H  | -4.7704670 | -1.9172590 | 1.9643550  |
| H | 5.4840910  | 0.1957290  | 0.7598220  | H  | -6.2821150 | -2.4882700 | 1.2530310  |
| H | 4.5431410  | 0.7097550  | -0.6625210 | H  | -4.7333510 | -2.9872590 | 0.5521970  |
| H | 6.8549020  | -1.2502200 | -0.5072960 | C  | -6.2079730 | -1.3055730 | -1.1289860 |
| H | 6.3249820  | -0.3228330 | -1.9154910 | H  | -7.2039140 | -1.6125540 | -0.7865320 |
| H | 4.5201180  | -1.9033690 | -2.3782850 | H  | -6.3468760 | -0.4712910 | -1.8243170 |
| H | 5.7617640  | -3.0152070 | -1.7678620 | H  | -5.7764120 | -2.1438960 | -1.6905220 |
| O | 2.1781820  | 1.6733840  | -1.0837610 | C  | -5.9759190 | 0.2500820  | 0.8265360  |
| C | 2.2632220  | 2.8924310  | -0.2868200 | H  | -6.1247350 | 1.1200550  | 0.1778200  |
| H | 1.3324550  | 2.9925530  | 0.2773300  | H  | -6.9611040 | -0.0483150 | 1.2067670  |
| H | 3.1086370  | 2.7871470  | 0.3996700  | H  | -5.3759080 | 0.5728250  | 1.6845960  |
| C | 2.4066920  | 4.0377060  | -1.2887120 | H  | -4.0653110 | 1.5691050  | -0.7588990 |
| C | 1.6014540  | 3.5002260  | -2.4803030 | H  | -4.5412930 | 0.6014030  | -2.1565930 |
| C | 2.0012680  | 2.0253980  | -2.4766740 | H  | -2.3761060 | 1.7960000  | -2.5267370 |
| H | 1.2451500  | 1.3621220  | -2.9053990 | H  | -2.1789170 | 0.0446640  | -2.6151340 |
| H | 2.9501200  | 1.8617090  | -3.0078200 | H  | -0.3477650 | 1.1310940  | -1.2276970 |
| H | 0.5312250  | 3.6022570  | -2.2688630 | H  | -0.7521630 | 0.1363480  | 1.0072210  |
| H | 1.8304080  | 3.9960380  | -3.4285550 | Br | -1.5308560 | 3.0566330  | 0.0473100  |
| H | 3.4568710  | 4.1954310  | -1.5652490 | H  | -0.7514870 | -1.1703430 | -0.2522810 |
| H | 2.0091720  | 4.9763010  | -0.8920770 | C  | -1.4227190 | -0.0960870 | 0.1705920  |
| C | -1.3441530 | 0.8961960  | -0.8650850 |    |            |            |            |
| C | -2.4154490 | 0.8785300  | -1.9320000 |    |            |            |            |
| C | -3.8153940 | 0.6730750  | -1.3392120 |    |            |            |            |

**Table S-22.** Geometric coordinates and thermally corrected MP2 energies for the A(THF)<sub>3</sub> mediated carbene generation of 1-bromo-4-(*tert*-butyl)cyclohexane (*trans*-17).

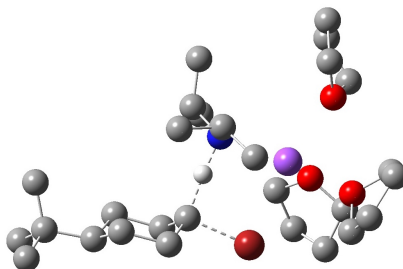

**G** = -2581671.815

**G<sub>MP2</sub>** = -2577789.192

| Atom | X          | Y          | Z          | Atom | X          | Y          | Z          |
|------|------------|------------|------------|------|------------|------------|------------|
| Na   | 1.6444110  | 0.0128870  | -0.0953500 | H    | 1.0087910  | 3.7297990  | -1.1380300 |
| N    | -0.2047820 | 1.5665580  | 0.1779880  | C    | -0.3960620 | 1.6009190  | -2.2617030 |
| C    | -0.1831900 | 2.2933660  | 1.4567300  | H    | -0.7626220 | 0.5728730  | -2.2045560 |
| H    | 0.4795450  | 3.1736700  | 1.3695190  | H    | -0.8756950 | 2.0842180  | -3.1227150 |
| C    | -1.5484630 | 2.8294080  | 1.9451640  | H    | 0.6861050  | 1.5662570  | -2.4544910 |
| H    | -1.4238540 | 3.4568070  | 2.8377350  | O    | 2.3592510  | -1.4063440 | -1.9873960 |
| H    | -2.0459590 | 3.4372030  | 1.1815630  | C    | 1.3346400  | -1.7960820 | -2.9376620 |
| H    | -2.2205650 | 2.0058420  | 2.2070730  | H    | 0.3601930  | -1.6279430 | -2.4688620 |
| C    | 0.4301310  | 1.4065280  | 2.5513230  | H    | 1.4229380  | -1.1594080 | -3.8243500 |
| H    | 1.4618420  | 1.1241170  | 2.3067440  | C    | 1.5590730  | -3.2840820 | -3.2284160 |
| H    | 0.4500950  | 1.9319150  | 3.5147670  | C    | 2.2186440  | -3.7682560 | -1.9282130 |
| H    | -0.1465190 | 0.4836320  | 2.6801960  | C    | 3.1018840  | -2.5749890 | -1.5693630 |
| C    | -0.6842730 | 2.3637690  | -0.9601220 | H    | 3.3034040  | -2.4733600 | -0.4999010 |
| H    | -1.7863600 | 2.4978140  | -0.9135680 | H    | 4.0579270  | -2.6053940 | -2.1132920 |
| C    | -0.0865590 | 3.7779310  | -1.0783600 | H    | 1.4577740  | -3.9119770 | -1.1542640 |
| H    | -0.4516240 | 4.2677760  | -1.9899420 | H    | 2.7878070  | -4.6956370 | -2.0460210 |
| H    | -0.3498670 | 4.4230000  | -0.2342660 | H    | 2.2382830  | -3.4190050 | -4.0790290 |
| H    | 0.6229930  | -3.8027140 | -3.4556060 | C    | -6.9677050 | -0.3327250 | -1.3690970 |
| O    | 3.1569770  | -1.0341460 | 1.5756310  | H    | -7.0411370 | -1.4272640 | -1.3323820 |

|    |            |            |            |   |            |            |            |
|----|------------|------------|------------|---|------------|------------|------------|
| C  | 4.4816970  | -0.6120090 | 1.9200350  | H | -7.9876590 | 0.0665570  | -1.4310160 |
| H  | 5.1858630  | -1.4427080 | 1.7516390  | H | -6.4558930 | -0.0614460 | -2.2981760 |
| H  | 4.7378110  | 0.2140740  | 1.2557140  | C | -6.1117030 | 1.7516830  | -0.2706440 |
| C  | 4.4101470  | -0.2477200 | 3.4130160  | H | -5.5083420 | 2.0238730  | -1.1436850 |
| C  | 3.2420090  | -1.1248160 | 3.9458080  | H | -7.1008130 | 2.2090070  | -0.3999910 |
| C  | 2.7041890  | -1.8305520 | 2.6853050  | H | -5.6520570 | 2.2106440  | 0.6114530  |
| H  | 3.1219260  | -2.8443110 | 2.5884780  | H | -3.8564100 | 0.9942070  | 1.2756790  |
| H  | 1.6181140  | -1.8896020 | 2.6141710  | H | -4.6993350 | -0.2283460 | 2.2208760  |
| H  | 3.5726260  | -1.8494170 | 4.6960660  | H | -3.0365800 | -1.9355040 | 1.6448710  |
| H  | 2.4666320  | -0.5044370 | 4.4035160  | H | -2.2711320 | -0.5463310 | 2.4182510  |
| H  | 4.1799420  | 0.8150080  | 3.5366100  | O | 3.5902400  | 1.4318720  | -0.5841470 |
| H  | 5.3568820  | -0.4443390 | 3.9254160  | C | 4.3024470  | 1.3424780  | -1.8284350 |
| Br | -0.2679020 | -2.0318960 | 0.5261310  | H | 5.3748790  | 1.1758700  | -1.6359470 |
| C  | -1.8861710 | -0.6621750 | 0.2798550  | H | 3.8957020  | 0.4850140  | -2.3674270 |
| C  | -2.7728340 | -0.8740150 | 1.4981490  | C | 4.0654690  | 2.6974960  | -2.4923870 |
| C  | -4.0880920 | -0.0764090 | 1.3239400  | C | 4.1261300  | 3.6648050  | -1.2910520 |
| C  | -4.8600670 | -0.4898890 | 0.0533580  | C | 3.7310950  | 2.7777930  | -0.0846590 |
| C  | -3.9142600 | -0.3543950 | -1.1583560 | H | 4.5027470  | 2.7965990  | 0.6972810  |
| C  | -2.6179990 | -1.1697920 | -0.9552300 | H | 2.7731410  | 3.0532540  | 0.3624750  |
| H  | -1.9944480 | -1.0906840 | -1.8549350 | H | 5.1392550  | 4.0600870  | -1.1617980 |
| H  | -2.8978000 | -2.2338760 | -0.8638900 | H | 3.4519250  | 4.5172770  | -1.4115890 |
| H  | -3.6537410 | 0.7008930  | -1.3146910 | H | 3.0710640  | 2.7143950  | -2.9511470 |
| H  | -4.4005240 | -0.7023260 | -2.0767430 | H | 4.8048640  | 2.9292600  | -3.2651680 |
| H  | -5.0910790 | -1.5638440 | 0.1542140  | H | -1.0488050 | 0.5550600  | 0.2419360  |
| C  | -6.2473200 | 0.2223400  | -0.1203690 |   |            |            |            |
| C  | -7.1448000 | -0.0768850 | 1.1007060  |   |            |            |            |
| H  | -8.1559830 | 0.3161280  | 0.9379680  |   |            |            |            |
| H  | -7.2321640 | -1.1572330 | 1.2739550  |   |            |            |            |
| H  | -6.7626680 | 0.3802690  | 2.0190380  |   |            |            |            |

**Table S-23.** Geometric coordinates and thermally corrected MP2 energies for the A(THF)<sub>3</sub> mediated carbene generation of 1-bromo-4-(*tert*-butyl)cyclohexane (*cis*-**17**).

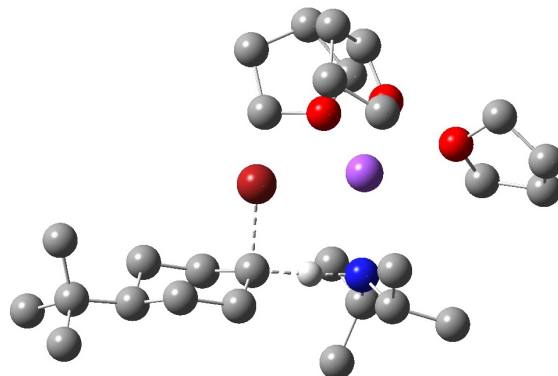

**G** = -2581674.681

**G<sub>MP2</sub>** = -2577790.712

| Atom | X          | Y          | Z          | Atom | X          | Y          | Z          |
|------|------------|------------|------------|------|------------|------------|------------|
| Na   | 1.6448180  | -0.0185260 | -0.0202930 | H    | -7.9672780 | -0.4910620 | 1.2271820  |
| Br   | -1.0672330 | -0.9470300 | -0.5182780 | H    | -6.4506170 | -0.6422220 | 2.1179910  |
| C    | -1.7867530 | 1.0142620  | 0.0396580  | H    | -7.0507710 | 0.9610340  | 1.6620750  |
| C    | -2.7197750 | 1.4409180  | -1.0822670 | C    | -6.0571120 | -1.6491390 | -0.4130640 |
| C    | -4.0336170 | 0.6484660  | -1.2337320 | H    | -5.4866360 | -2.2123930 | 0.3335600  |
| C    | -4.8173050 | 0.5611110  | 0.0940400  | H    | -7.0447870 | -2.1201240 | -0.4965730 |
| C    | -3.8888140 | -0.0194650 | 1.1825490  | H    | -5.5530810 | -1.7669880 | -1.3785460 |
| C    | -2.5789000 | 0.7828620  | 1.3173330  | H    | -3.7846010 | -0.3602520 | -1.5865730 |
| H    | -1.9483130 | 0.3335270  | 2.0953900  | H    | -4.6425500 | 1.1188630  | -2.0151680 |
| H    | -2.8275870 | 1.7959100  | 1.6816110  | H    | -2.9687170 | 2.4906750  | -0.8429120 |
| H    | -3.6296290 | -1.0561250 | 0.9341900  | H    | -2.1933050 | 1.4738710  | -2.0434710 |
| H    | -4.3952890 | -0.0401680 | 2.1551270  | N    | 0.7130270  | 2.2191420  | 0.0966250  |
| H    | -5.0536380 | 1.5974600  | 0.3938740  | C    | 0.8188480  | 3.0569570  | 1.2999680  |
| C    | -6.2046590 | -0.1642740 | -0.0219630 | H    | 1.7910330  | 3.5834450  | 1.3096510  |
| C    | -7.0795670 | 0.5407250  | -1.0814390 | C    | -0.2686790 | 4.1488360  | 1.4299620  |
| H    | -6.6793270 | 0.4230710  | -2.0934840 | H    | -0.1131950 | 4.7514910  | 2.3343450  |
| H    | -8.0935750 | 0.1218130  | -1.0804850 | H    | -0.2638690 | 4.8327080  | 0.5742140  |



|   |            |            |            |   |            |            |            |
|---|------------|------------|------------|---|------------|------------|------------|
| H | -7.1639950 | 1.6156760  | -0.8758740 | H | 3.1062530  | -1.0908660 | 3.5468740  |
| C | -6.9549600 | -0.0795390 | 1.3256880  | C | 2.5807490  | -3.1934420 | 3.2156220  |
| H | 1.6105200  | 1.4230400  | 2.5180680  | H | -1.2673470 | 3.7004840  | 1.4907950  |
| H | 0.9172830  | 2.7586530  | 3.4618140  | C | 0.8008300  | 2.1618140  | 2.5482110  |
| H | -0.1452220 | 1.6144710  | 2.6229740  | C | 1.0276260  | -3.2331870 | 3.1345470  |
| C | 0.7755330  | 2.9663630  | -1.1689050 | C | 0.6516400  | -1.8104720 | 2.6912000  |
| H | -0.1389830 | 3.5767570  | -1.3165570 | H | -0.2011270 | -1.7448980 | 2.0146930  |
| C | 1.9675350  | 3.9325960  | -1.2938990 | H | 0.4843320  | -1.1520110 | 3.5569390  |
| H | 1.9832260  | 4.3952840  | -2.2890000 | H | 0.6965260  | -3.9621830 | 2.3882610  |
| H | 1.9337050  | 4.7421680  | -0.5576130 | H | 0.5614070  | -3.5000160 | 4.0875690  |
| H | 2.9135860  | 3.3910620  | -1.1576020 | H | 2.9502590  | -3.3530990 | 4.2331380  |
| C | 0.8252780  | 1.9674880  | -2.3366550 | H | 3.0255670  | -3.9655950 | 2.5803640  |
| H | 0.0548350  | 1.1973130  | -2.2326020 | O | 4.0716310  | 0.3043700  | 0.2104820  |
| H | 0.6813530  | 2.4728440  | -3.3002550 | C | 5.0427490  | -0.0609480 | -0.7807650 |
| H | 1.8056290  | 1.4677830  | -2.3704700 | H | 5.8543880  | -0.6452230 | -0.3167610 |
| O | 2.3058500  | -1.7131180 | -1.7195870 | H | 4.5278420  | -0.6811520 | -1.5163190 |
| C | 1.7551970  | -1.7811420 | -3.0480210 | C | 5.5625120  | 1.2734010  | -1.3110030 |
| H | 1.2381300  | -0.8383430 | -3.2368370 | C | 5.6204620  | 2.1274120  | -0.0278500 |
| H | 2.5689530  | -1.8978620 | -3.7810630 | C | 4.5351660  | 1.4984700  | 0.8790330  |
| C | 0.8397260  | -3.0013300 | -3.0262610 | H | 4.9366160  | 1.2294450  | 1.8649930  |
| C | 1.6390330  | -3.9836450 | -2.1498020 | H | 3.6637150  | 2.1423370  | 1.0169940  |
| C | 2.4305030  | -3.0569870 | -1.2003920 | H | 6.6070540  | 2.0501360  | 0.4416340  |
| H | 2.0327210  | -3.0456330 | -0.1815680 | H | 5.4288870  | 3.1863020  | -0.2229310 |
| H | 3.4936080  | -3.3281560 | -1.1554040 | H | 4.8437950  | 1.6937500  | -2.0230010 |
| H | 0.9939610  | -4.6779140 | -1.6034490 | H | 6.5318280  | 1.1865810  | -1.8117320 |
| H | 2.3242080  | -4.5791220 | -2.7634420 | H | -0.4748230 | 1.6815500  | 0.1097300  |
| H | 0.6290170  | -3.3935430 | -4.0259450 |   |            |            |            |
| H | -0.1050330 | -2.7307630 | -2.5458680 |   |            |            |            |
| O | 1.7969470  | -1.3448440 | 1.9581270  |   |            |            |            |
| C | 2.9377540  | -1.7803130 | 2.7053970  |   |            |            |            |
| H | 3.8006160  | -1.7359940 | 2.0387190  |   |            |            |            |

**Table S-24.** Geometric coordinates and thermally corrected MP2 energies for the A(THF)<sub>2</sub> mediated *syn* elimination of *exo*-2-bromonorbornane (**22**).

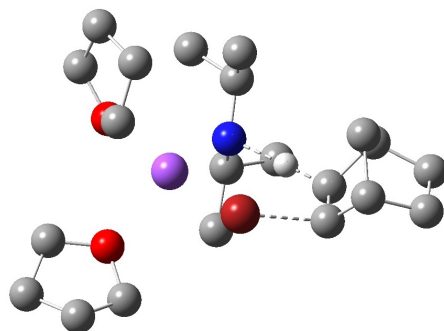

**G** = -2361307.377

**G<sub>MP2</sub>** = -2358060.153

| Atom | X          | Y          | Z          | Atom | X          | Y          | Z          |
|------|------------|------------|------------|------|------------|------------|------------|
| C    | 5.1984600  | -0.5168800 | 0.3874120  | C    | 2.2617680  | 1.0868050  | -3.6404560 |
| C    | 3.8952280  | 0.3230100  | 0.3469290  | H    | 2.2447800  | 0.8324690  | -4.7080470 |
| C    | 3.3956450  | 0.1595040  | 1.7998690  | H    | 2.5494270  | 2.1406780  | -3.5605900 |
| C    | 3.3286880  | -1.3795320 | 1.7283410  | H    | 3.0517790  | 0.4922620  | -3.1680880 |
| C    | 4.7961870  | -1.7240500 | 1.2917120  | C    | 0.4788250  | -0.6507190 | -3.2090110 |
| H    | 4.8614950  | -2.6888650 | 0.7769660  | H    | -0.5615600 | -0.8254970 | -2.9093340 |
| H    | 5.4287520  | -1.7909130 | 2.1844960  | H    | 0.5707530  | -0.9346120 | -4.2649770 |
| C    | 2.5103220  | -1.5757660 | 0.4789370  | H    | 1.1138250  | -1.3263570 | -2.6234500 |
| C    | 2.8323950  | -0.4925190 | -0.4377540 | C    | 1.0644290  | 2.5651590  | -1.2832680 |
| H    | 3.1693700  | -0.8715990 | -1.4103360 | H    | 2.1125370  | 2.8192710  | -1.5448010 |
| H    | 2.2893950  | -2.5764370 | 0.1246560  | C    | 0.1802810  | 3.5785920  | -2.0472020 |
| Br   | 0.2232810  | -1.4570330 | 1.3782270  | H    | 0.4098590  | 4.6077020  | -1.7413830 |
| Na   | -1.0191570 | 0.1918170  | -0.4384090 | H    | 0.3208710  | 3.5193400  | -3.1313150 |
| N    | 0.7532980  | 1.1671320  | -1.5773650 | H    | -0.8827190 | 3.3875330  | -1.8396760 |
| C    | 0.8781780  | 0.8196520  | -2.9978510 | C    | 0.9232360  | 2.8240520  | 0.2234700  |
| H    | 0.1579570  | 1.4130750  | -3.5958250 | H    | 1.5497480  | 2.1429370  | 0.8048790  |
| H    | 1.2107090  | 3.8524930  | 0.4762860  | H    | 4.0284730  | 1.3474150  | -0.0103070 |
| H    | -0.1158010 | 2.6779770  | 0.5499400  | H    | 5.5220230  | -0.8251490 | -0.6125240 |

|   |            |            |            |   |           |           |            |
|---|------------|------------|------------|---|-----------|-----------|------------|
| O | -2.6366290 | 1.2548920  | 0.9613200  | H | 6.0206510 | 0.0527990 | 0.8372130  |
| C | -2.6728160 | 0.8171480  | 2.3323460  | H | 1.9060550 | 0.2172400 | -0.7982300 |
| H | -3.6977190 | 0.5115350  | 2.5952830  |   |           |           |            |
| H | -2.0003320 | -0.0394160 | 2.4160410  |   |           |           |            |
| C | -2.2269930 | 2.0453290  | 3.1257160  |   |           |           |            |
| C | -2.8334820 | 3.2201620  | 2.3197490  |   |           |           |            |
| C | -3.1504590 | 2.5987200  | 0.9361860  |   |           |           |            |
| H | -4.2331830 | 2.5690520  | 0.7499810  |   |           |           |            |
| H | -2.6679710 | 3.1146140  | 0.1019240  |   |           |           |            |
| H | -3.7469580 | 3.5984740  | 2.7893660  |   |           |           |            |
| H | -2.1341610 | 4.0567460  | 2.2383380  |   |           |           |            |
| H | -1.1337140 | 2.0991800  | 3.1262630  |   |           |           |            |
| H | -2.5671140 | 2.0215280  | 4.1653060  |   |           |           |            |
| O | -2.5966450 | -1.3287620 | -1.3086890 |   |           |           |            |
| C | -2.3935040 | -2.7388660 | -1.0651920 |   |           |           |            |
| H | -2.1932300 | -3.2478840 | -2.0191500 |   |           |           |            |
| H | -1.5229360 | -2.8304180 | -0.4115060 |   |           |           |            |
| C | -3.6995480 | -3.2181620 | -0.4373290 |   |           |           |            |
| C | -4.7400000 | -2.3825880 | -1.2010410 |   |           |           |            |
| C | -4.0098380 | -1.0456760 | -1.4120100 |   |           |           |            |
| H | -4.2136610 | -0.6025000 | -2.3938430 |   |           |           |            |
| H | -4.2570050 | -0.3106560 | -0.6374810 |   |           |           |            |
| H | -4.9690690 | -2.8522480 | -2.1646220 |   |           |           |            |
| H | -5.6813340 | -2.2595020 | -0.6569610 |   |           |           |            |
| H | -3.7127910 | -2.9732280 | 0.6313370  |   |           |           |            |
| H | -3.8502070 | -4.2967200 | -0.5436290 |   |           |           |            |
| H | 2.9837460  | -1.9197060 | 2.6107980  |   |           |           |            |
| H | 2.4147390  | 0.6022740  | 1.9882730  |   |           |           |            |
| H | 4.1115120  | 0.5220710  | 2.5464840  |   |           |           |            |

**Table S-25.** Geometric coordinates and thermally corrected MP2 energies for the A(THF)<sub>2</sub> mediated *syn* elimination of *exo*-2-chloronorbornane (**23**).

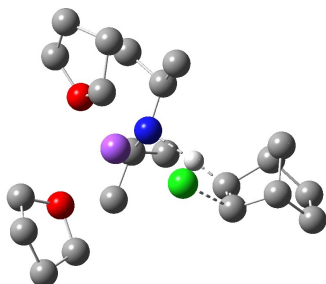

**G** = -1036317.92

**G<sub>MP2</sub>** = -1033769.169

| Atom | X          | Y          | Z          | Atom | X          | Y          | Z          |
|------|------------|------------|------------|------|------------|------------|------------|
| C    | 5.1609640  | -0.5191440 | 0.7387950  | H    | 2.7899070  | 1.9486270  | -3.2867250 |
| C    | 3.8960170  | 0.3560220  | 0.5418960  | H    | 3.2500910  | 0.3135700  | -2.7981690 |
| C    | 3.3876170  | 0.4732310  | 1.9956720  | C    | 0.7059230  | -0.8464120 | -3.0966830 |
| C    | 3.2539460  | -1.0499830 | 2.1975240  | H    | -0.3525310 | -1.0248630 | -2.8708690 |
| C    | 4.7091970  | -1.5231720 | 1.8455230  | H    | 0.8816940  | -1.1495100 | -4.1366290 |
| H    | 4.7413820  | -2.5685650 | 1.5196010  | H    | 1.3033700  | -1.5035710 | -2.4526800 |
| H    | 5.3342270  | -1.4452570 | 2.7425570  | C    | 1.0307980  | 2.4330700  | -1.2185790 |
| C    | 2.4413220  | -1.4382750 | 0.9922690  | H    | 2.1061700  | 2.6965350  | -1.3005660 |
| C    | 2.7962720  | -0.5373860 | -0.0937800 | C    | 0.2860170  | 3.4027680  | -2.1650840 |
| H    | 3.1087100  | -1.0865880 | -0.9903380 | H    | 0.4251850  | 4.4427260  | -1.8424240 |
| H    | 2.2031550  | -2.4808110 | 0.8145620  | H    | 0.6372370  | 3.3315570  | -3.1994320 |
| Cl   | 0.2500870  | -1.1701380 | 1.7639670  | H    | -0.7912470 | 3.1834850  | -2.1636320 |
| Na   | -0.9366060 | -0.0073820 | -0.3274380 | C    | 0.6184730  | 2.7471220  | 0.2266900  |
| N    | 0.7944970  | 1.0155650  | -1.4951900 | H    | 1.0832870  | 2.0517010  | 0.9307680  |
| C    | 1.0722280  | 0.6309930  | -2.8827300 | H    | 0.9044660  | 3.7676920  | 0.5111840  |
| H    | 0.4184590  | 1.2020860  | -3.5704690 | H    | -0.4706380 | 2.6609840  | 0.3453160  |
| C    | 2.5177570  | 0.8911070  | -3.3735050 | O    | -2.8152920 | 1.0886910  | 0.6692130  |
| H    | 2.6252960  | 0.6110810  | -4.4296010 | C    | -2.9216900 | 0.9964650  | 2.1063500  |
| H    | -3.8068370 | 0.3988320  | 2.3719560  |      |            |            |            |

|   |            |            |            |
|---|------------|------------|------------|
| H | -2.0257960 | 0.4856230  | 2.4677240  |
| C | -3.0685090 | 2.4414150  | 2.5734660  |
| C | -3.9606420 | 3.0371400  | 1.4699570  |
| C | -3.5218430 | 2.2646040  | 0.2102830  |
| H | -4.3729350 | 1.9543520  | -0.4079020 |
| H | -2.8317440 | 2.8411120  | -0.4148680 |
| H | -5.0165670 | 2.8438910  | 1.6904420  |
| H | -3.8367860 | 4.1177560  | 1.3546960  |
| H | -2.0882780 | 2.9306020  | 2.5887660  |
| H | -3.5094500 | 2.5216360  | 3.5716150  |
| O | -2.2430330 | -1.8250010 | -1.0831530 |
| C | -3.6767600 | -1.8457200 | -0.9775490 |
| H | -3.9849450 | -0.8891620 | -0.5484200 |
| H | -4.1220470 | -1.9521270 | -1.9785860 |
| C | -3.9903640 | -3.0571460 | -0.1020480 |
| C | -2.9314580 | -4.0639710 | -0.5814290 |
| C | -1.7215840 | -3.1662890 | -0.8943690 |
| H | -1.0076010 | -3.1230400 | -0.0656860 |
| H | -1.1941300 | -3.4702390 | -1.8051890 |
| H | -2.6957810 | -4.8270780 | 0.1658970  |
| H | -3.2790880 | -4.5754990 | -1.4864440 |
| H | -5.0165410 | -3.4172170 | -0.2250890 |
| H | -3.8342680 | -2.8081260 | 0.9539640  |
| H | 2.8832560  | -1.4131020 | 3.1566350  |
| H | 2.4310660  | 0.9909330  | 2.0929010  |
| H | 4.1185330  | 0.9292030  | 2.6734930  |
| H | 4.0722260  | 1.2948160  | 0.0108410  |
| H | 5.4658440  | -1.0180460 | -0.1874020 |
| H | 6.0099790  | 0.0853430  | 1.0801310  |
| H | 1.8978910  | 0.1450970  | -0.5657230 |

**Table S-26.** Geometric coordinates and thermally corrected MP2 energies for the A(THF)<sub>3</sub> mediated *syn* elimination of (*E*)-1-bromocyclooct-1-ene (**26**).

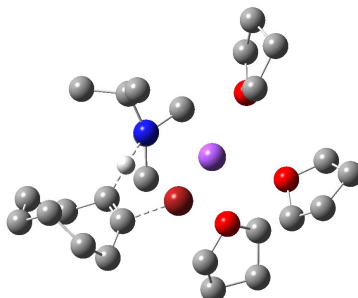

$G = -2531655.352$

$G_{MP2} = -2527921.345$

| Atom | X          | Y          | Z          | Atom | X          | Y          | Z          |
|------|------------|------------|------------|------|------------|------------|------------|
| Na   | -0.9677510 | 0.1946220  | 0.5051790  | H    | 4.6221550  | -1.6295280 | -3.3864860 |
| Br   | 0.5287270  | -0.5662750 | -1.7572850 | H    | 4.0077720  | -2.1432980 | -1.1059630 |
| C    | 2.4320230  | -0.7932000 | -0.8505440 | H    | 2.6349450  | -2.5070790 | -2.1471650 |
| C    | 3.2360740  | -1.6850370 | -1.7423350 | N    | 0.8428750  | 1.4165310  | 1.5970250  |
| C    | 3.9278360  | -0.9324850 | -2.8956080 | C    | 0.8378370  | 1.1982750  | 3.0494180  |
| C    | 4.6850930  | 0.3356120  | -2.4636180 | H    | 1.5806600  | 1.8402240  | 3.5580610  |
| C    | 5.6705770  | 0.1697520  | -1.2793180 | C    | -0.5279720 | 1.5432950  | 3.6858970  |
| C    | 5.1784970  | 0.6415130  | 0.1067560  | H    | -0.4938800 | 1.4791960  | 4.7825880  |
| C    | 4.0922660  | -0.1924450 | 0.8270890  | H    | -0.8468810 | 2.5585560  | 3.4231360  |
| C    | 2.6925770  | -0.1006670 | 0.2269580  | H    | -1.3044990 | 0.8459540  | 3.3361760  |
| H    | 4.4403740  | -1.2376430 | 0.8812730  | C    | 1.2108580  | -0.2496540 | 3.3979470  |
| H    | 4.0526910  | 0.1649200  | 1.8657420  | H    | 2.2291490  | -0.4864450 | 3.0746900  |
| H    | 6.0533940  | 0.6759170  | 0.7725280  | H    | 1.1509480  | -0.4158790 | 4.4813360  |
| H    | 4.8295260  | 1.6787910  | 0.0158200  | H    | 0.5295870  | -0.9516240 | 2.9043990  |
| H    | 6.5737800  | 0.7538780  | -1.5008730 | C    | 1.0659060  | 2.8279890  | 1.2480480  |
| H    | 6.0106980  | -0.8746570 | -1.2132820 | H    | 0.3547310  | 3.4699480  | 1.8060360  |
| H    | 5.2357910  | 0.7007000  | -3.3407890 | C    | 2.4805230  | 3.3616380  | 1.5808360  |
| H    | 3.9598470  | 1.1198670  | -2.2166430 | H    | 2.5505590  | 4.4389200  | 1.3789150  |

|   |            |            |            |   |            |            |            |
|---|------------|------------|------------|---|------------|------------|------------|
| H | 3.1766010  | -0.6562360 | -3.6464450 | H | 2.7455820  | 3.2102330  | 2.6325720  |
| H | 3.2338590  | 2.8545940  | 0.9682000  | O | -0.8752010 | -2.1246030 | 1.3461050  |
| C | 0.7951830  | 3.0489580  | -0.2467820 | C | 0.1654020  | -3.0644090 | 0.9985260  |
| H | -0.2420960 | 2.8048020  | -0.4946570 | H | -0.0605680 | -3.5030060 | 0.0166500  |
| H | 0.9821100  | 4.0922460  | -0.5335700 | H | 1.1020120  | -2.5082930 | 0.9262970  |
| H | 1.4413500  | 2.4062200  | -0.8537880 | C | 0.1308880  | -4.1217660 | 2.1005820  |
| O | -2.5937000 | 1.9491290  | -0.1316640 | C | -1.3718950 | -4.1956280 | 2.4148860  |
| C | -2.9400170 | 3.1231360  | 0.6393580  | C | -1.8064870 | -2.7310950 | 2.2617060  |
| H | -3.7336750 | 2.8424440  | 1.3435830  | H | -2.8175760 | -2.6171470 | 1.8568550  |
| H | -2.0627270 | 3.4406390  | 1.2106460  | H | -1.7513250 | -2.1933010 | 3.2178190  |
| C | -3.4166800 | 4.1791690  | -0.3691930 | H | -1.8825230 | -4.8277210 | 1.6783060  |
| C | -3.8758340 | 3.3216820  | -1.5600180 | H | -1.5915740 | -4.5935790 | 3.4101950  |
| C | -2.8526240 | 2.1880770  | -1.5294850 | H | 0.6898020  | -3.7752320 | 2.9776320  |
| H | -3.1992700 | 1.2475180  | -1.9637610 | H | 0.5538600  | -5.0790080 | 1.7805010  |
| H | -1.9201460 | 2.4812880  | -2.0317720 | H | 1.7810550  | 0.6776510  | 0.9269970  |
| H | -4.8868720 | 2.9318530  | -1.3886360 | H | -3.4787030 | -1.3915640 | -3.1681240 |
| H | -3.8754950 | 3.8650160  | -2.5097930 |   |            |            |            |
| H | -2.5832770 | 4.8247150  | -0.6685950 |   |            |            |            |
| H | -4.2070630 | 4.8166900  | 0.0379890  |   |            |            |            |
| O | -3.0625100 | -1.0580890 | -0.4227990 |   |            |            |            |
| C | -2.8738660 | -2.2059120 | -1.2576710 |   |            |            |            |
| H | -1.8332770 | -2.2000820 | -1.5853020 |   |            |            |            |
| H | -3.0686950 | -3.1258820 | -0.6824670 |   |            |            |            |
| C | -3.9001430 | -2.0271760 | -2.3824700 |   |            |            |            |
| C | -5.0806790 | -1.3127300 | -1.6730290 |   |            |            |            |
| C | -4.4752450 | -0.8572510 | -0.3205420 |   |            |            |            |
| H | -4.6315470 | 0.1982840  | -0.0890320 |   |            |            |            |
| H | -4.8754390 | -1.4610000 | 0.5089120  |   |            |            |            |
| H | -5.4463380 | -0.4651890 | -2.2605660 |   |            |            |            |
| H | -5.9280890 | -1.9868690 | -1.5136840 |   |            |            |            |
| H | -4.1909080 | -2.9770740 | -2.8411220 |   |            |            |            |
